# Supplementary material for: Novel circulating protein biomarkers for thyroid cancer determined through data-independent acquisition mass spectrometry
Source: PeerJ. 2020 Jul 6;8:e9507. doi: 10.7717/peerj.9507 (PMC7346861; doi:10.7717/peerj.9507)
Supplement: Supplemental Information 1 [file peerj-08-9507-s001.xlsx]

## Sheet: protein identification
group	PG.ProteinDescriptions	PG.ProteinGroups	TN	TN	TN	TN	TN	TN	TN	TN	TN	TN	TN	TN	TN	TN	TN	HC	HC	HC	HC	HC	HC	HC	HC	HC	HC	PTC	PTC	PTC	PTC	PTC	PTC	PTC	PTC	PTC	PTC	PTC	PTC	PTC	FC	FC	FC	FC	FC	FC	MC	MC	MC
P01889;P30460;Q04826;P30479;P30480;P30501;P04222;P30504;Q29963;P30505;P30508;P30510;Q07000;Q29865	HLA class I histocompatibility antigen, B-7 alpha chain;HLA class I histocompatibility antigen, B-8 alpha chain;HLA class I histocompatibility antigen, B-40 alpha chain;HLA class I histocompatibility antigen, B-41 alpha chain;HLA class I histocompatibility antigen, B-42 alpha chain;HLA class I histocompatibility antigen, Cw-2 alpha chain;HLA class I histocompatibility antigen, Cw-3 alpha chain;HL…	1B07_HUMAN;1B08_HUMAN;1B40_HUMAN;1B41_HUMAN;1B42_HUMAN;1C02_HUMAN;1C03_HUMAN;1C04_HUMAN;1C06_HUMAN;1C08_HUMAN;1C12_HUMAN;1C14_HUMAN;1C15_HUMAN;1C18_HUMAN	26877.2	15207.1	Filtered	3091.26	11156.5	17687.5	15756	15978.5	21129.1	28488.3	16170.9	9506.93	8815.9	23288.3	11211.6	34200.1	13045	15595.2	3706.39	6498.26	Filtered	5359.98	13451.6	5433.09	Filtered	24762.9	16126.3	26590	9256.49	8699.4	15579.5	32668.8	25203.2	3889.01	14352	10053.1	12912	27223.5	9849.87	108207	24918.6	10698.2	Filtered	13683	Filtered	7354.4	10844.7
P08195	4F2 cell-surface antigen heavy chain	4F2_HUMAN	4624.13	717.319	2413.09	Filtered	668.931	Filtered	3233	1751.13	5894.5	4406.33	3952.45	3630.75	1671.21	3163.82	3199.65	2374.34	2424.9	Filtered	Filtered	1715.36	Filtered	Filtered	Filtered	2913.75	Filtered	Filtered	Filtered	10838	Filtered	Filtered	963.156	3230.85	1445.68	2888.51	2923.67	1044.72	1081.5	2375.53	Filtered	Filtered	Filtered	Filtered	Filtered	Filtered	1428.28	2923.03	Filtered
P52209	6-phosphogluconate dehydrogenase, decarboxylating	6PGD_HUMAN	Filtered	37662.3	Filtered	63387.3	Filtered	Filtered	Filtered	3308.25	Filtered	Filtered	6355.25	4195.47	Filtered	Filtered	Filtered	521.12	Filtered	55637.8	146095	Filtered	Filtered	Filtered	Filtered	46694.9	Filtered	Filtered	Filtered	Filtered	5293.3	Filtered	66831.5	3856.35	3444.42	Filtered	2658.22	Filtered	32672.3	Filtered	108919	Filtered	80120.1	77485.3	Filtered	99831.1	36939.6	144836	50104.1
P02763	Alpha-1-acid glycoprotein 1	A1AG1_HUMAN	562366	1.29497e+06	371463	394308	450703	1277787	417738	656223	2.13288e+06	352260	544507	500539	771519	287916	407376	669051	371908	406841	334706	371318	580118	406304	222369	254332	3172943	393440	1.34412e+06	1.48074e+06	764164	395188	849398	667468	325290	721018	606754	733832	846038	1.38472e+06	477428	2.13502e+06	1.31913e+06	2.04886e+06	10162301	3.61957e+06	384587	433254	1.05211e+06
P19652	Alpha-1-acid glycoprotein 2	A1AG2_HUMAN	229885	277420	127799	157402	217380	388359	143261	140604	607751	175592	177173	221070	180412	101205	138255	170473	107331	163900	106697	153536	137162	113900	137053	110961	566745	123721	318788	256405	207810	149991	174550	210463	68226.4	286826	132806	217364	281977	389594	182853	543173	410934	441609	1338908	734067	123856	111852	216272
P01009	Alpha-1-antitrypsin	A1AT_HUMAN	2.28608e+06	1.01574e+06	1.45714e+06	1147822	1.77238e+06	549544	2.16575e+06	1948212	5589886	1.10075e+06	2.04513e+06	1.8753e+06	2.02404e+06	1336043	1535603	998990	1.67287e+06	1.20098e+06	1.42694e+06	1158548	1.26455e+06	1.8555e+06	1.16622e+06	1.40979e+06	3.72418e+06	1.19082e+06	2195074	1.9078e+06	2.598e+06	1.39941e+06	4.54309e+06	3.34492e+06	2.85502e+06	2.14467e+06	1.49181e+06	706004	1.51424e+06	1.81989e+06	5.36982e+06	3427438	4.50825e+06	5593931	4.60884e+06	15214910	3357476	1.62747e+06	5460829
P04217	Alpha-1B-glycoprotein	A1BG_HUMAN	8865355	7.53383e+06	5766273	6.13394e+06	7325039	8.36678e+06	8686767	6819367	12770848	6703777	8748785	6.11319e+06	7214252	8866114	8431572	6085370	8.03488e+06	7117306	5483943	8.05441e+06	5931961	7.69608e+06	7013211	6575691	18546408	11098828	7377289	8741018	8306181	11469911	7.94996e+06	8727269	10269346	5504134	8421097	10518324	8482468	10655358	12191203	22537844	11317928	14318158	29421038	15763100	16178644	12867448	13701475
P08697	Alpha-2-antiplasmin	A2AP_HUMAN	787418	813381	670454	649088	605783	445126	554718	544611	381680	718956	532131	913253	604165	544257	563191	680772	470048	658399	813803	699765	509728	585864	681514	551892	1486580	2.37904e+06	316776	167611	465833	675630	866283	276125	849193	495861	1.34361e+06	304005	781963	1.06716e+06	243476	452522	418008	376182	518962	161298	831541	377889	466753
P02750	Leucine-rich alpha-2-glycoprotein	A2GL_HUMAN	1.47093e+06	1.99394e+06	1.90628e+06	1.8501e+06	1.70629e+06	2.22828e+06	2.30093e+06	1.83321e+06	5.75709e+06	1.031e+06	1.06657e+06	1.10007e+06	2116881	1.37781e+06	1640249	943038	2430399	1.41672e+06	1076121	1.58437e+06	1.81055e+06	1.31781e+06	1.05567e+06	1.68527e+06	6218580	2.16765e+06	3449334	3.06242e+06	4.8237e+06	1.87463e+06	5496412	4292650	2675512	3.22867e+06	2.90655e+06	2.65845e+06	4.60746e+06	5.83506e+06	4.49644e+06	5.52204e+06	4584483	11937978	4.16991e+06	23786980	2.82572e+06	2.6903e+06	6.01921e+06
P01023	Alpha-2-macroglobulin	A2MG_HUMAN	13440852	17153590	45765288	37183092	30587136	36494160	21446740	48444880	29161460	17625432	17181984	12600644	24510678	28165008	34947256	11760526	76751768	26912518	45922400	31375836	32832068	48827468	23212338	19853742	68657280	31416012	6639309	23108138	20186842	25023440	34888120	64966560	33937840	19103340	11977138	17345518	32449546	20149456	66057392	108469424	43227688	30161648	210550832	35530068	30462604	75269480	27619022
P05067	Amyloid beta A4 protein	A4_HUMAN	2433.97	3181.64	3976.82	2818.78	4526.35	2829.72	3218.18	4117.95	3092.95	2587.25	3305.58	3090.12	2654.4	1768.65	2934.29	4040.7	3132.62	2147.86	4446.49	5839.19	1934.07	2879.76	3953.84	2820.86	3341.85	Filtered	Filtered	Filtered	340.804	Filtered	Filtered	842.982	935.147	Filtered	Filtered	Filtered	Filtered	Filtered	Filtered	Filtered	Filtered	372.147	Filtered	Filtered	Filtered	902.304	Filtered
P01011	Alpha-1-antichymotrypsin	AACT_HUMAN	16012331	8056074	12702610	8.25303e+06	7.54913e+06	8879794	11809263	11135249	21583650	7.40785e+06	6.64949e+06	8111030	14341307	8547589	9183415	6360450	9020755	8443458	8.37733e+06	8404453	8108592	8224272	7.14931e+06	5.36424e+06	20473408	16064989	34547228	24993990	22675406	23639694	34646624	30357660	25318924	36950180	17363496	18435866	23320294	33757692	21815654	42948688	39884328	63607924	58541312	64480400	23877934	27060398	33442600
P17174	Aspartate aminotransferase, cytoplasmic	AATC_HUMAN	58599.3	Filtered	Filtered	425.207	100132	Filtered	1817.36	Filtered	2535.51	550.017	Filtered	12708.8	Filtered	Filtered	8645.74	7234.32	Filtered	Filtered	397.795	Filtered	Filtered	Filtered	474.852	659.89	Filtered	6075.99	5887.86	15109.1	5733.79	Filtered	7037.97	8812.61	9726.48	6616.16	4188.39	6819.37	412.033	567.615	11692.8	1017.69	368.48	608.29	Filtered	11655.1	12579.1	4685.92	149.209
P12821	Angiotensin-converting enzyme	ACE_HUMAN	Filtered	Filtered	7458.15	4097.31	8853.13	Filtered	5354.33	3308.28	2844.02	3627.31	Filtered	Filtered	3838.11	Filtered	7852.98	Filtered	4464.66	Filtered	2021.1	8692.57	Filtered	1013.07	Filtered	Filtered	Filtered	2932.65	14569.6	10518.2	15278.4	9682.07	10785.5	10277.3	20798.4	17662.5	3857.36	10197.8	13803.5	5273.47	12464.6	17956.2	15773.7	12679.3	Filtered	14412.5	6568.29	11848.9	8149
P62736;P68032;P63267;P68133	Actin, aortic smooth muscle;Actin, alpha cardiac muscle 1;Actin, gamma-enteric smooth muscle;Actin, alpha skeletal muscle	ACTA_HUMAN;ACTC_HUMAN;ACTH_HUMAN;ACTS_HUMAN	27766.9	26416.6	20167.9	23424	13858.7	19647.3	12714.9	12659.1	4972.51	39327.2	99033.5	31594.5	21141.9	13721.6	21954.1	12743.1	12335.5	29672.7	25098.8	26335.5	28101	35118	22836.2	14729.3	63368.6	26574.6	7571.92	Filtered	58129.3	16011.5	9971.41	9171.87	10816.4	9158.84	8522.13	25627.5	19154.8	8071.52	4398.96	23794.6	12774.3	15863	8790.63	10304.2	20975.3	17037.5	24754.5
P60709;P63261	Actin, cytoplasmic 1;Actin, cytoplasmic 2	ACTB_HUMAN;ACTG_HUMAN	15587.6	17062.8	11821.5	13618.2	14779.6	7094.02	6903.07	11827.6	3600.69	15309	79047.6	18161.4	32321	7095.96	11545.6	9325.23	5560.99	14109.2	12081.4	10934	4885.2	12336.5	9479.87	6254.18	22463.5	19498.5	6403.52	6523.88	44710.5	15591.6	2300.42	7653.79	8682.97	3268.33	7522.12	22317	11156.4	2999.08	1616.25	21952.9	6493.98	10460.7	Filtered	5160.9	21424.1	14444.7	32806.9
Q15848	Adiponectin	ADIPO_HUMAN	7742.76	15114.9	14172.2	5341.3	13837.1	11243.4	34771.9	17824.5	9826.3	8984.08	11391.5	16626.5	9872.22	32433.4	18645.3	4785.86	29027.5	18019.1	12664.1	26471.5	8099.23	18701	15005	6482.6	Filtered	40565.2	15165	36994.1	29858.9	24173.7	37881.7	35897.9	28968.1	32432.1	22492.9	44104.8	27056.3	74291.1	122521	60685.5	83133.2	45603	20340.1	59283.9	32152.2	22741.2	19581.9
P43652	Afamin	AFAM_HUMAN	1774818	1.30316e+06	797884	797172	1.09581e+06	612301	732049	685365	557446	1610817	832639	501012	883797	715542	1.1629e+06	1.0854e+06	733360	661145	744504	536099	768553	695972	903017	541667	902571	1.00472e+06	1.18749e+06	1.27017e+06	928570	1.82422e+06	903978	760421	1.07015e+06	1.06651e+06	830775	1.35724e+06	1.3025e+06	1202064	1.03137e+06	2.83976e+06	1.31659e+06	2059337	5.70512e+06	998262	1.2431e+06	1093390	1.74805e+06
P02768	Serum albumin	ALBU_HUMAN	45624420	66064004	50571080	93611304	45131284	120349456	52262668	64425976	37489224	131669368	59969352	72375656	49086552	39295880	56016112	62068712	83391200	144723568	116510920	123945568	146807424	102071328	162889056	89281128	147933024	31100884	71822064	33228722	30032054	40873880	28475594	39118828	58515912	86980920	29143652	19109264	35265932	27013728	48595764	49824628	72736968	32194790	127803664	38871132	77074264	68252384	33870056
P04075	Fructose-bisphosphate aldolase A	ALDOA_HUMAN	Filtered	Filtered	Filtered	Filtered	Filtered	Filtered	Filtered	Filtered	Filtered	Filtered	18087.9	780.981	Filtered	Filtered	Filtered	Filtered	Filtered	Filtered	Filtered	Filtered	Filtered	Filtered	Filtered	Filtered	Filtered	Filtered	Filtered	Filtered	6340.08	23448.4	Filtered	4605.39	Filtered	Filtered	Filtered	5596.11	4274.94	4601.82	3575.08	Filtered	Filtered	7963.64	14133.9	Filtered	Filtered	4527.83	10182.8
P05062	Fructose-bisphosphate aldolase B	ALDOB_HUMAN	7302.85	Filtered	3358.52	4504.23	8538.04	Filtered	1168.18	3459.85	Filtered	11327.9	16938.6	42689.7	Filtered	7540.22	11627	10372.9	3436.03	Filtered	2670.66	2175.71	Filtered	8959.29	3177.19	8777.55	Filtered	6952.6	6758.55	2864.62	1820.19	2843.92	2877.94	767.912	8722.01	4562.42	6227.49	8052.97	Filtered	17459.2	19383.4	Filtered	Filtered	2939.92	Filtered	4005.63	6200.75	3882.71	4848.96
P35858	Insulin-like growth factor-binding protein complex acid labile subunit	ALS_HUMAN	905268	798014	706640	606677	681342	794602	667333	593872	637198	614776	528331	718223	724935	544997	846425	724825	637696	882582	730768	711909	780202	510547	874156	552999	1.64796e+06	1.09808e+06	1.37804e+06	1.68134e+06	2.00297e+06	3.41725e+06	1159445	1.38066e+06	1.39341e+06	1.27674e+06	1108631	1.74418e+06	1.05693e+06	1.53538e+06	716574	3110418	1.36406e+06	2.07247e+06	19417160	1056059	1.51679e+06	1.37287e+06	1.92913e+06
P02760	Protein AMBP	AMBP_HUMAN	465236	266182	349749	282397	316124	245629	310031	255407	226858	432753	298534	397401	490877	314110	279302	334343	250107	248403	188943	263089	326032	227680	209898	200311	709962	881569	438047	526497	389033	1.86066e+06	296504	494480	150444	543202	266794	381537	476628	326117	376385	4.67888e+06	428991	386881	17781520	989256	630715	162263	459057
Q07075	Glutamyl aminopeptidase	AMPE_HUMAN	Filtered	Filtered	1209.88	Filtered	Filtered	1546.36	Filtered	Filtered	Filtered	Filtered	Filtered	Filtered	Filtered	Filtered	149.349	Filtered	1234.02	Filtered	Filtered	Filtered	Filtered	1219.19	Filtered	Filtered	Filtered	Filtered	5843.95	5482.05	2396.58	6089.13	4388.57	6357.77	Filtered	7250.58	2076.31	4432.81	2260.28	4891.7	6692.71	19430	5242.97	7900.59	Filtered	3310.2	Filtered	4434.08	4394.61
P15144	Aminopeptidase N	AMPN_HUMAN	15733.1	14756.3	15920.4	29192.1	15565.3	12945.9	12792.4	8527.75	9449.7	20636.7	12321.8	13219.4	15157.2	11871.6	17382.8	12358.5	22519.2	15965.7	13815.2	9447.65	18261.6	18068.3	19905.1	12644.7	11047.7	21570.7	51437.1	75280.6	35583.4	40386.5	34884.1	38146.2	18824.9	66125.8	29540.4	26835	25418.1	34338.6	51352.8	31786.7	56997.6	49643.3	49496.1	39228.2	36921.8	27957.1	37734.7
P04745;P19961;P04746	Alpha-amylase 1;Alpha-amylase 2B;Pancreatic alpha-amylase	AMY1_HUMAN;AMY2B_HUMAN;AMYP_HUMAN	3450.72	Filtered	6510.75	Filtered	Filtered	Filtered	Filtered	4143.42	Filtered	Filtered	Filtered	Filtered	3105.33	Filtered	2655.4	1824.15	1777.25	Filtered	Filtered	1670.2	Filtered	Filtered	Filtered	Filtered	Filtered	8639.69	4679.37	9105.56	7982	13259.7	7908.64	10300.2	7402.03	18985.5	8380.1	6725.75	5760.32	5486.21	7008.21	18746.7	4851.61	3582.71	Filtered	4087.35	6118.9	8546.58	4497.7
P54802	Alpha-N-acetylglucosaminidase	ANAG_HUMAN	9394.07	Filtered	2278.08	3175.32	4300.41	Filtered	5624.43	3457.25	4577.74	3485.72	3239.12	4077.82	4944.59	2842.17	3403.68	3824.25	4753.27	3418.25	3021.98	4792.32	4133.09	Filtered	5078.61	3141.59	Filtered	5317.04	6874.04	13914.4	8192.5	13655.6	7462.81	7151.04	14493.3	13942.7	3887.63	6557.25	4902.75	6281.45	11682.7	Filtered	11865.3	9014.74	Filtered	Filtered	8510.56	3791.54	9893.21
P03950	Angiogenin	ANGI_HUMAN	Filtered	Filtered	Filtered	Filtered	Filtered	Filtered	Filtered	Filtered	Filtered	Filtered	11685.9	5872.75	7024.2	Filtered	Filtered	Filtered	8935.15	Filtered	Filtered	Filtered	Filtered	Filtered	Filtered	Filtered	Filtered	Filtered	19255.8	29642	8880.29	9535.52	Filtered	Filtered	Filtered	3820.43	Filtered	Filtered	Filtered	Filtered	Filtered	Filtered	Filtered	Filtered	56330.7	Filtered	Filtered	Filtered	Filtered
P01019	Angiotensinogen	ANGT_HUMAN	749311	756924	519873	596926	538839	656507	538769	695895	376749	878060	436030	437052	515714	577212	601081	646831	493789	757715	1.01799e+06	678320	736803	859646	669052	547188	6597969	1.55683e+06	1.58231e+06	1.8344e+06	1.87262e+06	3348210	702853	1.3047e+06	741570	1.14716e+06	701130	1.43029e+06	839494	772781	517709	30444480	919686	2.12409e+06	44678180	1.27395e+06	1.37129e+06	1.08603e+06	1.53984e+06
P01008	Antithrombin-III	ANT3_HUMAN	1.6396e+06	1.92475e+06	1.80783e+06	1.78007e+06	1.99421e+06	2.01358e+06	2.32868e+06	1.90419e+06	2468601	1.71551e+06	1.72414e+06	1.74587e+06	2.33578e+06	2.24715e+06	1.94804e+06	2451690	2.15971e+06	4.0015e+06	2.48247e+06	1.91037e+06	2.39662e+06	1.86949e+06	1.95524e+06	1253216	1.67958e+06	12333458	1.12019e+06	642632	802908	1.11592e+06	2.45253e+06	613433	2.05799e+06	842977	15897429	17758964	11461800	17249210	5212939	3.16759e+06	2.24764e+06	793700	914642	822399	2.03143e+06	1.64587e+06	1.23821e+06
P07355	Annexin A2	ANXA2_HUMAN	9734.99	Filtered	Filtered	Filtered	Filtered	Filtered	Filtered	Filtered	Filtered	Filtered	Filtered	Filtered	11543.8	Filtered	Filtered	Filtered	Filtered	Filtered	Filtered	Filtered	Filtered	Filtered	Filtered	Filtered	Filtered	Filtered	Filtered	Filtered	Filtered	Filtered	Filtered	Filtered	Filtered	Filtered	Filtered	Filtered	Filtered	Filtered	Filtered	Filtered	Filtered	Filtered	Filtered	16465	Filtered	Filtered	Filtered
Q16853	Membrane primary amine oxidase	AOC3_HUMAN	5716.64	12387.2	5167.39	10194.9	6156.05	7763.92	8404.87	4079.36	5033.24	14049.1	4702.68	8686.6	7658.8	6969.25	6534.78	7617.81	7801.9	5250.94	10118.1	10840.5	10701.5	6359.91	6690.44	11827.4	85815.6	14454.7	15723.8	25888.5	11322.4	20796.7	10272.2	7764.51	12150.3	19032.6	12229.2	11646.2	14153.9	17491.8	22427.8	76281.3	28365.1	25515.9	95943.5	20483.3	17066.4	11938.4	14943.6
Q9HDC9	Adipocyte plasma membrane-associated protein	APMAP_HUMAN	6485.57	Filtered	4546.8	9946.15	Filtered	Filtered	5186.79	2925.37	Filtered	977.07	18560	5640.83	19144.9	2114.74	19773.8	Filtered	3921.51	Filtered	Filtered	8667.54	Filtered	10364.6	Filtered	7105.93	Filtered	Filtered	Filtered	Filtered	Filtered	Filtered	Filtered	Filtered	20863.4	Filtered	Filtered	Filtered	Filtered	Filtered	Filtered	Filtered	Filtered	Filtered	Filtered	Filtered	Filtered	Filtered	Filtered
P08519	Apolipoprotein(a)	APOA_HUMAN	1523.67	Filtered	8971.91	Filtered	Filtered	Filtered	Filtered	Filtered	Filtered	Filtered	Filtered	Filtered	Filtered	10772.3	Filtered	Filtered	Filtered	Filtered	Filtered	Filtered	Filtered	Filtered	Filtered	29166.6	Filtered	8102.34	Filtered	150747	41189.7	19918.3	Filtered	Filtered	Filtered	2582.48	Filtered	4503.62	Filtered	Filtered	Filtered	90285.6	4255.66	Filtered	66340.1	Filtered	Filtered	Filtered	Filtered
P02647	Apolipoprotein A-I	APOA1_HUMAN	7.16489e+06	6274838	11942270	10823878	7.70434e+06	6643920	14112588	16744737	6543207	9714770	16768785	8437013	8414497	14901098	6466251	11070833	17372492	10086094	12545786	21825140	10905215	19869354	12442305	14783052	9020170	12562967	1.09259e+06	917096	2.00929e+06	2659018	4.44148e+06	1.96013e+06	5.7255e+06	1.2866e+06	3.13453e+06	2.52658e+06	2.22351e+06	1.35345e+06	860716	1.80921e+06	1.23527e+06	2.35521e+06	3.9639e+06	1.57467e+06	3.04925e+06	4701958	3416492
P02652	Apolipoprotein A-II	APOA2_HUMAN	936645	1059135	1.3249e+06	637232	554630	442845	1072476	1.55119e+06	809314	768870	1.92302e+06	816788	847701	1.06981e+06	474338	1.56005e+06	736281	1.15169e+06	428355	596695	631379	1483144	1420918	1.0068e+06	759904	739670	151389	296568	217254	363002	248723	215080	404780	91856	388826	441762	552009	250606	274540	320776	186523	429950	426553	209311	317207	341691	301497
P06727	Apolipoprotein A-IV	APOA4_HUMAN	6.2027e+06	3.94454e+06	4592611	3.5513e+06	4361746	4.49026e+06	5895390	7512830	1.32952e+06	4.08953e+06	3.96904e+06	3.10336e+06	3.94236e+06	4718812	2.93021e+06	5303237	5032156	3.75639e+06	2.79186e+06	4918070	5011111	3.07628e+06	3.7178e+06	3567475	7.94904e+06	8479080	106383	108279	122742	274076	167652	214875	320539	424170	390389	347008	270954	236603	403638	194682	84083.7	385239	293704	289009	580890	378383	381744
P04114	Apolipoprotein B-100	APOB_HUMAN	570215	732136	416383	473640	708048	138627	488071	669978	204129	467892	1.02724e+06	435224	727295	401571	864264	676544	696855	510665	742578	487985	422938	626182	728224	1.21255e+06	3088028	521187	395548	181849	319433	477280	636228	154008	519706	338701	360255	502005	605583	241121	60365.9	533987	173185	377549	1462591	418169	543558	536968	875836
P02654	Apolipoprotein C-I	APOC1_HUMAN	69210.1	73134.4	44454.5	45256.2	48878.2	23278.1	109657	122299	45779.9	44644.1	170576	75176.8	45342.5	63811.3	98224	66753.4	100260	75513.1	103157	99026.7	56087.4	84199.4	74377.5	91466	Filtered	50721.1	90814.4	71402.6	62686.1	210172	83865.3	45689.3	104306	160578	57287.4	61450.6	73573.9	44783.5	31862.9	83714.6	42966.5	79457.5	16706.2	111980	57608.2	62627	117333
P02655	Apolipoprotein C-II	APOC2_HUMAN	70556.5	179381	41868.2	60479.4	102244	30386.5	99752.4	297118	79376.9	119139	384404	119306	82873.5	63543.7	255731	220847	78223.5	161402	408108	149658	87318.4	104269	158135	247511	223063	40446.1	33106.2	32841.5	25172.9	38029.6	70254.8	41213.2	66120.5	68463.9	41054.9	52536	67029.5	75453.5	17188.1	Filtered	25109.8	43387.6	Filtered	62025.3	55305.7	37580.2	61588.4
P02656	Apolipoprotein C-III	APOC3_HUMAN	28102.9	58993.8	25795.2	21694.7	32769.9	5762.64	35727.8	135343	23867.3	77882.6	267239	40544.2	15518.2	25924.3	75590	84136.1	43512.2	65425.7	298620	112916	24595.6	36345.1	62845.5	107988	Filtered	16572.4	11434.3	68905.6	11563.8	9361.41	13744.4	14715.4	9092.64	13136.4	9507.88	7181.44	16446.1	15483	2871.8	Filtered	7323.04	22478.1	Filtered	3326.93	3881.21	7953.83	Filtered
P55056	Apolipoprotein C-IV	APOC4_HUMAN	4464.26	8435.33	Filtered	12056.7	6114.34	1866.88	3213.87	8995.3	3642.12	29407.4	3734.4	6390.55	4877.39	11625.2	11954.1	8184.96	4791.09	22159.7	13898.4	5515.29	1864.28	456.493	4545.24	11574.6	Filtered	6068.11	13268.4	Filtered	5060.94	13855.7	4647.53	Filtered	4190.18	10926.8	5574.14	3991.13	7560.62	Filtered	Filtered	Filtered	Filtered	6183.35	Filtered	10265.3	11274.1	7803.89	19901.2
P05090	Apolipoprotein D	APOD_HUMAN	69474.4	116703	94727.7	106459	54469.7	62290.9	76593.9	124611	65563.1	66473.1	51461.5	59375.3	117707	76778.6	87245.5	114403	223661	118472	82129.5	175304	157342	173902	142712	75129.9	406217	77327.2	16322.6	41616	15637.8	25292.3	70012.6	41235.6	78441.3	53085.3	55532.5	25388.3	63747.8	20818.8	27405.5	Filtered	36856.1	37999.2	64560.1	33870	104104	111696	58280.7
P02649	Apolipoprotein E	APOE_HUMAN	373332	519096	467123	396316	776362	160677	458642	627820	186569	335682	914451	370803	344560	421688	457084	714662	502023	695937	886651	436419	384091	482793	581082	1.08732e+06	1242186	538470	293782	185021	271112	416252	384729	233778	561365	439937	458993	356852	358062	134929	74791.5	308819	120059	415045	503398	326224	260161	425650	603723
Q13790	Apolipoprotein F	APOF_HUMAN	Filtered	Filtered	12371.3	Filtered	10395.5	Filtered	7254.4	6098.08	9102.11	Filtered	7447.08	10443.4	5313.48	16166.4	10892.1	7621.93	11992.1	Filtered	9028.8	12215.6	Filtered	Filtered	8854.86	17647.1	Filtered	Filtered	Filtered	Filtered	Filtered	Filtered	Filtered	Filtered	Filtered	Filtered	Filtered	Filtered	Filtered	Filtered	Filtered	Filtered	Filtered	Filtered	Filtered	Filtered	Filtered	Filtered	Filtered
P02749	Beta-2-glycoprotein 1	APOH_HUMAN	1.56978e+06	1.84261e+06	376899	358132	337332	1.2832e+06	251396	335863	374198	645112	274466	245161	422281	599164	235140	356444	210545	410392	309376	251998	487165	241516	243513	151880	3.99375e+06	2.35045e+06	693445	350894	286628	187150	389158	235758	286032	1.20907e+06	1.68847e+06	1.39697e+06	2.03268e+06	3.86875e+06	1.54777e+06	1.03896e+06	1.03266e+06	408518	157722	571236	440231	275144	357868
O14791	Apolipoprotein L1	APOL1_HUMAN	29637.9	19799.9	37782.7	19967.8	30600.1	28766.8	32407.5	68270	31749.2	24699.4	25015.4	28088.6	35890.9	33693	28800.4	31244.1	50090.8	77247.3	104897	38131.6	67301.5	48514	80158.1	61328.2	227773	20589	43217.4	18471.9	48585.8	36338	81009.1	28139.8	47148.3	27664.9	32201	19030.5	43053.2	33481.6	7037.76	Filtered	11768.6	25423.6	10161.8	19445.5	37488.7	50507.7	22424.2
O95445	Apolipoprotein M	APOM_HUMAN	57367.8	63016.9	39771.7	72371.4	35072.4	53967.4	88012.7	48180.3	84168.2	64093.7	71294.4	46054.9	63471.3	83582.7	56967.2	61585.4	63487.6	52770	63287.5	98307.6	83956.4	100013	112851	60655.2	90343.4	92330.9	23520.8	15893.4	26300.9	49570.7	55595.8	26021.4	38389.7	35827.5	48184.6	41389.2	56100.4	19395.8	8459.03	23220.5	18937.5	31077.3	179954	18489.8	22750.6	39409	56160.9
Q86TH1	ADAMTS-like protein 2	ATL2_HUMAN	1804.09	Filtered	Filtered	Filtered	Filtered	Filtered	Filtered	Filtered	2159.34	Filtered	Filtered	Filtered	Filtered	Filtered	2389	Filtered	Filtered	Filtered	Filtered	Filtered	Filtered	Filtered	Filtered	Filtered	Filtered	Filtered	3970.81	6430.39	3710.23	3357.29	6871.58	2124	5186.94	5950.76	Filtered	Filtered	Filtered	Filtered	Filtered	Filtered	4322.53	3948.44	Filtered	4731.82	7581.64	3150.11	4432.47
Q6UY14	ADAMTS-like protein 4	ATL4_HUMAN	Filtered	Filtered	1675.55	Filtered	1381.41	12168.9	5371.7	3011.84	Filtered	Filtered	18439	3262.52	9760.08	9525.9	11019.3	Filtered	Filtered	Filtered	Filtered	7215.76	Filtered	Filtered	Filtered	Filtered	Filtered	10382.8	5574.62	4402.37	3710.68	3578.22	5273.69	2507.87	6177.66	12657.6	7232.92	7507.99	4604.35	7224.73	13477.7	Filtered	10030.3	6073.88	Filtered	6182.37	5802.47	5322.31	13047
O75882	Attractin	ATRN_HUMAN	31221	35708.8	25732.3	24126.9	27974.7	27380.8	38817.5	34078	44858.7	39784.8	43166.6	33661.9	36909	32671.8	47618.5	34464.1	34938.4	36107.4	37983.9	39694.8	36567.3	31472.7	42878.6	46806.5	102011	14411.5	83236.5	130018	69616.3	41890	37001.1	63040.8	62844.4	114007	42577.2	49465.6	62178.2	42696.6	47100.2	206393	45928.5	128266	129318	51868.2	29575.3	25125.6	84726.4
Q76LX8	A disintegrin and metalloproteinase with thrombospondin motifs 13	ATS13_HUMAN	Filtered	Filtered	Filtered	Filtered	110731	Filtered	Filtered	Filtered	Filtered	Filtered	527.761	1001.24	Filtered	1497.45	497.766	249.962	Filtered	18179.3	78446.9	45855.5	Filtered	Filtered	Filtered	316099	Filtered	1096.59	16853.5	20734.8	Filtered	Filtered	Filtered	8850.47	Filtered	14089.8	Filtered	5199.55	4446.23	18083.8	Filtered	Filtered	Filtered	Filtered	Filtered	Filtered	Filtered	5266.18	8097.55
P61769	Beta-2-microglobulin	B2MG_HUMAN	48400	44614.8	29597.9	19315.3	23535.3	25701.2	34341.3	29871.1	27564.4	35157.7	19783.7	23382.4	21589.9	36090.2	29381.9	22415.6	10804.7	22361.2	20729.9	24899	10708.7	23730	28321.9	20563.9	56595.5	47392.8	29224.8	56470.5	31894	34144.6	22919.7	37693.9	22865.4	43127.8	46325.2	66594.2	52236.8	60514.3	77166	86327.1	26505.7	75302.5	90094.1	27985.2	23032.2	18906.1	53587.1
O43505	N-acetyllactosaminide beta-1,3-N-acetylglucosaminyltransferase	B3GN1_HUMAN	3794.69	Filtered	46210.8	2322.67	20206	Filtered	11679.3	28303.9	4893.6	Filtered	Filtered	Filtered	Filtered	Filtered	Filtered	Filtered	Filtered	Filtered	Filtered	Filtered	Filtered	Filtered	Filtered	Filtered	Filtered	3445.94	Filtered	Filtered	Filtered	Filtered	Filtered	Filtered	Filtered	Filtered	Filtered	Filtered	Filtered	Filtered	Filtered	Filtered	Filtered	Filtered	Filtered	Filtered	Filtered	Filtered	Filtered
Q15582	Transforming growth factor-beta-induced protein ig-h3	BGH3_HUMAN	17019.5	17231.9	9947.13	18581.2	8396.27	13336.4	9584.94	7128.61	5667.47	11230.3	13073.8	16274.6	6522.66	14021	9530.47	14360.2	11939.3	12838	15278.9	12157.3	20441.3	13135.6	15814.1	13254.1	Filtered	9951.24	9162.46	Filtered	2642.38	10898.2	5743.59	5365.22	9208.51	2598.7	5226.04	6019.74	8570.47	8000.48	3373.3	Filtered	694.946	Filtered	Filtered	2047.18	5320.57	6239.65	8889.05
Q9UBW5	Bridging integrator 2	BIN2_HUMAN	2309.28	Filtered	4100.63	Filtered	2594.68	Filtered	5879.57	Filtered	Filtered	1362.69	3023.01	5390.98	Filtered	3262.99	7201.94	Filtered	Filtered	Filtered	Filtered	Filtered	Filtered	Filtered	Filtered	Filtered	Filtered	8178.14	Filtered	12904.1	37326.3	12813.6	26634.2	14957.9	Filtered	Filtered	11258.4	25978.8	21922	17664.4	Filtered	22619	Filtered	Filtered	Filtered	Filtered	Filtered	Filtered	Filtered
Q13867	Bleomycin hydrolase	BLMH_HUMAN	Filtered	Filtered	Filtered	Filtered	Filtered	5561.92	Filtered	Filtered	Filtered	Filtered	1180.83	Filtered	Filtered	Filtered	Filtered	Filtered	Filtered	Filtered	Filtered	Filtered	Filtered	Filtered	Filtered	Filtered	Filtered	11669.9	Filtered	1701.12	6064.16	Filtered	3875.54	2019.81	5943.65	Filtered	9708.81	8869.43	Filtered	6130.6	7279.25	Filtered	4922.04	5870.57	Filtered	4355.61	Filtered	Filtered	Filtered
P30043	Flavin reductase (NADPH)	BLVRB_HUMAN	18609.8	13276.7	12358.3	30089.3	10222.8	Filtered	13751.6	12581.2	Filtered	27882.1	23889.7	21354.3	15224.7	Filtered	10295.5	13637.7	4462.6	4768.23	15347	Filtered	Filtered	4667.5	Filtered	8913.4	Filtered	11762.4	Filtered	3389.54	3037.43	8779.6	8554.53	5157.64	Filtered	Filtered	5052.59	7601.79	Filtered	Filtered	Filtered	Filtered	Filtered	9677.01	Filtered	Filtered	Filtered	Filtered	Filtered
Q10588	ADP-ribosyl cyclase 2	BST1_HUMAN	42100.6	43691.1	34182.9	Filtered	23608.1	52411.5	22196.8	24968.6	39355.7	26612.1	29034.8	Filtered	39795.5	26353.5	23520.9	32487.3	48717.2	Filtered	42636.3	23939.1	Filtered	46149.6	46860.7	25437.5	60560	Filtered	83064.1	61099.2	45535.2	92170.7	20413.6	25624.8	21372.8	67087.7	4230.75	2897.03	4098.93	Filtered	5321.89	Filtered	Filtered	89660.8	123567	117236	37801.9	56634.5	67627.9
P43251	Biotinidase	BTD_HUMAN	162182	133828	117092	114899	118233	126285	148381	108058	112462	117437	76973.5	96480.9	105403	104219	110323	121278	135100	123228	127655	90616.7	122985	93937.5	101316	86449.1	46310.2	148482	197375	168509	134730	170585	130571	152141	211086	188473	238303	233277	334962	347688	229855	92709.9	199814	199125	1.14745e+06	153436	215428	179696	191812
Q86VB7	Scavenger receptor cysteine-rich type 1 protein M130	C163A_HUMAN	27505	30963.4	12179.8	15621.4	2413.49	Filtered	3152.02	3692.96	15711	13383.6	6508.44	2268.43	5076.39	15261.4	14930.3	16262.8	18262.2	Filtered	19018.2	9610	Filtered	24404.1	10484.9	10293.9	98874.6	6585.83	43510	51974.2	43194.3	36367.4	14287.9	19886.1	24979.1	49654.4	39334.6	6184.86	15182.4	Filtered	4813.59	103207	Filtered	67675.4	217818	52805	39287.1	88124.4	65295.1
P02745	Complement C1q subcomponent subunit A	C1QA_HUMAN	210797	122089	178149	212330	149620	105095	117275	194829	164092	270002	218070	230700	78852.1	144916	196772	182867	153883	212371	207371	180555	111705	126217	196982	167771	88768.6	170914	338902	268519	237912	383355	275094	177038	285174	309972	231598	193822	320721	229623	129617	586606	254471	195431	784243	275051	413600	437514	357508
P02746	Complement C1q subcomponent subunit B	C1QB_HUMAN	973897	848860	958036	721840	599895	1.00731e+06	814947	792042	993073	1.08003e+06	1.07533e+06	1.09426e+06	1.03769e+06	1.02705e+06	1.04974e+06	834587	663645	924361	814617	985597	546928	1.03364e+06	936676	787980	2.84693e+06	121649	2120971	1.07607e+06	1.16947e+06	511303	159936	704774	1762577	813117	119516	167843	110948	102966	62092.3	430755	173960	1.92302e+06	4663569	474991	252403	370996	2463863
P02747	Complement C1q subcomponent subunit C	C1QC_HUMAN	731429	645237	686187	984411	629657	970604	767200	802341	793501	979964	804072	957232	964471	734983	731479	674130	576002	990457	695402	667090	882141	1066601	749587	845473	1.09196e+06	1.33451e+06	1.97688e+06	1.2353e+06	1.2859e+06	1.62289e+06	1446147	914227	1.5997e+06	1.7247e+06	1.4162e+06	1.40837e+06	1.35414e+06	1.20223e+06	674810	2.25166e+06	1.52638e+06	1.6251e+06	2.3213e+06	1751719	2.47937e+06	2.01198e+06	2817217
Q9NPY3	Complement component C1q receptor	C1QR1_HUMAN	Filtered	Filtered	Filtered	Filtered	Filtered	Filtered	Filtered	Filtered	Filtered	Filtered	Filtered	Filtered	Filtered	Filtered	Filtered	Filtered	Filtered	Filtered	Filtered	Filtered	Filtered	Filtered	Filtered	Filtered	Filtered	Filtered	Filtered	14112.9	9588.35	15301.4	14757	1240.28	6357.96	Filtered	Filtered	1211.88	Filtered	Filtered	1579.57	60689	Filtered	5689.06	Filtered	2757.5	Filtered	Filtered	Filtered
P00736	Complement C1r subcomponent	C1R_HUMAN	114268	57001.6	123395	97712.9	68355.6	96869	74143.7	156943	84577.2	140001	90841.8	94205.2	81597.6	112568	72583.6	95239.8	100974	92905.4	92681.4	74167.2	100908	84378.4	175992	89678.6	230888	122764	63083.9	76982.7	77883.2	86687	43983.2	34167.9	79324.1	38665.6	91227.4	136892	107560	74464.5	56325.7	163679	53000.3	75275.4	301529	102228	85942.7	99235.3	78187.7
Q9NZP8	Complement C1r subcomponent-like protein	C1RL_HUMAN	10148.6	27770.7	6191.64	12877.2	7688.85	17143.7	15845.6	5572.8	7440.73	9923.81	7930.98	7620.29	9901.38	10899	12546.2	17274.8	15560.4	14419.6	7490.64	10647.1	19842.1	16525.8	8007.27	17746.4	23550.6	13542.6	8768.88	11080.2	11857.7	19827.5	15585.1	9166.69	10006.9	7110.03	8403.2	7529.53	14112.6	6700.48	8623.46	19012.3	4707.52	13702	11791.8	8276.59	11662.1	16112.4	22891.2
P09871	Complement C1s subcomponent	C1S_HUMAN	1.43866e+06	726707	734234	867859	718326	1099880	1.1082e+06	1.11407e+06	1.12455e+06	1.19497e+06	924195	1.21461e+06	1.11583e+06	713910	844381	981428	733466	1.26287e+06	947524	991200	1169572	885513	755422	931861	3042570	1.72225e+06	388652	336418	468995	544874	579832	311939	532831	278706	708908	687998	576626	409277	350573	1225272	588976	751965	2.0968e+06	655298	1.17989e+06	1.04223e+06	897756
P04003	C4b-binding protein alpha chain	C4BPA_HUMAN	56124.2	53996.5	41452.9	78426	47905.9	46348.9	44356.8	31529.1	67252.4	98587.3	48240.6	48564.5	41175.1	58839.1	47208.7	44740.6	35878	86554.6	46516.8	42044.8	72195.7	60037.3	30808.4	39367.7	199188	108771	126919	21312.2	64363.6	22532.9	51148.1	41112.9	71894.3	129743	40650.1	27736.4	53929.7	30458.2	24653	79253.8	47709.2	30842.8	2.10398e+06	29763.3	99624.5	29462.4	72415
P20851	C4b-binding protein beta chain	C4BPB_HUMAN	148302	97425.9	99933.7	65555.9	89409.2	76614	103113	89424.6	132144	97018.2	123554	100183	111740	118780	119843	98148.5	78577	91838.6	116370	106559	91164.6	118777	135019	107001	210232	166678	43558	26441.2	32835.9	28270.7	33625.1	3312.73	26165.3	104159	25269.2	33493.3	14556.6	20756.3	Filtered	34361.8	30953.5	31146.6	77407.8	23724.2	49268.1	31371.5	38930.1
P54289	Voltage-dependent calcium channel subunit alpha-2/delta-1	CA2D1_HUMAN	4502.06	6940.7	11760.3	Filtered	1595.81	5304.47	10737.2	4427.15	6151.26	18594.4	2680.74	1971.72	4132.98	5085.51	1287.25	2441.15	6213.24	Filtered	1573.16	329.82	Filtered	8778.23	1929.5	3130.35	Filtered	10130.5	6637.68	20679.2	8677.04	17525.2	7923.43	8458.4	10639.9	10774.3	14045.4	17657	7172.04	13168	20913.9	18393.4	23867.1	14303.5	56155.7	14303.2	14085.2	8694.71	13580.6
P55290	Cadherin-13	CAD13_HUMAN	8256.31	9726.82	11159.9	12103.5	9802.38	14793.4	7852.14	10445.9	8460.96	15276.2	8647.93	9665.9	10696.9	8168.16	9520.5	16028.6	7668.61	17320.4	16450.6	11511	17711.7	15458	18018.6	10021.4	59871.7	16420.8	2831.62	3292.19	3285.9	5050.53	4033.91	5019.13	8942.7	4036.51	9315.48	15771.4	5606.77	4585.03	2034.44	5949.42	3869.72	3002.64	Filtered	3390.97	10934.7	7009.05	7940.85
P12830	Cadherin-1	CADH1_HUMAN	15215	8660.5	8912.36	5237.21	7966.22	15432.4	8167.38	8042.61	4720.03	6742.37	3596.92	3251.85	6567.64	11452.3	4068.64	10973.6	6139.52	14413	16003.7	8194.25	6395.05	10421.5	15949.1	4240.59	8064.61	16523.5	3395.63	1717.71	Filtered	7639.15	7860.43	2978.53	3284.41	2221.91	4212.48	4925.29	Filtered	Filtered	1227.61	Filtered	3806.92	Filtered	Filtered	5901.31	10307.9	3659.73	Filtered
P19022	Cadherin-2	CADH2_HUMAN	7318.4	11612.5	7984.45	Filtered	8019.23	Filtered	4777.51	6303.67	Filtered	4914.9	3100.48	7024.1	4974.92	5196.48	5930.64	11359.9	9974.29	5001.85	6044.35	Filtered	Filtered	7617.01	Filtered	9115.06	Filtered	2168.96	10347.6	3989.33	1050.77	8751.28	757.335	2492.91	5328.36	Filtered	Filtered	6747.45	Filtered	Filtered	7369.33	Filtered	5362.58	Filtered	Filtered	14763.6	11339.8	Filtered	10924.4
P33151	Cadherin-5	CADH5_HUMAN	27449.8	26873.5	29644.4	35120.8	13942.9	63548.3	22832.8	25814.6	9976.66	33961.8	12807	25482.4	24589.5	21437.3	12692	28001.7	27201.8	47858.8	23938	24664.6	61862.5	54933.1	24424.5	15914.1	191646	92069.7	12550.1	Filtered	Filtered	14287.6	Filtered	9958.5	13457.4	15656.6	3038.64	10904.5	Filtered	Filtered	Filtered	Filtered	5608.54	Filtered	Filtered	7418.76	22029.5	9611.47	8329.89
Q9BY67	Cell adhesion molecule 1	CADM1_HUMAN	4175.38	437.208	2685.95	Filtered	2721.45	2063.93	3180.8	2178.36	2144.86	4391.21	1048.65	1847.19	2294.74	1985.49	2131.08	2526.33	3950.17	1020.87	1599.75	3176.57	3628.35	1409.25	2181.11	1170.55	Filtered	7464.92	7796.38	13022.3	7275.49	13227.8	3297.85	5376.58	2883.8	8319.12	5658.99	4747.8	3827.3	8038.35	5829.12	Filtered	10371.5	9416.74	Filtered	5119.38	9695.61	3531.61	5318.49
P00915	Carbonic anhydrase 1	CAH1_HUMAN	242226	126864	177551	136616	84660.1	60598.8	89475.6	121928	43194.6	181313	158324	104138	149470	33123.9	105456	86417.2	45588.2	46943.3	120321	49400.4	69311.4	27116	37646.7	40182.5	86283.6	129478	169452	292076	283036	386632	114482	153604	98315.4	94683.2	104051	115905	120691	40813.2	172692	1.24414e+06	187871	1.09742e+06	9731742	332711	166505	128102	187413
P00918	Carbonic anhydrase 2	CAH2_HUMAN	34172.8	12405.3	8917.02	7946.92	7934.1	4998.26	8818.06	7411.29	4162.86	16707.7	14294	11941.7	12631	3846.64	9789.59	5794.6	3313.39	Filtered	17535.2	3433.17	6364.42	6344.01	Filtered	1692.57	3122.45	15984.4	17243.1	39827.2	48340.4	59003.2	26300.3	23605	14483.4	11463.7	18600.2	20162.2	8361.45	14031.7	30817.8	429715	26128.3	109080	2.15935e+06	24774.6	24081.4	8502.94	38769.1
Q05682	Caldesmon	CALD1_HUMAN	Filtered	6216.18	Filtered	Filtered	Filtered	Filtered	Filtered	Filtered	Filtered	Filtered	Filtered	Filtered	Filtered	Filtered	2764.34	Filtered	Filtered	Filtered	Filtered	Filtered	Filtered	Filtered	Filtered	9499.34	Filtered	Filtered	Filtered	Filtered	14772.6	6616.31	12982	15624.9	Filtered	Filtered	Filtered	8480.5	Filtered	Filtered	Filtered	Filtered	Filtered	Filtered	Filtered	Filtered	Filtered	Filtered	Filtered
Q9NZT1	Calmodulin-like protein 5	CALL5_HUMAN	Filtered	Filtered	Filtered	Filtered	Filtered	Filtered	1171.06	Filtered	Filtered	Filtered	1872.64	Filtered	Filtered	Filtered	Filtered	Filtered	Filtered	Filtered	Filtered	Filtered	Filtered	Filtered	Filtered	Filtered	Filtered	Filtered	Filtered	Filtered	6995.54	Filtered	Filtered	Filtered	Filtered	Filtered	Filtered	Filtered	Filtered	Filtered	Filtered	Filtered	Filtered	Filtered	Filtered	Filtered	Filtered	Filtered	Filtered
P62158	Calmodulin	CALM_HUMAN	6753.51	10829.5	10267.7	Filtered	4451.51	Filtered	Filtered	5776.94	Filtered	2336.62	8018.69	5120.78	Filtered	Filtered	5684.81	Filtered	Filtered	Filtered	Filtered	Filtered	Filtered	Filtered	Filtered	Filtered	Filtered	9210.26	Filtered	Filtered	10369.7	Filtered	Filtered	Filtered	Filtered	Filtered	Filtered	2914.32	Filtered	Filtered	Filtered	Filtered	Filtered	Filtered	Filtered	Filtered	Filtered	Filtered	Filtered
P31944	Caspase-14	CASPE_HUMAN	Filtered	Filtered	1779.39	Filtered	Filtered	Filtered	Filtered	1111.77	1713.37	4071.4	Filtered	Filtered	14005.7	Filtered	1549.25	Filtered	1525.13	Filtered	Filtered	Filtered	Filtered	Filtered	Filtered	Filtered	Filtered	Filtered	1088.3	2088.64	Filtered	Filtered	Filtered	Filtered	Filtered	Filtered	Filtered	Filtered	Filtered	Filtered	Filtered	Filtered	Filtered	Filtered	9789.93	Filtered	Filtered	Filtered	1850.56
P04040	Catalase	CATA_HUMAN	25012.1	9217.49	12392.4	15519.2	11094.8	6782.81	13211.2	11876.3	8558.12	20809.3	19195.6	13297.5	15053.9	2855.11	11039.5	10638.2	12199.4	6785.3	21764.8	7439.5	10080.8	5000.21	3435.88	2396.07	Filtered	14739	29041	8464.28	15954.4	17798.9	22228.1	20292.3	20164.9	38998.9	24609.5	18761.4	18843.6	10597.6	22288.9	36745.5	20643	59162.3	62400.6	20004.6	20299.7	15286.9	35459.3
P07858	Cathepsin B	CATB_HUMAN	2153.81	Filtered	1460.18	Filtered	Filtered	Filtered	19451.6	Filtered	1300.81	Filtered	12542.5	Filtered	3006.9	Filtered	Filtered	Filtered	1753.3	Filtered	Filtered	Filtered	16417.9	Filtered	Filtered	Filtered	Filtered	21706.7	Filtered	6529.08	11796.5	9195.55	3676.47	31341	Filtered	Filtered	Filtered	6608.14	Filtered	995.415	5945.57	Filtered	2624.83	2166.58	Filtered	2111.35	6365.54	Filtered	69601.7
P07339	Cathepsin D	CATD_HUMAN	7952.55	6785.67	4276.38	2172.97	7074.28	Filtered	2190.33	5147.23	5826.26	Filtered	8807.18	6104.39	6152.41	4035.38	10103.1	2100.04	3155.19	4927.64	4190.98	2580.56	Filtered	Filtered	1683.22	6962.62	Filtered	6039.77	15780.5	10443.7	14434.2	15326.5	9224.11	6696.48	12267.1	23374.9	8758.68	15462.6	6644.29	5857.66	7441.55	50707.3	2509.89	13311.6	Filtered	46001.9	10120.4	5645.43	14606
P07711	Cathepsin L1	CATL1_HUMAN	5622.99	Filtered	4630.48	Filtered	2156.87	2300.24	2938.78	4873.93	3165.68	Filtered	Filtered	2318.48	3216.56	Filtered	8287.47	Filtered	3157.5	8109.56	Filtered	8052.81	Filtered	Filtered	3049.6	764.513	Filtered	8080.41	21745.2	17639.3	13781.6	25084.2	7488.16	8888.25	7045.67	14767.9	8762.67	12112.3	9080.84	8423.13	13622.7	Filtered	6067.51	14344.7	Filtered	13704.4	9759.01	9620	24347.8
P25774	Cathepsin S	CATS_HUMAN	7202.9	13769.1	Filtered	Filtered	Filtered	8874.42	4201.85	Filtered	Filtered	Filtered	Filtered	9456.32	Filtered	Filtered	7649.18	9798.26	Filtered	Filtered	Filtered	Filtered	Filtered	Filtered	Filtered	Filtered	Filtered	6160.09	4768.89	6976.7	5563.4	13607.2	Filtered	Filtered	3471.19	8171.41	11745.2	21448.4	Filtered	Filtered	3052.89	Filtered	9234.05	Filtered	Filtered	5273.8	7764.51	Filtered	6240.95
Q9UBR2	Cathepsin Z	CATZ_HUMAN	21376.6	21056	20546.9	Filtered	14980	14924.8	Filtered	11375.9	9615.58	Filtered	Filtered	Filtered	Filtered	Filtered	Filtered	12037	5993.29	14450.7	9737.53	10817.7	24183.6	Filtered	Filtered	Filtered	Filtered	19971.8	22540.3	34648.2	33021.2	34034	20472.3	12006.7	26379.9	45820.7	16172	22279.9	21044.9	8141.53	20110	33028.8	28412.1	46657.9	Filtered	62491.4	30376.9	20814.4	41484.3
P08185	Corticosteroid-binding globulin	CBG_HUMAN	199110	176714	169092	276820	171028	163507	172461	111463	148462	170369	96098.8	172621	177661	119380	200386	130911	132662	132965	118280	135739	91348.8	137453	69300.7	126556	116825	455024	156847	189823	141028	156352	112728	135894	162242	86584.4	145303	132423	124781	203931	85013.6	182516	104481	145451	320174	74565.4	116613	201440	132062
Q9NTU7	Cerebellin-4	CBLN4_HUMAN	20295.2	14227.2	22841.7	11677.3	13700.2	14265.9	18365.2	11546.3	18198.3	16495.7	7466.61	Filtered	12419.3	Filtered	15715.1	9264.28	14328.9	15746.2	10487.2	13831.7	27803.1	9913.63	21414.4	16014.8	36385.5	12902.9	76401	51356	46341.1	43933	50443	50850.9	29923.8	26946.1	37615.9	36408.1	104819	62475.6	19311.3	31807.5	73100.6	42538.2	250663	22352.7	32253.9	39561.2	47323.4
Q96IY4	Carboxypeptidase B2	CBPB2_HUMAN	105132	55675.8	61153.8	53048.5	40254.6	34379.8	28335	35142	40514.2	59182.3	48374.6	43673.6	40099.9	35077.5	58670.1	65314.9	34466.3	45030.6	68918.7	59841.4	25619.3	56208.3	43648.6	39085.2	Filtered	45139.4	89202.7	81013.7	74521.7	103043	23522.1	24906.6	55253	51241.1	29953.3	76926.2	32699.2	24756.4	17855.2	623489	37229	35160.4	Filtered	38653	51781.6	46025.5	57012.6
P15169	Carboxypeptidase N catalytic chain	CBPN_HUMAN	276492	321102	213288	290972	167981	136777	164252	185738	129033	190731	262432	239288	252060	180160	309059	205568	135067	208607	104974	97277.2	128789	261306	231397	246413	965613	251582	494391	391594	500197	535362	370446	424048	446411	527902	341934	378421	365135	219976	316953	585212	484814	580276	1.02417e+06	546155	599419	714963	757904
Q9Y646	Carboxypeptidase Q	CBPQ_HUMAN	5022.37	3768.46	4314.02	Filtered	4554.48	1020.16	4413.24	3466.72	3524.08	1263.11	1907.06	3124	3574.63	4022.13	2125.43	2249.33	4690.64	Filtered	2505.55	3548.76	2723.4	1430.9	3333.18	Filtered	Filtered	7781.91	8887.25	16810	15127.7	16757	8554.76	9385	29818.3	19947.6	9499.16	7045.74	15490.1	17005.8	12747.4	113409	11412.2	14991.8	Filtered	11133.4	13779.8	9006.09	23021
Q6YHK3	CD109 antigen	CD109_HUMAN	39146.8	Filtered	17207.1	Filtered	1839.89	16665.6	1542.97	4827.36	665.57	Filtered	1837.12	585.813	11414.7	2245.09	1315.03	Filtered	4960.62	1031.88	2781	3684.52	1069.32	Filtered	5260.26	2218.62	Filtered	1821.78	4585.41	3760.19	5148.79	4826.98	1740.36	5004.78	2718.69	6925.19	2339.58	3243.3	2060.71	3620.07	5539.74	67723.1	4646.35	2875.01	Filtered	6666.89	5155.11	3335.48	11928.1
P08571	Monocyte differentiation antigen CD14	CD14_HUMAN	6209.81	15538.3	3178.55	2126.56	2006.59	Filtered	1776.26	1672.68	Filtered	3811.75	1617.21	2318.72	2407.06	2141.81	2268.55	3123.98	2258.84	2892.93	2710.31	Filtered	Filtered	718.208	Filtered	410.871	12080.8	7659.76	5044.26	6530.35	9162.34	23613.3	38766.6	Filtered	8220.21	907.374	9489.12	12394.6	Filtered	Filtered	Filtered	27855.8	Filtered	6467.6	11155.2	8974.9	Filtered	8687.85	4955.13
Q13740	CD166 antigen	CD166_HUMAN	9553.77	6880.65	3394.27	6158.99	9935.29	11531.4	8902.18	8484.99	11206.8	10339.1	4821.06	4113.54	10431.7	10758.3	7015.89	3004.24	11406.1	7490.71	2108.35	3807.88	12067.7	1278.82	7434.69	3152.72	28431.4	17752	21391.2	19546	15628.6	24419.5	14846.1	21270.4	19648.8	18591.5	24702.8	32624.1	32004	33133.2	32472.7	97323.1	32149.7	35840.8	88620.6	39993	29472.8	16012.5	36944.6
P16070	CD44 antigen	CD44_HUMAN	37932.3	26258.6	31885.2	16261.2	26791.1	23610.4	39066.6	25729.6	28210.4	19520.1	16479.2	23347.7	30646.4	27100.8	21453.4	20630.8	32041.9	26713.8	25215.5	20697.5	32393	21162.1	35508.4	21199.8	Filtered	81195.5	110029	167107	92694.8	168906	66082.9	73253.9	60368.9	125741	73040.2	61071.4	58196.9	94712.8	142371	225050	86866.5	125469	1093328	129775	73822.1	38295.3	95517.2
O43866	CD5 antigen-like	CD5L_HUMAN	25588.9	97186	42176	Filtered	67825.7	72744.5	78760.1	94402.4	69543.5	29235.1	41810.1	75045	37520.2	40873.5	36814.5	59319	115066	111184	17872.9	1863.4	68520.1	24845.3	73035	Filtered	246351	135268	Filtered	27663.5	Filtered	41474.9	12686.2	35588.1	17117.5	Filtered	31358.1	81256.2	117720	61069.2	26083.6	84927.6	25223.1	25560.8	575741	32359.1	31954	109772	18226.8
Q9NZK5	Adenosine deaminase CECR1	CECR1_HUMAN	8285.27	7814.18	6465.63	4544.75	5986.12	6134.75	6161.38	5151.75	4044.16	5372.55	3704.02	5551.64	6740.69	9625.19	4789.92	3359.89	11201.2	4304.29	6019.12	4202.34	4993.22	7376.3	3871.2	2308.86	Filtered	9410.15	14693.5	17131	15273	14572.1	16370.1	18493.2	20199.2	26517.3	20972.1	10336.7	16314.9	12840.9	34101.3	60199	24470.6	16339.2	28507.1	25744.2	14424.6	17973.4	22067.2
P00450	Ceruloplasmin	CERU_HUMAN	7.45655e+06	7.61999e+06	5037373	6.97075e+06	6259016	9378778	3.93637e+06	4.72553e+06	12147830	4416315	4.80469e+06	3.88615e+06	6816155	5.10762e+06	5.25118e+06	3503101	5905836	5932182	4386524	4.74468e+06	6170281	4.70759e+06	4.26292e+06	5340625	21819310	10477940	17117112	24106414	18808516	16931544	18725142	17556674	12532110	19977318	13417074	15045904	15635090	21920848	20225142	26477294	25091610	28226052	63136572	19854920	9610292	12451168	18421904
P00751	Complement factor B	CFAB_HUMAN	4289298	4.05187e+06	3.49416e+06	3.93431e+06	4.80179e+06	5215230	4276638	3.27099e+06	7.056e+06	3.98141e+06	4.21125e+06	2.04671e+06	4400364	3605787	4.0852e+06	5.04239e+06	3.30345e+06	4.32389e+06	4.3045e+06	3.29375e+06	5.13673e+06	2984167	3.75101e+06	3.66624e+06	8997713	6116087	7.9267e+06	8601502	3.61898e+06	7761060	5.48826e+06	9774208	7.08613e+06	5999724	9220394	5833296	6.94463e+06	7.82959e+06	7129101	17161386	9923643	8.1771e+06	17774656	11728823	5.11784e+06	4.83717e+06	8324484
P00746	Complement factor D	CFAD_HUMAN	72793.9	70203.5	70910.3	40022.9	58035.3	63750.8	113430	62233.1	65364.4	74914.8	39035.3	70043.4	89416.8	66446.3	69456.6	45960.5	73471.6	84491.1	41223	39121.1	66526.3	39821	54566.7	50519	Filtered	87201.9	151843	164417	155417	62088.2	69732.4	74161.1	51031.8	84770.3	51311.5	88933.3	100048	95174.1	115626	Filtered	82768.1	36829	Filtered	56727.6	7440.37	70840.5	168017
P08603	Complement factor H	CFAH_HUMAN	1.8846e+06	2.08579e+06	1.42913e+06	1.36738e+06	1.58971e+06	1.89932e+06	2.04567e+06	1.22011e+06	2.50263e+06	2002714	1.44763e+06	1.28782e+06	1839984	1.63873e+06	2.28562e+06	1.96382e+06	1.78383e+06	1.77072e+06	1.40978e+06	1331354	1.92228e+06	1.23363e+06	1.54602e+06	1577263	1.6514e+06	2.49973e+06	4.06899e+06	5146004	2.86434e+06	3.36823e+06	2409777	2.13115e+06	2.19303e+06	6095225	2302596	2.73011e+06	2.94073e+06	2.83598e+06	3.02762e+06	10289448	4.12679e+06	4222951	23882988	3.96631e+06	2.84649e+06	2.1485e+06	3.77645e+06
P05156	Complement factor I	CFAI_HUMAN	488314	575092	402408	455614	460614	496724	422528	274739	473582	525387	426510	357265	376239	469591	515695	576804	372945	278314	355062	385804	332005	346843	412306	481110	338158	303793	1.35116e+06	2.93029e+06	1.97266e+06	2735680	1.19443e+06	1.25561e+06	989172	2.04164e+06	711337	877997	326754	710158	518972	2820030	923404	2476610	10593915	1.28632e+06	1006393	774797	1.39604e+06
P61604	10 kDa heat shock protein, mitochondrial	CH10_HUMAN	Filtered	Filtered	Filtered	Filtered	Filtered	Filtered	Filtered	Filtered	Filtered	Filtered	28047.4	Filtered	Filtered	Filtered	Filtered	Filtered	Filtered	Filtered	Filtered	Filtered	Filtered	Filtered	Filtered	Filtered	Filtered	Filtered	Filtered	Filtered	Filtered	Filtered	Filtered	Filtered	Filtered	Filtered	Filtered	Filtered	Filtered	Filtered	Filtered	Filtered	Filtered	Filtered	Filtered	Filtered	Filtered	Filtered	Filtered
P36222	Chitinase-3-like protein 1	CH3L1_HUMAN	1401.55	3487.03	Filtered	Filtered	2161.37	Filtered	Filtered	1320.6	888.539	Filtered	3850.55	1159.84	2319.14	Filtered	1169.74	Filtered	Filtered	Filtered	Filtered	Filtered	Filtered	Filtered	Filtered	Filtered	Filtered	2375.92	2822.54	10391.3	7472.79	5235.71	12810.7	4818.32	834.75	Filtered	4582.33	4183.32	4840.58	3489.45	121370	207027	8664.02	196623	Filtered	27318.4	4560.5	1683.43	6367.92
Q13231	Chitotriosidase-1	CHIT1_HUMAN	Filtered	Filtered	Filtered	Filtered	Filtered	Filtered	3638.38	Filtered	Filtered	Filtered	Filtered	Filtered	19910.4	Filtered	3614.08	Filtered	Filtered	Filtered	Filtered	Filtered	Filtered	Filtered	Filtered	Filtered	Filtered	39339.1	Filtered	66852.7	4955.16	22499.6	4851.6	Filtered	Filtered	Filtered	Filtered	Filtered	13528.6	Filtered	Filtered	Filtered	3985.63	Filtered	Filtered	15444.7	Filtered	8455.09	Filtered
O00533	Neural cell adhesion molecule L1-like protein	CHL1_HUMAN	41728.8	31489.9	37223.7	37680.4	31072	44325	50024.3	40423.5	34589.2	37723.9	25648.4	31076.2	71529	34983	39064.3	33123.4	73511.9	72448.3	36347.4	44690.9	67924.5	44738.2	37998.6	29608.6	134016	53121.1	60442.8	68007.2	56598.3	78010.2	47377.8	94283.4	53504.5	77944.1	51832.9	72083.8	46760.6	56422.9	88835.8	117823	85578.4	80887.4	103847	110724	106315	69158.3	103407
P06276	Cholinesterase	CHLE_HUMAN	177577	228344	221863	164641	169709	208491	193341	171469	213474	296737	151267	144127	199433	292242	227634	221967	161206	205119	194392	191330	163463	342795	201552	215373	444063	148092	1.047e+06	881901	286178	628578	411244	431518	376669	696204	277327	249056	381106	349225	433349	868560	785626	998903	2.61502e+06	737521	430036	542640	575427
P10909	Clusterin	CLUS_HUMAN	194680	241804	158259	154801	119215	107804	148140	122060	84633.2	180830	154095	222358	161885	162578	121683	114273	130456	153940	157933	140983	146093	175534	110105	124483	1.64625e+06	226223	332646	109843	203056	228564	126556	97786.7	326160	498283	293049	240786	194292	108870	81555.3	95328.1	141086	220879	398832	179555	269704	257448	383302
Q96KN2	Beta-Ala-His dipeptidase	CNDP1_HUMAN	61143.3	132338	90044	76311.3	32888.8	76891.2	79558.7	73593.6	53673.7	74447.6	42732.6	64021.3	67656.7	38200.1	42121.9	114020	77299.4	55585.5	83715.7	43196.4	54433.2	57295.6	91931.1	63608.8	190991	84211.6	22219.8	13437.6	29883.4	42160.1	19288.4	20477.3	14303.8	16278.8	43163.2	36996	37152	20284.7	17227.2	22653.4	6233.19	22088	40894.1	35354.4	54928.1	83340.4	44056.6
P26992	Ciliary neurotrophic factor receptor subunit alpha	CNTFR_HUMAN	990.618	Filtered	Filtered	Filtered	Filtered	Filtered	Filtered	862.493	Filtered	Filtered	Filtered	1547.84	Filtered	Filtered	Filtered	Filtered	Filtered	Filtered	Filtered	Filtered	Filtered	Filtered	Filtered	Filtered	Filtered	2448.82	4635.15	Filtered	Filtered	Filtered	Filtered	Filtered	1711.07	6343.12	2928.27	Filtered	Filtered	9149.57	Filtered	Filtered	7866.03	Filtered	Filtered	6046.92	9572.57	7379.09	5994.55
Q12860	Contactin-1	CNTN1_HUMAN	9954.41	6770.52	9414.11	9931.05	8680.46	14539.6	10074.4	15996.1	7899.67	8682.23	6203.02	8241.15	14631.1	9464.41	10053	9321.71	18291.6	11323.2	4577.11	10274.8	8086.2	13524.9	11630.4	10455	22748.5	31116.9	18811.4	29924	23659.1	29893	23488.3	20141	29335.1	22100	24192.7	24457	12937.1	34043.6	42825.6	18478.4	43041.1	28799.8	Filtered	30288.9	33874.7	23592	24555.3
Q9P232	Contactin-3	CNTN3_HUMAN	2169.1	Filtered	Filtered	Filtered	Filtered	Filtered	Filtered	Filtered	Filtered	Filtered	Filtered	2476.4	5717.91	Filtered	Filtered	3287.06	Filtered	Filtered	Filtered	Filtered	Filtered	Filtered	1420.35	Filtered	Filtered	2559.02	10974.6	1710.77	2344.33	Filtered	Filtered	1377.5	3939.07	7387.82	7332.33	804.476	2748.9	2759.28	2387.33	Filtered	366.857	8307.48	Filtered	Filtered	1572.96	2815.93	Filtered
Q8IWV2	Contactin-4	CNTN4_HUMAN	Filtered	809.083	2319.79	Filtered	Filtered	Filtered	1985.92	1918.2	1787.34	Filtered	1696.04	1074.57	2543.41	2098.15	3580.9	1451.25	3159.09	5027.31	Filtered	1850.38	Filtered	3815.78	Filtered	861.403	Filtered	4942.68	13601.4	3340.11	11583.9	32594.4	4480.41	5276.33	4986.58	5726.39	7968.06	5015.16	5546.23	2812.93	4532.94	Filtered	10020.9	10986.5	Filtered	5001.91	13905.8	7339.1	15413.1
P02452	Collagen alpha-1(I) chain	CO1A1_HUMAN	3941.77	Filtered	Filtered	Filtered	8978.3	3484.58	9985.33	2358.48	5360.48	7194.73	2681	2874.54	5198.95	6629.77	2306.66	6425.76	7028.83	8775.47	5339.85	5725.21	4537.68	Filtered	5154.95	Filtered	Filtered	5479.37	5340.93	11030.7	13935.8	11060.2	13154.4	11553.4	8916.76	12164	7703.31	8542.98	6464.92	9140.26	3684.08	Filtered	8583.44	Filtered	Filtered	10837.1	Filtered	Filtered	Filtered
P06681	Complement C2	CO2_HUMAN	454292	344328	245310	255481	273630	361313	319406	219772	403666	312325	235123	166530	323529	301129	308782	252705	279336	326515	324867	270598	280349	325901	268645	267633	1.31585e+06	621701	600844	1.11427e+06	627135	1.39565e+06	459312	506436	521853	90283.6	548272	550810	475361	571950	439195	12989938	549013	964257	9625212	568197	581992	375742	610636
P01024	Complement C3	CO3_HUMAN	327095	480476	190604	316969	351403	386208	269124	430151	461779	412075	301176	488888	329457	397488	652431	448725	407557	389215	468708	379556	309314	392643	476992	605668	1.43537e+06	339615	495931	220373	334855	200954	512408	396657	459770	450999	656482	420155	732650	685103	329671	355038	381698	466434	597721	456498	407101	270719	597733
P02461	Collagen alpha-1(III) chain	CO3A1_HUMAN	Filtered	Filtered	Filtered	Filtered	Filtered	Filtered	Filtered	Filtered	Filtered	Filtered	Filtered	Filtered	Filtered	Filtered	Filtered	Filtered	Filtered	Filtered	Filtered	Filtered	Filtered	Filtered	Filtered	Filtered	Filtered	Filtered	Filtered	Filtered	553.847	Filtered	Filtered	Filtered	Filtered	719.823	Filtered	1714.2	Filtered	1589.42	Filtered	Filtered	Filtered	Filtered	Filtered	Filtered	Filtered	Filtered	766.588
P0C0L4;P0C0L5	Complement C4-A;Complement C4-B	CO4A_HUMAN;CO4B_HUMAN	3.83028e+06	2548621	2.29289e+06	3344256	3.92653e+06	2565025	3.17707e+06	3.46577e+06	4858984	3.5593e+06	3.38448e+06	2.8547e+06	4.46395e+06	2.62638e+06	4521739	3.90193e+06	1.93869e+06	2.18739e+06	2.89328e+06	5795159	1.91682e+06	3.18232e+06	2.73874e+06	4.89661e+06	11351614	2158951	6.14589e+06	3.51405e+06	2.26476e+06	1427859	2128221	2.69845e+06	5.29598e+06	1657189	3.34443e+06	2.04406e+06	3.62038e+06	3.38849e+06	1.20617e+06	2.36721e+06	1.01166e+06	2.38767e+06	7.70622e+06	2.72095e+06	2.93126e+06	2.25838e+06	3.47767e+06
P01031	Complement C5	CO5_HUMAN	1.1328e+06	914938	871628	1.1354e+06	750029	967197	930638	737993	1.02348e+06	933009	748001	1.07261e+06	1.19805e+06	1.11346e+06	1042257	852855	645266	844154	831091	863777	977257	1.35708e+06	707953	922909	3.1434e+06	804989	1.42869e+06	1159512	1.28186e+06	1436818	1.3677e+06	1.23086e+06	526312	812617	762542	1.0019e+06	530707	638089	660414	2.85694e+06	1.20142e+06	1651343	10858823	1.6127e+06	1869679	1.23269e+06	1.8485e+06
P13671	Complement component C6	CO6_HUMAN	455377	630397	550111	630749	385108	776234	495039	370382	519845	429961	430413	354201	450223	635582	681590	628188	420982	510805	440572	426480	562084	587646	557226	492747	1.37572e+06	584167	446026	375987	474983	585033	602899	424716	645018	468211	507752	380849	388217	274370	287623	723611	495830	627266	1.75735e+06	650480	660251	973417	912078
P12111	Collagen alpha-3(VI) chain	CO6A3_HUMAN	2724.49	Filtered	2268.53	Filtered	1520.64	Filtered	1546.62	2333.55	427.464	Filtered	703.741	1629.17	1521.79	1998.07	1113.16	1465.77	1209.56	527.188	Filtered	779.548	Filtered	Filtered	Filtered	Filtered	Filtered	2859.78	Filtered	Filtered	Filtered	Filtered	Filtered	Filtered	Filtered	Filtered	792.611	1749.58	Filtered	Filtered	Filtered	Filtered	Filtered	Filtered	Filtered	Filtered	4237.95	Filtered	Filtered
P10643	Complement component C7	CO7_HUMAN	171497	147844	82596.4	109865	70387.5	94388.6	93233.9	95832.5	80081	104162	60859.9	109040	84478.5	237242	133687	91126.9	155174	150491	141668	99797	92799.8	139370	76173.3	104801	201896	155739	163242	371167	307470	569363	125553	111057	122756	118292	87208.8	189440	63012.2	94089.6	122509	1.10503e+06	176646	163421	610925	185571	299886	194513	165601
P07357	Complement component C8 alpha chain	CO8A_HUMAN	99264	85740.5	139314	125483	85231.1	68705.3	75813.7	84680.5	63145.7	83211.5	104423	138531	63293.1	100281	126325	89113.5	81645.8	135853	152227	79273.8	122153	95732.9	100220	101807	182777	33116.3	84291.5	56453.3	118807	117966	61649.4	104164	79483.2	119769	46990.4	90152.1	133263	27537	72797.9	192815	27144.2	82800.9	418409	101932	99287.9	166065	149538
P07358	Complement component C8 beta chain	CO8B_HUMAN	19336.1	38246.3	39455.6	34996.7	18072.3	14470.9	16250.3	24027	12979.7	26932	44898.5	54895.1	19136.1	35998.8	43528	24473.5	12002.3	22606	29197.1	15600.8	23534.5	21698.3	17608.6	43944.1	12209.3	18722.5	15093.5	5476.93	13785.4	17361	6852.1	10737.7	11425.3	15953.3	26164.7	27708.6	8782.34	17862.7	2478.1	7924.15	2801.41	156641	Filtered	135844	25128.8	38819.9	121033
P07360	Complement component C8 gamma chain	CO8G_HUMAN	152717	169280	157399	139053	81531.8	78448.9	78121.8	85326.1	68077.8	125113	173362	199668	124746	150590	178939	124121	86264.1	119796	142815	77504.1	81292.6	147896	99334.6	194899	202716	159714	182509	57107.8	130039	151029	103517	87027.5	148384	73489.8	333517	383270	216496	123314	136291	227162	109664	102365	187089	142951	251029	202843	227436
P02748	Complement component C9	CO9_HUMAN	49356.2	49121.5	38993.1	52066.6	27012.9	23183.7	24956.4	27703.2	18572.9	38733.5	45343.2	57861.9	24681.7	52116.2	34049.1	23056.6	26998.2	39253.5	36032.9	28261.8	40652.8	33028	23316.7	50612.8	22766.1	52613.6	36136.7	23852.8	25039.7	22239.4	21223	15182.4	27554.4	6887.4	20291.7	23576.8	14943	6671.67	2208.18	Filtered	3302.65	8960.43	Filtered	31444.9	24086.4	45838.6	29584.1
P39060	Collagen alpha-1(XVIII) chain	COIA1_HUMAN	3409.71	Filtered	3825.02	Filtered	2958.36	Filtered	4831.36	Filtered	2525.35	Filtered	3497.91	Filtered	2296	Filtered	3430.11	Filtered	Filtered	Filtered	Filtered	Filtered	Filtered	Filtered	Filtered	1677.14	Filtered	Filtered	14444.9	19701	16580.2	15381.3	7962.51	Filtered	Filtered	10234.8	Filtered	11552.9	6237.61	6532.58	5827.84	Filtered	7481.83	18836	Filtered	14598.7	7342.93	5288.52	14535.8
Q9Y6Z7	Collectin-10	COL10_HUMAN	6599.39	Filtered	3742.59	Filtered	2708.67	Filtered	2199.83	2539.67	2289.06	Filtered	2977.46	3338.65	2373.91	Filtered	3436.27	Filtered	Filtered	Filtered	Filtered	Filtered	Filtered	Filtered	Filtered	2943.81	Filtered	Filtered	Filtered	Filtered	Filtered	Filtered	Filtered	Filtered	Filtered	Filtered	Filtered	Filtered	Filtered	Filtered	Filtered	Filtered	Filtered	Filtered	Filtered	Filtered	Filtered	Filtered	Filtered
P49747	Cartilage oligomeric matrix protein	COMP_HUMAN	39539.5	44589.6	18695.9	37076.1	22410.1	31640.2	32008.8	25759.4	12140.1	33360.5	31642	33051.4	36590.4	41142.5	20715.5	32027.8	37790.1	38666.4	30192	27395.3	30571.2	40378.1	59963.8	29092.6	208721	40656.5	11389.6	5936.57	6564.87	13035.1	9506.91	8619.19	16770.5	16235.1	11145.2	21631	6520.76	984.324	Filtered	9022.07	12561.8	1566.85	Filtered	14119.5	26485	16984	14902.8
P22792	Carboxypeptidase N subunit 2	CPN2_HUMAN	362258	359927	260068	352042	203013	143125	166298	187605	118081	231962	252558	280401	296452	233561	333049	292982	115614	217259	161674	79525.8	145290	220792	292537	266243	1.08649e+06	284870	411962	270636	458229	427506	271422	326275	401903	443210	407570	416022	257065	209391	195636	461009	365662	481869	723094	369814	621666	620870	601205
P20023	Complement receptor type 2	CR2_HUMAN	Filtered	10991.1	9117.92	9017.79	Filtered	Filtered	Filtered	6670.19	5255.87	Filtered	2861.74	5940.99	2339.87	6006.54	Filtered	Filtered	Filtered	Filtered	Filtered	Filtered	Filtered	Filtered	6509.23	4517.31	Filtered	4966.38	11883.7	12544.7	6099.4	11816.6	6347.72	5953.41	5355.17	15592.7	13779	9812.19	10292.9	6502.78	8965.18	Filtered	11826.3	13409.8	Filtered	11795.5	12224.8	10076.9	9417.06
Q9NQ79	Cartilage acidic protein 1	CRAC1_HUMAN	39960.1	39142	40999.6	80560.2	49265.8	60312.7	58384.7	55701.9	48838.9	39217.5	45475.2	34435.8	41021.8	68650.2	58396	44901.4	47238.8	49679	32983.7	55976.9	22636.9	60799.7	64736.1	37315.9	121429	76026.2	76604.7	87560.5	82959.1	92205.5	102103	69817.2	136369	157418	77267.6	53118.1	59093.9	91688.5	144311	163080	144740	93046	88911.2	161873	164464	138931	164902
P54108	Cysteine-rich secretory protein 3	CRIS3_HUMAN	1639.15	Filtered	2711.24	1506.8	1952.98	2599.5	3689.15	4622.48	2990.52	2655.28	Filtered	3028.56	2226.32	1396.91	1795.15	2446.61	2935.87	4799.73	2711.1	2118.95	4742.04	4163.19	2504.97	2914.72	6252.48	Filtered	4217.91	5478.86	4702.78	7603.45	12217.9	10792	6201.59	11142.4	Filtered	Filtered	Filtered	Filtered	Filtered	Filtered	7318.07	5491.87	7132.84	4898.46	6972.19	5241.13	4960.62
P02741	C-reactive protein	CRP_HUMAN	18062	76970	10096.1	11292.9	11733.7	19104.1	11474	32017.4	158815	19876.7	23373.7	11620.7	20295	12371.6	19984.4	23873.9	14505.9	Filtered	Filtered	26783	Filtered	Filtered	Filtered	88604.8	Filtered	10985.7	80713.5	117316	82127.7	Filtered	89671.4	15532.6	26260.6	25321.7	23983.7	Filtered	Filtered	91695.9	Filtered	830496	34209.4	785562	59685.9	967061	3809.96	Filtered	43694.4
P07333	Macrophage colony-stimulating factor 1 receptor	CSF1R_HUMAN	13832.3	13661.5	13764.4	10695.8	8318.94	16246.3	17028.3	9205.81	10076.2	14195.1	10285.7	12945.7	10740.4	9680.56	11562.1	9762.04	16377	15895.9	9486.83	14539.1	8504.48	13962.4	13112.5	13910.2	Filtered	12546.5	22673	17088.5	18010.8	31482	12302.5	22119.3	12717.3	21484.1	19605.7	13666	18533.4	13249.4	19479.5	Filtered	17818.6	26063.7	Filtered	22727.8	30239.3	17395.7	17018.6
P02775	Platelet basic protein	CXCL7_HUMAN	1.0636e+06	745341	877344	800588	1.01e+06	855842	832830	1.02127e+06	1.02955e+06	598484	568373	414463	637851	473622	527147	887328	594877	368434	699384	884305	441279	631411	1.14143e+06	435839	2731263	1.38264e+06	2.36976e+06	2.1984e+06	2694587	4074468	2.34452e+06	2.18835e+06	1.56366e+06	3.62648e+06	1688762	2.03475e+06	1.61348e+06	1.3487e+06	564957	3.2204e+06	1.20235e+06	2.25586e+06	22523580	1.16828e+06	873464	1.34265e+06	1.9818e+06
P01040	Cystatin-A	CYTA_HUMAN	7913.33	2670.82	21661.9	Filtered	1763.23	Filtered	1803.22	1720.13	2298.79	Filtered	Filtered	Filtered	8099.51	Filtered	Filtered	5168.49	Filtered	3256.27	1288.08	Filtered	Filtered	2225.73	Filtered	44070.4	Filtered	3724.23	3447.11	4648.98	4512.77	4485.33	4895.1	4710.47	3753.77	8066.76	4554.96	7152.01	7526.53	9018.97	10271.8	Filtered	5633.62	169572	Filtered	4760.48	3989.74	7602.17	6910.69
P01034	Cystatin-C	CYTC_HUMAN	132647	107292	80623.8	56649.8	55089.6	88162.8	83864.3	59910.6	63123.7	93148.1	53777.7	82612.8	81866.9	78057.1	69950.1	63495.7	95034	84331.8	63931.7	63316.7	74952.4	90252.1	71189.7	64625.4	145205	52523.4	161608	111063	87217.3	178349	101046	51660	136463	258107	101551	89316.9	147854	110725	133853	400334	127059	76512.3	1.81273e+06	258968	195255	99590.7	297394
P08174	Complement decay-accelerating factor	DAF_HUMAN	6521.2	Filtered	Filtered	Filtered	Filtered	Filtered	Filtered	4004.17	Filtered	Filtered	3844.74	Filtered	1618.94	Filtered	Filtered	Filtered	4559.34	Filtered	Filtered	Filtered	Filtered	Filtered	Filtered	Filtered	Filtered	Filtered	Filtered	Filtered	Filtered	Filtered	Filtered	Filtered	Filtered	Filtered	Filtered	Filtered	Filtered	Filtered	Filtered	Filtered	Filtered	Filtered	Filtered	Filtered	Filtered	Filtered	Filtered
Q8N8Z6	Discoidin, CUB and LCCL domain-containing protein 1	DCBD1_HUMAN	Filtered	Filtered	Filtered	Filtered	Filtered	Filtered	Filtered	Filtered	Filtered	Filtered	Filtered	Filtered	Filtered	Filtered	Filtered	Filtered	Filtered	Filtered	Filtered	Filtered	Filtered	Filtered	Filtered	Filtered	Filtered	2075.4	Filtered	8983.87	4777.3	7648.82	4382.71	1835.09	Filtered	7856.48	Filtered	Filtered	Filtered	Filtered	Filtered	Filtered	Filtered	1928.18	Filtered	Filtered	5496.42	4793.08	7447.94
P81605	Dermcidin	DCD_HUMAN	1396.04	4364.33	Filtered	5354.63	2252.54	Filtered	2516.17	2584.39	1957.25	12643.9	1816.96	2389.3	Filtered	Filtered	4506.02	1815.45	6122.48	4427.52	Filtered	40409.8	4381.01	4530.63	Filtered	1755.8	Filtered	237.128	404.631	568.982	240.149	Filtered	946.988	2367.33	Filtered	5048.59	Filtered	Filtered	1370.94	1982.43	Filtered	Filtered	Filtered	Filtered	Filtered	Filtered	Filtered	Filtered	Filtered
P59665;P59666	Neutrophil defensin 1;Neutrophil defensin 3	DEF1_HUMAN;DEF3_HUMAN	Filtered	6148.82	Filtered	Filtered	8997.47	Filtered	Filtered	Filtered	Filtered	8656.29	9611.99	9712.33	5461.23	Filtered	7616.82	Filtered	Filtered	Filtered	5964.94	4869.4	Filtered	Filtered	Filtered	Filtered	Filtered	15129.5	Filtered	9861.96	13878.7	10744	Filtered	Filtered	Filtered	Filtered	Filtered	Filtered	Filtered	Filtered	Filtered	65715.2	21821.6	24652.9	73152.3	Filtered	Filtered	Filtered	Filtered
P15924	Desmoplakin	DESP_HUMAN	7321.23	Filtered	Filtered	Filtered	28747.8	65671	Filtered	Filtered	31578.6	Filtered	Filtered	Filtered	Filtered	Filtered	351.74	Filtered	1375.31	Filtered	Filtered	11184.1	234762	Filtered	132829	Filtered	Filtered	Filtered	Filtered	Filtered	11291.3	Filtered	29295.1	Filtered	2499.48	36629.4	38182.5	Filtered	Filtered	31057.6	Filtered	Filtered	Filtered	Filtered	Filtered	Filtered	18863.2	42070.4	Filtered
Q01459	Di-N-acetylchitobiase	DIAC_HUMAN	23942.3	9604.83	17682.1	10942.9	13662.6	12804.3	16101.6	12746.9	13844	14037.8	12213.8	14664.8	11671.9	10906	11612.3	14654.9	12945.8	14397.3	10718.2	13701.8	20801.9	14983.3	11521.6	13941.3	47626.6	2427.28	58016	73237	55282.9	82946	41976	57188.4	75312.5	96361	7341.94	7803.06	6112.12	5424.35	9773.17	Filtered	7394.06	111315	241316	83610	76706.1	36217.4	92889.4
P80370	Protein delta homolog 1	DLK1_HUMAN	Filtered	Filtered	Filtered	Filtered	Filtered	Filtered	Filtered	Filtered	Filtered	Filtered	Filtered	Filtered	Filtered	Filtered	Filtered	Filtered	Filtered	Filtered	Filtered	Filtered	Filtered	Filtered	Filtered	Filtered	Filtered	Filtered	Filtered	Filtered	Filtered	Filtered	Filtered	Filtered	Filtered	Filtered	Filtered	Filtered	Filtered	Filtered	Filtered	Filtered	Filtered	Filtered	Filtered	Filtered	Filtered	Filtered	Filtered
P09172	Dopamine beta-hydroxylase	DOPO_HUMAN	47580	103278	135088	9477.41	47270.4	112701	27916.2	54579.5	51211	19405.5	39784.1	42706.7	59078.3	47079.5	25338.8	30396.5	74413.2	106933	43190.4	108324	31016.4	95492.8	99479	50973	52367.6	40946.1	262301	390212	265655	300426	216227	71390.5	184238	294274	65142	209419	10287.3	199639	116256	215196	220991	178306	376391	201992	62652.2	111743	168901
Q9H4A9	Dipeptidase 2	DPEP2_HUMAN	1015.61	837.192	3572.2	595.804	1655.67	827.755	1822.05	1267.56	Filtered	3043.4	1403.91	1211.93	1820.71	807.576	4799.55	5611.84	1180.21	1881.41	2179.66	2417.64	Filtered	834.185	1577.24	797.881	Filtered	3122.08	Filtered	Filtered	528.276	Filtered	565.842	3259.57	1176.51	1279.08	1470.13	Filtered	Filtered	375.165	Filtered	7550.01	Filtered	7602.54	Filtered	Filtered	6693.57	2555.27	Filtered
Q9UHL4	Dipeptidyl peptidase 2	DPP2_HUMAN	Filtered	Filtered	Filtered	Filtered	Filtered	Filtered	Filtered	Filtered	Filtered	Filtered	Filtered	Filtered	Filtered	Filtered	Filtered	Filtered	Filtered	Filtered	Filtered	Filtered	Filtered	Filtered	Filtered	Filtered	Filtered	Filtered	Filtered	18266.2	11944.9	7703.59	16611.2	11320.3	4330.22	Filtered	Filtered	6823.24	13929	16498.8	Filtered	Filtered	Filtered	Filtered	Filtered	11834.4	4495.11	Filtered	6872.9
P27487	Dipeptidyl peptidase 4	DPP4_HUMAN	449.213	Filtered	Filtered	Filtered	Filtered	Filtered	2391.42	263.092	Filtered	689.27	349.556	404.483	1742.63	1818.75	1026.6	342.924	Filtered	Filtered	Filtered	Filtered	Filtered	Filtered	2030.65	Filtered	Filtered	2948.25	4608.1	11458.1	3868.81	4771.37	1411.79	2251.97	6626.88	9017.21	5510.58	7459.12	Filtered	1622.78	6893.04	10837.3	630.847	7810.27	21199.9	Filtered	12344.4	1070.36	Filtered
Q08554	Desmocollin-1	DSC1_HUMAN	5771.55	Filtered	4715.82	Filtered	Filtered	Filtered	Filtered	3382.88	Filtered	Filtered	Filtered	Filtered	Filtered	Filtered	Filtered	1083.46	Filtered	Filtered	Filtered	Filtered	Filtered	Filtered	Filtered	940.783	Filtered	3268.89	Filtered	19328.7	6989.77	8759.85	Filtered	5534.42	2927.57	Filtered	4371.73	Filtered	11787.7	Filtered	Filtered	14111.4	Filtered	Filtered	48238.5	9867.25	Filtered	Filtered	Filtered
Q14574	Desmocollin-3	DSC3_HUMAN	9483.68	Filtered	21412	Filtered	Filtered	Filtered	10585.9	12550.3	7849.26	Filtered	Filtered	4553.43	3505.7	6040.07	5770.31	28523.3	4143.67	6794.37	5743.69	9968.31	Filtered	Filtered	10991.3	Filtered	Filtered	9358.86	17738.9	26959.4	24273	9883.16	18453.4	15005.6	10097.5	20837.7	10206.6	17391.2	10923.8	24211.2	Filtered	Filtered	6370.61	Filtered	Filtered	Filtered	9340.08	4201.59	Filtered
Q14126	Desmoglein-2	DSG2_HUMAN	8874.28	Filtered	7171.64	Filtered	Filtered	Filtered	4889.18	7067.87	Filtered	Filtered	3303.52	6974.76	3162.36	4716.47	2367.08	3264.88	6624.07	9315.99	3869.41	5150.1	Filtered	4908.91	8542.47	Filtered	Filtered	8455.47	Filtered	Filtered	Filtered	Filtered	Filtered	Filtered	Filtered	Filtered	Filtered	1492.19	Filtered	Filtered	Filtered	Filtered	Filtered	Filtered	Filtered	Filtered	Filtered	Filtered	Filtered
Q16610	Extracellular matrix protein 1	ECM1_HUMAN	430168	427885	438908	438564	338313	242247	248750	338103	485707	273383	199819	395780	412472	265761	331056	352622	605600	339668	287837	376789	314774	307481	382268	340866	898844	589016	747080	547886	554206	685772	404807	546485	719312	1.1465e+06	421022	786351	567033	509450	725835	885367	624684	814900	7521245	614005	608278	485760	778978
P68104;Q05639;Q5VTE0	Elongation factor 1-alpha 1;Elongation factor 1-alpha 2;Putative elongation factor 1-alpha-like 3	EF1A1_HUMAN;EF1A2_HUMAN;EF1A3_HUMAN	Filtered	Filtered	Filtered	Filtered	2356.24	Filtered	2228.49	1348.33	Filtered	3990.54	77342.6	9130.56	Filtered	Filtered	Filtered	Filtered	Filtered	6041.55	4105.53	3021.38	12389.5	1529.05	Filtered	Filtered	Filtered	Filtered	4203.52	Filtered	38522.4	Filtered	Filtered	Filtered	Filtered	Filtered	Filtered	Filtered	Filtered	Filtered	Filtered	Filtered	Filtered	Filtered	Filtered	Filtered	Filtered	Filtered	Filtered
P00533	Epidermal growth factor receptor	EGFR_HUMAN	Filtered	Filtered	Filtered	Filtered	Filtered	Filtered	1704.1	Filtered	Filtered	Filtered	Filtered	1351.13	Filtered	Filtered	Filtered	Filtered	Filtered	Filtered	Filtered	Filtered	Filtered	Filtered	Filtered	Filtered	Filtered	Filtered	5084.4	Filtered	Filtered	Filtered	5115.76	1941.45	5184.41	6316.33	5323.45	886.811	3011.5	3105.99	2718.91	Filtered	Filtered	Filtered	Filtered	Filtered	Filtered	5987.26	Filtered
P17813	Endoglin	EGLN_HUMAN	3561.85	Filtered	3478.11	2620.97	2233.55	Filtered	1905.38	3467.49	Filtered	3404.46	3374.62	4755.88	2730.99	4128.23	2979.83	2185.83	3633.21	Filtered	Filtered	2500.47	Filtered	Filtered	2280.7	1922.43	Filtered	4073.08	Filtered	Filtered	Filtered	Filtered	Filtered	Filtered	2823.87	Filtered	Filtered	Filtered	Filtered	Filtered	1720.34	Filtered	Filtered	Filtered	Filtered	Filtered	1975.96	Filtered	Filtered
P06733	Alpha-enolase	ENOA_HUMAN	10724	5660.1	Filtered	Filtered	6573.03	Filtered	3659.16	3711.4	Filtered	Filtered	58721.8	7257.08	514.81	Filtered	9426	Filtered	Filtered	Filtered	Filtered	6690.37	Filtered	Filtered	Filtered	136442	Filtered	4716.32	6128.04	9415.75	Filtered	Filtered	Filtered	5118.26	Filtered	Filtered	78032.7	4423.82	Filtered	Filtered	Filtered	14088.7	Filtered	Filtered	Filtered	Filtered	Filtered	Filtered	7209.19
Q13822	Ectonucleotide pyrophosphatase/phosphodiesterase family member 2	ENPP2_HUMAN	12871.4	12343.8	11435.1	9978.8	9413.32	11228.4	10964.3	8734.98	11082.9	12962	9315.15	7768.85	9646.78	9001.05	9557.54	7562.75	15270.8	11539.4	10926	13119.5	19869.8	11087.7	5251.46	7913.41	Filtered	15959.7	22895.4	31620.3	21529.4	64907.6	15968.8	16235.7	16431.2	5640.2	16006.2	17496.6	17804.2	16525.3	34509.2	386062	44725.7	43157.2	Filtered	37513.2	33727.8	16940.9	60530
Q9UNN8	Endothelial protein C receptor	EPCR_HUMAN	29044.3	15864.9	15702.9	7978.78	11934	13645.7	15155.4	27512.3	12335.2	17477.3	6898.25	29839.2	38229.4	12119.6	11993.1	13212.3	20265.5	47946.8	13031.7	16622.6	15404.3	14890	14315.4	8460.71	Filtered	15977	42869.5	35610.6	19719	28683.5	9433.52	19667.4	26588.5	49232.5	29047.1	32594.8	32022.7	40451.4	74122.2	Filtered	28415	26009.6	Filtered	45994.8	63639.7	20720.7	38877.9
Q9NZ08	Endoplasmic reticulum aminopeptidase 1	ERAP1_HUMAN	Filtered	Filtered	Filtered	10641.6	7800.85	Filtered	4756.77	12945.7	Filtered	Filtered	Filtered	Filtered	Filtered	Filtered	5649.06	Filtered	Filtered	Filtered	Filtered	Filtered	Filtered	Filtered	Filtered	Filtered	Filtered	Filtered	Filtered	3035.57	2921.05	8212.6	5132.14	6272.23	5847.67	17884.5	962.206	3666.19	4375.94	3145.37	3918.55	Filtered	7327.37	Filtered	Filtered	9721.02	3771.41	2874.7	Filtered
P00488	Coagulation factor XIII A chain	F13A_HUMAN	6460.4	Filtered	7796.06	Filtered	3384.02	11615.7	10873.9	6341.02	11941	Filtered	Filtered	Filtered	Filtered	932	5494.17	5419.9	4927.41	2320.42	Filtered	1707	12413.9	14428.5	5543.14	Filtered	Filtered	30084.1	22712.7	14136.7	42367.4	29200.9	42017.1	28691.4	33534.1	93334	35523.7	22154.4	19958.9	26131.7	15419.2	Filtered	46605.2	21847.9	Filtered	39412.8	27087	21903.7	76925.4
P05160	Coagulation factor XIII B chain	F13B_HUMAN	2569.59	Filtered	Filtered	Filtered	Filtered	Filtered	2027.56	376.07	Filtered	Filtered	Filtered	Filtered	Filtered	Filtered	Filtered	Filtered	Filtered	Filtered	Filtered	Filtered	Filtered	Filtered	Filtered	Filtered	Filtered	4994.51	Filtered	Filtered	Filtered	Filtered	1831.56	171.853	Filtered	Filtered	Filtered	1760.04	Filtered	Filtered	Filtered	Filtered	Filtered	Filtered	Filtered	Filtered	Filtered	Filtered	Filtered
P00742	Coagulation factor X	FA10_HUMAN	447998	472855	442683	305899	282317	402623	336167	329112	228829	312593	528678	458576	354494	344866	359970	426670	282779	310147	278589	244498	268918	408534	305817	373177	743795	494204	93106.3	44622.8	125080	248346	171709	215303	160042	15014.7	229978	161396	116396	91097.4	10294	78029.2	111991	115255	406183	58698.1	258346	259003	144098
P03951	Coagulation factor XI	FA11_HUMAN	49134	73493.9	56400.2	54641.7	44510.3	52305	80040.5	44718.9	60416.3	43230.9	54108.6	50055.9	49520.5	40118.4	46195.4	41904.8	27134.7	47368.7	45479.7	21848.3	31807.2	33229.2	13310.1	33157.4	81230.5	108465	89050.7	235531	193965	274273	117156	135273	160715	182508	107498	97465.1	114897	118382	68243.8	253909	69503.2	94707.2	373891	82937.3	51994.1	52743	98936.9
P00748	Coagulation factor XII	FA12_HUMAN	89439	86474.2	57187.3	153261	48144.7	27007.6	52290.4	58547.1	87861.5	88307.3	51388.5	78701	120401	95617.4	46395.9	56552.6	41560.6	54476	97221.2	96737.1	15874.5	28068.8	51628.7	58539.4	143196	131089	43577.4	137112	101904	184268	44973.4	69654.9	49666.9	74105.4	51905.5	63613.4	39260.2	42333.4	64601.6	55712.2	51880.3	121525	182173	28019.5	49828.6	57236	97763.9
P12259	Coagulation factor V	FA5_HUMAN	39634	33352.7	18076.2	21511.3	32464	23153.2	21724	23264.4	23569.9	29481	25616.8	29053.1	42152.8	30093.6	33240.9	15343.2	19331.2	18639.7	18808.8	18921.5	11515.5	17933.4	21924.3	26304.2	36665.1	15590.3	53080.2	20535.2	45402.2	29147.7	47269.5	25669.9	83832.2	61221.9	53622.3	64520.1	61932	42753.1	27138.6	79282.5	55199.7	56468.3	78577.7	35120.3	75185.9	50022.8	114124
P08709	Coagulation factor VII	FA7_HUMAN	Filtered	Filtered	Filtered	Filtered	Filtered	Filtered	Filtered	Filtered	Filtered	Filtered	Filtered	Filtered	Filtered	Filtered	Filtered	Filtered	Filtered	Filtered	Filtered	Filtered	Filtered	Filtered	Filtered	Filtered	Filtered	3496.65	Filtered	6328.66	5475.33	9988.21	Filtered	Filtered	Filtered	Filtered	Filtered	2005.45	Filtered	Filtered	Filtered	5209.23	Filtered	1124.32	Filtered	Filtered	Filtered	Filtered	Filtered
P00740	Coagulation factor IX	FA9_HUMAN	9848.54	8401.69	16015.9	6094.06	13613	12865	14666.3	14071.4	11304.6	7961.56	20948.2	12637.5	11599.8	9671.19	18961.6	17990.9	12480.1	9703.68	13021.3	16861.3	9188.25	12212.1	10463.9	27504.5	Filtered	13890.5	922.163	23127.9	3069.99	4458.71	6540.81	3315.65	3246.38	4723.31	5570.44	5641.3	900.264	2471.59	4032.45	131402	1551.7	2847.03	1364269	1853.95	5371.81	4261.97	805.355
P16930	Fumarylacetoacetase	FAAA_HUMAN	Filtered	Filtered	Filtered	Filtered	4672.99	Filtered	4882.95	Filtered	1431.6	Filtered	4113.38	10067.3	Filtered	4225.01	3775.17	Filtered	922.895	Filtered	Filtered	1119.4	Filtered	31880.2	Filtered	Filtered	Filtered	1198.18	10320	21934.9	10568	11922.8	7384	9106.02	10366.3	4652.85	4508.81	12466.5	Filtered	10144.8	11614.1	Filtered	3046.18	26324.7	153746	Filtered	Filtered	Filtered	Filtered
Q92520	Protein FAM3C	FAM3C_HUMAN	1999.1	Filtered	877.282	Filtered	Filtered	Filtered	Filtered	Filtered	Filtered	Filtered	Filtered	1877.59	Filtered	Filtered	1677.8	859.372	Filtered	Filtered	Filtered	1164.95	Filtered	Filtered	Filtered	Filtered	1927.61	53.6388	4112.53	6785.17	4791.08	8736.59	4612.21	2274.08	2063.43	7314.05	Filtered	Filtered	Filtered	11807.2	Filtered	907.079	5728.32	5725.48	17035.9	4424.8	3172.62	1958.28	3191.82
P23142	Fibulin-1	FBLN1_HUMAN	13420.2	34914.5	39773.8	37710.4	28720.1	25178.1	29490.2	26714.3	22686.6	23827	14758.7	22706.3	27696.1	27003.9	15846.8	19705.8	39127.1	29664.6	27550	22308	18359.7	20903.8	26772.1	21023.9	Filtered	22432.3	24915.9	29154.9	25494.9	36365.2	16351.1	12557.5	24257.6	17103.4	18795.1	25897.8	11088.2	8956.51	15324.5	74711.8	19422	27766.1	Filtered	20725.8	33773.8	37226.9	39451.7
Q12805	EGF-containing fibulin-like extracellular matrix protein 1	FBLN3_HUMAN	4368.08	Filtered	Filtered	Filtered	Filtered	Filtered	Filtered	Filtered	Filtered	Filtered	Filtered	Filtered	Filtered	6301.14	Filtered	Filtered	Filtered	Filtered	Filtered	Filtered	Filtered	Filtered	Filtered	3271.81	Filtered	7924.01	Filtered	7592.41	9407.64	12778.1	Filtered	Filtered	Filtered	Filtered	Filtered	4712.65	Filtered	Filtered	Filtered	21228.1	Filtered	Filtered	16057.8	Filtered	Filtered	Filtered	Filtered
P35555	Fibrillin-1	FBN1_HUMAN	Filtered	Filtered	Filtered	Filtered	Filtered	Filtered	857.402	2896.87	Filtered	Filtered	Filtered	Filtered	Filtered	Filtered	7008.6	Filtered	Filtered	Filtered	Filtered	Filtered	Filtered	Filtered	Filtered	Filtered	Filtered	Filtered	Filtered	3477.53	872.878	2082.92	Filtered	1012.43	Filtered	Filtered	4064.62	975.733	Filtered	950.671	983.553	9951.99	1250.95	Filtered	Filtered	Filtered	Filtered	Filtered	Filtered
P12318;P31995	Low affinity immunoglobulin gamma Fc region receptor II-a;Low affinity immunoglobulin gamma Fc region receptor II-c	FCG2A_HUMAN;FCG2C_HUMAN	Filtered	Filtered	Filtered	Filtered	Filtered	Filtered	Filtered	Filtered	Filtered	Filtered	Filtered	Filtered	Filtered	Filtered	Filtered	Filtered	Filtered	Filtered	Filtered	Filtered	Filtered	Filtered	Filtered	Filtered	93563.4	Filtered	Filtered	Filtered	46272.1	115222	Filtered	121171	Filtered	Filtered	Filtered	Filtered	Filtered	Filtered	Filtered	Filtered	Filtered	186464	241621	Filtered	Filtered	127324	Filtered
P08637	Low affinity immunoglobulin gamma Fc region receptor III-A	FCG3A_HUMAN	13111.3	15231.5	24040.4	8218.48	17121.2	14507.5	16708.8	12196.2	17867.9	16591.8	8991.51	13159.1	11561.3	14733.8	15611.3	9177.47	12716.9	14853.1	10623.1	12971.8	9647.14	11922	14328.3	11234	18673	23424.1	48626.4	46031.8	24283.6	63239.7	29875.2	25128.9	42125.1	82850.6	17472.6	18902	58340.7	23531.7	41076.9	68447.8	91003.9	56028.4	77305.7	55535.3	25862.5	20445.3	35811
O75015	Low affinity immunoglobulin gamma Fc region receptor III-B	FCG3B_HUMAN	Filtered	Filtered	Filtered	Filtered	625.506	Filtered	Filtered	Filtered	Filtered	Filtered	Filtered	Filtered	Filtered	Filtered	Filtered	Filtered	Filtered	Filtered	Filtered	Filtered	Filtered	Filtered	Filtered	Filtered	Filtered	1955.77	Filtered	1295.87	Filtered	Filtered	Filtered	3806.56	Filtered	Filtered	Filtered	Filtered	Filtered	1646.34	Filtered	Filtered	Filtered	Filtered	Filtered	Filtered	Filtered	Filtered	Filtered
Q9Y6R7	IgGFc-binding protein	FCGBP_HUMAN	19107.6	23729.9	20606.5	18767.4	14471.5	25440.5	19738.6	18840.6	19763.6	16136.9	15242.1	28745.1	35786.8	19853.8	20545.5	24549.4	26957.7	28648.3	14702	24688.8	8569.7	16933.6	20618.6	20418.9	110840	35216.3	43156.5	29102.6	60225.7	48944.1	20730.4	38977.9	31314.3	40610.1	46993.5	20748	40525.5	30750.8	28432.5	149092	65945.4	50396	311322	42731.8	40800.2	23175.2	64848.1
Q15485	Ficolin-2	FCN2_HUMAN	47210.1	54627.8	25636.8	27594.1	29165.4	42007	17086.1	27393.5	49666.7	38052.9	24177.6	52576.9	34957.1	28657.9	64389.5	51380.6	28446.7	65057	19815.7	28808	29442.3	41982.3	44391.2	36575.6	Filtered	70947.7	16487.7	58851	52883	108878	32065.5	44630.3	97415.4	Filtered	64698.8	31020.6	28973	76801.7	21792.3	24061.2	6365.08	66621.9	35716.1	5073.71	11881	21515.2	43698.9
O75636	Ficolin-3	FCN3_HUMAN	660808	301558	527877	340250	59614.6	251078	224976	329805	482584	89375.1	192128	414981	346721	423435	513016	482852	361453	387216	354046	359540	252489	347040	253337	270172	250490	309654	427962	1.27615e+06	1.01468e+06	807304	580109	363486	818930	1.16794e+06	514014	443560	866715	926602	547993	2.25049e+06	592474	1.22363e+06	8471225	376211	503379	464942	809921
P02765	Alpha-2-HS-glycoprotein	FETUA_HUMAN	4.82435e+06	5421105	5205286	3.40597e+06	3222176	3590097	4183692	5.01923e+06	2.47657e+06	6.36585e+06	4.47131e+06	4.39328e+06	3.61745e+06	3.63074e+06	3.65829e+06	3.79469e+06	3.12862e+06	4002990	3.97421e+06	2.7504e+06	3.0773e+06	4.07922e+06	5.27614e+06	3420395	3.40771e+06	5.41711e+06	2.04786e+06	1.06412e+06	1353317	1.77766e+06	1.23964e+06	840027	3.2355e+06	1.84852e+06	1.60579e+06	1.90566e+06	955781	460930	525773	1.50569e+06	1.12611e+06	1.12994e+06	3.23587e+06	1.2439e+06	3444153	4.61082e+06	2.82921e+06
Q9UGM5	Fetuin-B	FETUB_HUMAN	49380.6	68484.6	66592.4	43054	38477.3	84401.5	67450.6	46795.7	31013.8	55663.2	79771.8	71549.9	44040.3	80707	40577	65144.5	31945.2	49582	30476.3	26721.3	31625.3	52997.8	32881.5	53958.6	Filtered	76245.1	59824.8	39921.9	34449.9	57552.8	33429.9	11353.6	27121.2	26163.5	46193.4	37867.8	35717.2	10529.8	24072.3	914362	24075.3	9275.2	Filtered	33996.7	85880.8	62524.4	85789.6
P11362	Fibroblast growth factor receptor 1	FGFR1_HUMAN	Filtered	Filtered	3503.33	Filtered	1804.69	Filtered	3917.06	2700.82	2252.6	Filtered	1923.27	Filtered	Filtered	Filtered	Filtered	Filtered	3047.9	Filtered	Filtered	Filtered	Filtered	Filtered	Filtered	Filtered	Filtered	Filtered	6490.96	11884.8	6601.33	Filtered	8547.79	4142.07	4301.69	11531.6	3998.64	2573.65	Filtered	3376.11	12321.4	Filtered	Filtered	Filtered	Filtered	Filtered	6077.79	Filtered	7401.29
Q03591	Complement factor H-related protein 1	FHR1_HUMAN	97148.4	140569	44497.1	95776.3	135279	65306.2	116152	70778.2	130677	83462.5	117017	100931	89667.1	63220.5	89718.1	113398	55669.7	65857.1	30946.4	57909.8	86278.8	87971.4	112184	78819.1	155133	95887.5	1067048	1.46829e+06	94067.7	2.06048e+06	201452	168617	103587	1.20801e+06	365188	1.70311e+06	654204	1.3685e+06	914638	3.46001e+06	1.39074e+06	1.33493e+06	189864	288814	242055	133389	785209
P36980	Complement factor H-related protein 2	FHR2_HUMAN	18371.5	Filtered	Filtered	5420.18	26833.8	18024.4	14736.5	9061.13	8539.24	Filtered	11036.3	12613	8016.95	5240.97	6480.36	12438.6	15519	13234.8	4409.19	5104.07	15441.1	9099.41	3189.96	Filtered	Filtered	16260.2	Filtered	4029.9	Filtered	Filtered	12986	4075.86	8892.68	Filtered	Filtered	4404.17	2696.52	Filtered	Filtered	33017	1594.4	Filtered	Filtered	Filtered	11210.5	11399.2	Filtered
Q9BXR6	Complement factor H-related protein 5	FHR5_HUMAN	21431.5	23827.6	13251.3	14846.5	11714.1	33441.2	27964.4	15128.6	55679.8	17099.2	30092.6	25204.2	32019.3	16822.5	18044.9	15469.1	26858.8	11337.2	13623.7	13269.4	15568.1	Filtered	6240.74	15307.8	53714.2	9021.93	33233.9	14912.8	18348.1	14794	33056.8	16984.8	20659.4	62779.8	20769.6	19904.7	Filtered	8688.44	323112	Filtered	13674.2	20584.3	Filtered	34453	30609.3	18179.7	33824.6
P02671	Fibrinogen alpha chain	FIBA_HUMAN	55864.3	51864.9	75925.7	30181.5	25738	87206	50154	80357.7	21871.2	19429.1	22001.1	23851.3	73210.6	13598.9	31104.4	18744.1	27910	55859.4	17647.7	49087.3	23054.4	18354.1	17602	18910.5	118804	52459.9	80476.1	116094	90686.4	53987.4	104892	75364.1	33969.7	103734	131774	163181	239500	195582	88710	112336	45279.8	56261.1	121821	60003.5	33675.7	37490.6	64964
P20930	Filaggrin	FILA_HUMAN	2626.39	Filtered	Filtered	Filtered	Filtered	Filtered	Filtered	Filtered	Filtered	Filtered	Filtered	Filtered	Filtered	Filtered	Filtered	3344.03	Filtered	Filtered	Filtered	5629.92	Filtered	Filtered	1756.4	Filtered	Filtered	Filtered	1791.91	Filtered	2321.53	Filtered	Filtered	Filtered	Filtered	Filtered	Filtered	Filtered	Filtered	150723	Filtered	1359.34	Filtered	Filtered	Filtered	15202.8	Filtered	Filtered	Filtered
P02751	Fibronectin	FINC_HUMAN	1.52108e+06	1.75128e+06	1.15903e+06	1.21037e+06	1.01299e+06	597103	828095	846547	499264	1.4729e+06	1.05246e+06	1.25841e+06	1.00262e+06	1.59479e+06	1.21256e+06	1.09807e+06	625240	465320	1.00016e+06	724394	742681	1.17867e+06	999046	1.89876e+06	2.8587e+06	786095	200827	102814	152161	361959	343255	227852	372701	161432	471994	618374	254040	153726	140965	244349	162890	179378	197808	155975	546184	249178	156611
P21333	Filamin-A	FLNA_HUMAN	11309.1	7569.36	15409.9	3571.81	16387.2	Filtered	16562.6	10659.5	17363.7	Filtered	6583.99	16796.1	11649.3	14486.5	18711.6	Filtered	Filtered	Filtered	Filtered	Filtered	Filtered	Filtered	Filtered	Filtered	Filtered	19446.5	4002.45	14395.6	36382.2	22305.1	23961.4	26690.6	6364.38	6614.05	10191.4	28500.8	38409.6	28310	14626	27883	19665.5	11398.1	5511265	15064.1	8719.79	6668.94	12161.9
P41439	Folate receptor gamma	FOLR3_HUMAN	Filtered	Filtered	Filtered	Filtered	Filtered	Filtered	Filtered	Filtered	Filtered	Filtered	Filtered	Filtered	Filtered	Filtered	Filtered	Filtered	Filtered	Filtered	6270.46	12436.8	Filtered	Filtered	Filtered	Filtered	Filtered	8087.26	9826.92	Filtered	Filtered	5549.69	24784.3	Filtered	Filtered	Filtered	Filtered	Filtered	Filtered	Filtered	Filtered	Filtered	10519.9	Filtered	Filtered	Filtered	10725.7	2881.36	Filtered
Q12841	Follistatin-related protein 1	FSTL1_HUMAN	7441.88	5246.82	7736.24	Filtered	6608.9	Filtered	5125.48	2195.29	1908.9	15082.9	1354.2	16930.9	2450.55	7832.15	41840.8	Filtered	5894.97	Filtered	Filtered	Filtered	4688.07	Filtered	Filtered	Filtered	Filtered	3431.67	11664.7	8461.85	7057.57	10062.2	3184.35	7708.74	6463.26	12558.6	4140.82	5354.04	8595.34	6435.2	5324.29	15372	8925.99	9023.38	Filtered	7742.18	11291.2	8705.45	Filtered
P04066	Tissue alpha-L-fucosidase	FUCO_HUMAN	6820.41	4464.71	3860.79	2230.15	1616.96	2710.85	1028.48	3337.97	2465.21	4748.12	2638.93	1286.94	4442.9	3109.83	4076.07	2948.22	5036.56	5308.97	2962.15	3512.11	Filtered	3864.55	1858.06	1349.25	Filtered	3172.47	44013.7	63504.2	59093.9	46495.2	5893.87	11256.4	22836.2	18873.4	7684.34	16925.1	19895.2	13784.3	12460.7	493889	14455.3	29482.1	Filtered	18665.5	12302	4128.69	12332.1
Q9BTY2	Plasma alpha-L-fucosidase	FUCO2_HUMAN	34577.1	46012.3	18694.1	Filtered	1954.8	Filtered	Filtered	15887	Filtered	3752.94	Filtered	9175.71	Filtered	Filtered	Filtered	Filtered	Filtered	14181	Filtered	9125.27	Filtered	1745.69	Filtered	Filtered	Filtered	13275.8	35806.4	18081.8	26012.5	25003.8	38886.6	27245.5	37659.5	28803.2	20068.1	32969.7	34468.2	34277.6	34881	122430	24704.6	31656.7	143453	25311.1	39553.9	26359.2	36052.6
Q9Y2I7	1-phosphatidylinositol 3-phosphate 5-kinase	FYV1_HUMAN	12898.9	10280.4	28095.1	28349.5	35057.2	49399.2	13435.6	18008.6	14049.5	148053	38529.8	28894.5	34101.7	39284.7	13524.5	35839.5	72602.6	235949	65876.2	75039.4	108683	60328.6	97928.1	22829.7	438106	27339.1	44353.7	8290.01	7644.41	106812	21752.2	24808.9	28728.7	80759.6	32423.3	80375.9	73780.5	24212.9	48252.3	220135	49264	91338.9	Filtered	16038	50021.4	35814.4	32718.1
P04406	Glyceraldehyde-3-phosphate dehydrogenase	G3P_HUMAN	Filtered	Filtered	Filtered	Filtered	Filtered	Filtered	Filtered	Filtered	Filtered	Filtered	48584.9	Filtered	Filtered	Filtered	Filtered	Filtered	Filtered	Filtered	Filtered	Filtered	Filtered	Filtered	Filtered	Filtered	Filtered	Filtered	Filtered	Filtered	2469.74	Filtered	Filtered	Filtered	Filtered	Filtered	Filtered	Filtered	Filtered	Filtered	Filtered	Filtered	Filtered	Filtered	Filtered	Filtered	Filtered	Filtered	Filtered
Q9H4G4	Golgi-associated plant pathogenesis-related protein 1	GAPR1_HUMAN	Filtered	Filtered	20898	Filtered	16913.9	17178.6	25514.3	12288.1	13234.3	Filtered	12765.8	13925.6	15711	18752.6	17456.7	16824.2	19021.3	11070.2	10116.2	13031.6	Filtered	14525	14879.4	13525.6	26068.4	12788.3	8811.83	Filtered	Filtered	8367.4	6894.02	Filtered	Filtered	Filtered	Filtered	Filtered	Filtered	Filtered	Filtered	Filtered	Filtered	Filtered	Filtered	Filtered	2074.29	Filtered	Filtered
P06396	Gelsolin	GELS_HUMAN	290500	399609	349593	483879	279953	153496	290710	334438	81736.8	416466	399743	815155	251432	458119	227180	302647	282378	488220	352688	251369	366752	336177	313940	365232	478434	362709	122828	50749.8	136138	114383	95142.7	96554.5	177689	73641.3	261015	238684	90665.1	46026	50353.3	65386.6	30996.4	52697.3	81017	50216.3	139177	270547	172658
Q92820	Gamma-glutamyl hydrolase	GGH_HUMAN	31459.9	14810.5	20117.8	10197.1	27735.7	17313.8	36739.8	16708.2	42567	18944.2	10707.8	17052.9	28056.2	20529.6	18336.1	16799.3	16579.6	11950.5	11697.1	11272.6	18117	12358.7	14073.9	8922.54	32976.6	29248.8	68107.8	108331	64171.8	308022	67794.5	44448.1	88765.3	55546	40274.2	80272.9	64190.1	75132.1	91787.1	115439	55407.1	178549	274287	134437	53235.1	29604.6	157981
P15586	N-acetylglucosamine-6-sulfatase	GNS_HUMAN	Filtered	Filtered	Filtered	Filtered	Filtered	7391.38	Filtered	6819.06	3841.06	Filtered	8081.13	4525.25	7125.97	Filtered	Filtered	6445.94	Filtered	Filtered	Filtered	Filtered	1027.79	1883.02	2153.16	Filtered	Filtered	527.313	1588.71	Filtered	Filtered	Filtered	1159.36	Filtered	2515.46	2696.08	4336.36	2730.01	2661.5	7851.18	Filtered	Filtered	Filtered	1628.21	Filtered	Filtered	Filtered	608.45	Filtered
Q8NBJ4	Golgi membrane protein 1	GOLM1_HUMAN	Filtered	Filtered	7406.95	Filtered	5630.66	Filtered	7660.61	Filtered	10122.6	Filtered	3439.92	6653.3	8600.32	8452.98	3926.97	6271.86	Filtered	Filtered	4961.63	Filtered	Filtered	9375.46	Filtered	4059.07	72499.1	Filtered	6672.02	3131.82	5320.88	4294.18	7590.23	Filtered	1931.4	4047.28	5394.49	9295.94	2453.65	8382.86	9315.88	105488	2102.65	1914.03	Filtered	1803.57	1622.72	1416.21	Filtered
P07359	Platelet glycoprotein Ib alpha chain	GP1BA_HUMAN	107997	154391	192765	78808.3	207000	146792	230130	134574	203770	101441	136461	162777	114933	115168	154225	92936.9	102917	141325	148876	166792	78468.6	108060	194267	49484.7	922638	333623	182426	166674	247092	375532	243079	207258	126628	158915	152549	212560	177062	186456	127716	742285	183620	212617	1.59456e+06	209317	199362	163149	385712
Q14956	Transmembrane glycoprotein NMB	GPNMB_HUMAN	Filtered	12131.9	5872.83	7191.87	Filtered	Filtered	6543.3	5671.69	5770.59	Filtered	Filtered	10325.8	9753.28	14005.2	9084.31	13187.2	13738.4	Filtered	Filtered	Filtered	Filtered	8924.12	10589.1	7486.25	Filtered	21084.3	9018.26	16230.3	9113.55	16635.6	5319.15	9981.24	11597.7	12306.2	8646.04	6982.45	Filtered	8124.38	10784.8	40775.9	5726.7	Filtered	Filtered	11166.5	23238.8	9341.15	Filtered
P22352	Glutathione peroxidase 3	GPX3_HUMAN	89301.8	82177.8	30455.2	53441.9	45666.7	95257.3	53484.6	47291.7	95817.4	60955.7	34689.9	65089.7	43200.8	76783.8	57383	49037.6	85913.1	91778.1	68798.7	79641.4	99841.4	73502.8	72724.5	37774.9	69610.9	73230.1	188440	156459	166860	165206	90883.9	80297.2	92343.3	268343	115694	80913.7	161025	167696	158760	1.61483e+06	152393	115029	Filtered	153699	109808	109575	95858.6
P11021	78 kDa glucose-regulated protein	GRP78_HUMAN	18878	12251.2	13528.8	11097.8	13447	16779.7	13134.8	11652.4	11154.7	10896	15952.8	9189.46	10091.9	13910	12772.4	10274.5	15103.6	16787.1	14584.6	12361.6	16063	13319	10599.5	12704.5	93119	17361.8	22216.6	31938.7	14706.3	34393	17073.6	19105.9	17739.3	16339.1	18265.9	10599.9	18658.1	15258.9	12786	123349	18728.7	17212.3	Filtered	13528.5	24482.8	21225	30411.1
P00390	Glutathione reductase, mitochondrial	GSHR_HUMAN	4160.71	3797.06	6200.59	Filtered	7627.38	Filtered	9569.36	6397.15	6845.98	6365.28	7801.88	11181.7	8960.47	6739.25	7957.84	Filtered	9895.94	6584.47	5291.81	2606.7	Filtered	Filtered	Filtered	3581.75	Filtered	6027.19	5942.7	20464.5	9613.34	8161.25	16912.9	13340.5	15847.6	13230.4	8382.97	16994.2	10863	25294.3	15684	34622.6	17585.1	13112.4	8636.88	19790.3	8701.75	4865.04	5584.47
P0C0S8;P04908;Q93077;P20671;Q96KK5;Q99878;Q6FI13;Q16777;Q7L7L0;Q9BTM1	Histone H2A type 1;Histone H2A type 1-B/E;Histone H2A type 1-C;Histone H2A type 1-D;Histone H2A type 1-H;Histone H2A type 1-J;Histone H2A type 2-A;Histone H2A type 2-C;Histone H2A type 3;Histone H2A.J	H2A1_HUMAN;H2A1B_HUMAN;H2A1C_HUMAN;H2A1D_HUMAN;H2A1H_HUMAN;H2A1J_HUMAN;H2A2A_HUMAN;H2A2C_HUMAN;H2A3_HUMAN;H2AJ_HUMAN	739.555	Filtered	Filtered	Filtered	5364.98	Filtered	7335.62	3413.22	Filtered	Filtered	130129	5300.09	9001.79	Filtered	Filtered	Filtered	Filtered	1476.98	4024.62	Filtered	4598.55	Filtered	Filtered	1024.88	Filtered	Filtered	Filtered	Filtered	18787.8	Filtered	Filtered	Filtered	Filtered	Filtered	Filtered	Filtered	Filtered	Filtered	Filtered	Filtered	Filtered	Filtered	Filtered	Filtered	Filtered	Filtered	Filtered
Q96A08;P33778;P62807;P58876;Q93079;P06899;O60814;Q99880;Q99879;Q99877;P23527;Q16778;Q5QNW6;Q8N257;P57053	Histone H2B type 1-A;Histone H2B type 1-B;Histone H2B type 1-C/E/F/G/I;Histone H2B type 1-D;Histone H2B type 1-H;Histone H2B type 1-J;Histone H2B type 1-K;Histone H2B type 1-L;Histone H2B type 1-M;Histone H2B type 1-N;Histone H2B type 1-O;Histone H2B type 2-E;Histone H2B type 2-F;Histone H2B type 3-B;Histone H2B type F-S	H2B1A_HUMAN;H2B1B_HUMAN;H2B1C_HUMAN;H2B1D_HUMAN;H2B1H_HUMAN;H2B1J_HUMAN;H2B1K_HUMAN;H2B1L_HUMAN;H2B1M_HUMAN;H2B1N_HUMAN;H2B1O_HUMAN;H2B2E_HUMAN;H2B2F_HUMAN;H2B3B_HUMAN;H2BFS_HUMAN	10726.8	Filtered	1645.47	22266.6	4641.25	Filtered	Filtered	Filtered	Filtered	Filtered	280104	6486.05	13845	Filtered	Filtered	Filtered	Filtered	3199.41	Filtered	Filtered	Filtered	Filtered	Filtered	Filtered	Filtered	2953.29	Filtered	Filtered	74009.4	Filtered	Filtered	Filtered	Filtered	Filtered	Filtered	Filtered	2598.09	Filtered	Filtered	Filtered	5319.1	4391.03	Filtered	2520.97	2522.22	Filtered	Filtered
P62805	Histone H4	H4_HUMAN	16229.1	Filtered	641.563	Filtered	2727.13	876.375	1314.91	1001.62	2620.72	856.684	26689.9	3685.49	3060.5	Filtered	1514.08	883.09	Filtered	871.766	Filtered	2382.42	Filtered	209.147	1045.78	632.429	Filtered	Filtered	294.611	Filtered	9856.61	Filtered	Filtered	Filtered	1534.23	Filtered	202.592	Filtered	Filtered	Filtered	Filtered	Filtered	1563.78	Filtered	Filtered	399.815	290.762	Filtered	Filtered
Q14520	Hyaluronan-binding protein 2	HABP2_HUMAN	43316.4	18946.4	17816.9	18624.4	39348.5	20370.3	43990.9	32645.4	22963.6	26500	24206.1	12990	21879.9	4840.2	20797.8	23593.1	16037.6	18438.1	29350	13542.3	22288.8	15535.8	16886	16684.8	57197.4	54183.7	4735.6	15893.1	24510.7	35365.9	6722.41	7143.85	5066.07	5111.92	9450.78	17126.2	Filtered	10405.7	Filtered	16962.5	5991.77	7057.26	25247.2	5983.93	6664.37	7382.4	4954.65
P69905	Hemoglobin subunit alpha	HBA_HUMAN	841616	164255	207753	335051	111444	184668	423515	409728	464424	325076	882088	417451	601992	95028.1	391700	461271	170682	152091	459957	306876	233435	205515	256032	264907	171936	109164	120105	227918	290754	191225	507392	246577	103889	116461	285435	516647	212294	141564	425255	2.73524e+06	555500	4699062	5.83557e+06	661656	201484	180604	836430
P68871	Hemoglobin subunit beta	HBB_HUMAN	947802	155994	229411	395930	115885	197411	429974	378654	509971	324402	913138	364393	622468	137667	441187	410921	204747	89600.1	364520	370414	227078	223534	194292	253105	1.28393e+06	95497.1	132826	297482	371595	271122	672180	305566	112243	147170	217282	444195	251615	150437	376855	1.40518e+06	734036	5552934	4.02592e+06	748437	184725	156183	825372
P02042	Hemoglobin subunit delta	HBD_HUMAN	43524.9	18551.8	16184.8	23984.5	8032.12	24095.5	22982.1	15820.6	25543.8	19438.9	31983	19796.7	50759.7	8782.97	17449.8	18251.9	13321.1	50615.7	12320.9	16979.1	11114.5	15280	11123.1	14004.7	91656.4	34831	16937.2	22540.9	27578.2	10925.7	28766.8	18897.1	15086.2	9321.7	10006.1	27381.8	10658.7	11041.9	25462.2	93032.8	39186	282896	767403	49026.3	18325.2	17263.2	52182.4
Q9ULI3	Protein HEG homolog 1	HEG1_HUMAN	5567.55	5903.75	8323.37	Filtered	Filtered	Filtered	3301.41	7682.79	625.983	Filtered	Filtered	2925.74	3798.73	Filtered	7794.01	1454.82	2872.02	7017.04	Filtered	6967.01	Filtered	7709.59	9426.79	Filtered	11316.5	3761.48	31452.7	2386.98	2262.69	2593.09	4406.19	29927.1	530.443	83261.2	975.398	13225.6	11755.3	8257.71	8199.07	Filtered	4791.5	16222.9	27753.6	8029.14	10879	10558.4	25200
P02790	Hemopexin	HEMO_HUMAN	15437371	12857749	13420310	11817701	12382303	14164787	11680122	11606431	12932289	10128471	9602598	7.80509e+06	11437014	10064296	9605537	10327672	7.0751e+06	9560427	8.31315e+06	8584086	12653236	13090348	10756983	9006626	517884	16951050	17443460	38003976	22724208	28920302	15894708	18930334	18080894	23838674	25132122	9777525	29118142	30432484	34886896	35398416	24201428	45329472	45420456	36801616	19668878	19113896	26602254
P05546	Heparin cofactor 2	HEP2_HUMAN	391003	461475	368696	293151	208582	113358	189602	295139	106815	455162	506913	431013	198252	392794	331833	294311	108641	305713	323493	222254	205350	422385	308101	578044	1.06988e+06	326929	110285	49442.4	112618	142100	115478	82467.1	186290	41586.1	181180	216360	40452.5	45576	34963.8	57854	16677.2	57692.4	154546	66934.3	88197.1	372033	237399
P07686	Beta-hexosaminidase subunit beta	HEXB_HUMAN	Filtered	Filtered	Filtered	Filtered	2091.04	Filtered	Filtered	Filtered	Filtered	Filtered	1790.1	Filtered	Filtered	Filtered	2844.41	Filtered	Filtered	Filtered	Filtered	Filtered	Filtered	Filtered	Filtered	Filtered	Filtered	Filtered	1629.48	4630.3	3548.94	3486.74	2087.2	Filtered	2547.96	7607.58	Filtered	4948.66	Filtered	Filtered	Filtered	Filtered	Filtered	Filtered	Filtered	Filtered	Filtered	Filtered	Filtered
Q04756	Hepatocyte growth factor activator	HGFA_HUMAN	78539.7	37969.8	83282.2	59527.1	71688.5	96141.4	94028.6	90793.3	56182.3	43312.3	41124.7	34072.2	74570.7	64437.2	87940.8	86744.3	76134.8	107994	85795.8	82703.4	87636.1	89492.9	128871	70024.6	328906	89597.4	137734	150804	150422	117105	126659	130418	234924	167900	92482.2	79603.1	144488	136045	25866	228419	84683.5	77997.8	664517	231336	199882	192037	153888
P26927	Hepatocyte growth factor-like protein	HGFL_HUMAN	47040.6	42624.3	30799.6	41298.1	33583.1	39771	30894	34565.5	39777.6	40696.1	29316.1	23123.4	42268.5	14546.2	37340.1	32856.8	36116.2	37301	39509	33086.6	33194.6	39158.2	28359	30177.6	60985.2	54576.6	56251.8	96376.1	66673.4	131014	53549.3	67369	52494.2	94589.6	48586.6	35310.8	79206.8	27878.4	43794.7	282571	78426.7	84996.7	2.73325e+06	103787	67791.5	53921.9	109498
P09429	High mobility group protein B1	HMGB1_HUMAN	Filtered	Filtered	Filtered	Filtered	Filtered	Filtered	Filtered	Filtered	Filtered	Filtered	5031.78	Filtered	Filtered	Filtered	Filtered	Filtered	Filtered	Filtered	Filtered	Filtered	Filtered	Filtered	Filtered	Filtered	Filtered	Filtered	13695.9	Filtered	Filtered	Filtered	Filtered	Filtered	Filtered	Filtered	Filtered	4730.17	Filtered	Filtered	Filtered	Filtered	Filtered	Filtered	Filtered	Filtered	Filtered	Filtered	Filtered
P05204	Non-histone chromosomal protein HMG-17	HMGN2_HUMAN	511.377	Filtered	Filtered	Filtered	418.192	Filtered	1111.88	702.289	Filtered	674.936	3358.6	1091.7	Filtered	Filtered	Filtered	Filtered	Filtered	Filtered	Filtered	Filtered	Filtered	Filtered	Filtered	Filtered	Filtered	Filtered	3385.9	4607.95	Filtered	Filtered	Filtered	Filtered	1254.47	Filtered	Filtered	Filtered	Filtered	Filtered	Filtered	Filtered	Filtered	19463.3	16153.8	1066.06	Filtered	Filtered	20652.1
Q9Y251	Heparanase	HPSE_HUMAN	2840.05	Filtered	Filtered	Filtered	Filtered	Filtered	Filtered	Filtered	4448.47	Filtered	Filtered	Filtered	4543.81	Filtered	2552.66	Filtered	Filtered	2784.49	Filtered	Filtered	Filtered	Filtered	Filtered	Filtered	11175.6	Filtered	Filtered	Filtered	4290.37	Filtered	6174.14	3466.38	Filtered	Filtered	Filtered	6401.47	11770.7	6484.76	Filtered	Filtered	Filtered	7146.81	Filtered	3243.45	4692.94	Filtered	8919.22
P00738	Haptoglobin	HPT_HUMAN	5.3791e+06	1.13121e+06	2.06781e+06	1.89646e+06	464983	5.52435e+06	3.87997e+06	3642132	47887644	1.01643e+06	6.55337e+06	1969403	3.76459e+06	3902495	4.88317e+06	3.96362e+06	1.76889e+06	1.55829e+06	2.9268e+06	8.04672e+06	2.01361e+06	4.5539e+06	3.53526e+06	8022440	32275482	286743	1.61306e+06	3.90366e+06	3.4855e+06	1.05882e+06	7.9592e+06	2574604	1.25689e+06	957644	1.36492e+06	4.1712e+06	1.82854e+06	2.50777e+06	2.48121e+06	4.05735e+06	4.48787e+06	16256415	15663172	5257561	1.32705e+06	2369923	7.19618e+06
P00739	Haptoglobin-related protein	HPTR_HUMAN	12115.4	45918.3	22755.7	11636.5	11752.3	19528.8	35532.8	43136.7	53110.3	25497.2	25028.2	32550	47344.2	24992.3	18096.3	18950.5	14877.2	38999.5	21831.3	20356.1	17586.9	14228.7	31968.1	27490.8	151516	2316.03	11883.7	11550	14824.8	12165.2	20341.1	18839.9	16063	1891.59	17859	51031.1	48026.5	10941.4	13629.4	Filtered	5073.57	7629.03	Filtered	12328.5	12963.2	41493.9	29942.4
P04196	Histidine-rich glycoprotein	HRG_HUMAN	251929	172233	111009	287131	215334	142933	396198	281741	183361	379661	237980	75620.2	269232	162770	146963	345914	169131	122849	155752	297389	373207	361645	211059	192456	110623	300782	79890.6	85628.9	46899.7	107228	68827.9	53455.2	142387	89971.8	37533.7	40500.8	54038.7	93031.8	24544.4	118172	43962.6	85221.4	266539	61657.6	116306	58876.9	93340.2
P11142	Heat shock cognate 71 kDa protein	HSP7C_HUMAN	5068.69	Filtered	2791.07	Filtered	4098.86	916.339	3542.61	2600.09	184.926	12829.4	16560.5	5614.43	4612.17	Filtered	Filtered	Filtered	Filtered	Filtered	Filtered	Filtered	Filtered	2763.25	Filtered	Filtered	Filtered	6873.96	6778.78	5794.03	13976	3589.4	5090.81	5875.36	7423.65	3146.96	4870.28	7652.8	Filtered	2481.69	3483.67	25137.4	Filtered	5698.46	Filtered	Filtered	4662.13	7089.27	11577.2
P01742;P01761;P06326	Ig heavy chain V-I region EU;Ig heavy chain V-I region SIE;Ig heavy chain V-I region Mot	HV101_HUMAN;HV106_HUMAN;HV107_HUMAN	1.36751e+06	4745144	2205000	2.07906e+06	1.80111e+06	3.88949e+06	1.51675e+06	914038	3.57169e+06	695285	4.3051e+06	3.73287e+06	4427174	15247959	5.39416e+06	3.80926e+06	6.26952e+06	5.72152e+06	1.19233e+06	1.85009e+06	1.38532e+06	2893383	3.81938e+06	6.38002e+06	79833056	2446719	2.21791e+06	1.62786e+06	1.54916e+06	925903	3824746	4031909	2.23449e+06	2795689	2.89885e+06	716145	2.74976e+06	1.57735e+06	3461036	12730006	2.96437e+06	1.23966e+06	282856256	1.56877e+06	2.76505e+06	2355603	4.70703e+06
P01743	Ig heavy chain V-I region HG3	HV102_HUMAN	Filtered	26800.2	16397.5	13396.8	4426.5	21594.5	7124.74	8259.21	8919.89	1783.17	14666.4	10413	13695.9	25441.6	20113.5	22573.7	20292.8	20836.1	22118.6	15280.3	3518.8	21735.9	7821.49	29811.6	Filtered	8280.78	4594.11	Filtered	6669.26	Filtered	9157.61	16862.2	14939.3	12193.6	12892.3	9197.58	10842	9304.05	19140.1	Filtered	6564.51	7666.6	Filtered	13106.3	8417.41	15659.9	10497
P23083	Ig heavy chain V-I region V35	HV103_HUMAN	4930.13	77103.7	10456.4	24605.8	10206.4	22452.8	8136.38	3744.9	17847.2	5912.14	24926.3	15142.5	18992.2	32257.3	35597.7	11621.3	37035.3	47798.4	9555.43	7130.27	8588.25	23562.4	20766.3	29424.3	108785	10561	9713.56	Filtered	15995.3	4482.18	10568.4	29929.9	12833.2	16167.8	12249.3	Filtered	13602.9	18661.7	27698.7	Filtered	10527.1	Filtered	Filtered	Filtered	14056	25909.3	Filtered
P06331	Ig heavy chain V-II region ARH-77	HV209_HUMAN	33805.3	106671	91812.6	51394.9	36256.5	50734.5	31045.4	30247.8	48424.7	35764.6	72717.6	48319	50022.2	134724	135356	43920	52171.3	55965.7	29813.9	41328.9	85070.8	72117	45293.9	115816	148004	18062.8	16152.5	46804.7	25962.7	25501.7	40433	23569.8	20880.4	7843.22	33373.9	28694.1	110308	54415.6	85516.5	66187.4	62856.1	24077.4	195942	55964.5	43820.8	32492.4	34941.1
P01763	Ig heavy chain V-III region WEA	HV302_HUMAN	61341.2	423914	247800	181293	139575	302320	25290.2	26708.9	268822	81089.7	269664	55533.1	38520.8	425569	54931.4	274584	247762	207778	75407.9	203344	174106	353040	37334.9	272560	2592447	175390	97079.9	153983	45269.6	156005	152992	217235	120692	117691	24554.6	93239.6	35993.2	19091.9	85807.2	1.13809e+06	51956.6	323516	Filtered	593770	658016	311940	605522
P01764	Ig heavy chain V-III region VH26	HV303_HUMAN	103076	177411	449418	203967	168666	400983	454858	304577	371834	117836	338821	408218	226664	755653	349213	271464	385483	276435	38922	204813	110891	134813	442443	384119	247688	87335.9	166041	91899.1	132897	75610	174932	254108	138823	193606	129111	111061	236412	217555	324184	122692	118594	110238	Filtered	188445	194413	515380	164395
P01766	Ig heavy chain V-III region BRO	HV305_HUMAN	434367	2.60362e+06	1.48328e+06	1.04449e+06	947677	1.84375e+06	1.62707e+06	1.2968e+06	1.41215e+06	675197	1574796	1.62341e+06	1.53263e+06	2170798	1.95171e+06	2113808	1.53068e+06	1.69524e+06	889609	2.17036e+06	1792032	1.76988e+06	1.61088e+06	2.33882e+06	15732725	1.57247e+06	870038	1.37883e+06	1.03627e+06	1.55617e+06	1.34203e+06	1.9307e+06	1.40841e+06	1.46126e+06	1.49738e+06	959668	2286115	1.52511e+06	2.98685e+06	5.6585e+06	1.30785e+06	1.29179e+06	5.46539e+06	1.2836e+06	1.45293e+06	1648512	2111902
P01767	Ig heavy chain V-III region BUT	HV306_HUMAN	53574.9	80877.6	36187.4	102554	66111.4	42868.6	121136	18111.6	95399.2	54158.2	109659	18527.3	644207	83631.6	174376	324734	232441	55510.1	72210.8	145929	101760	182964	33024.4	60227.1	749722	39239.9	148682	126858	130365	132646	64588.1	209583	86783.6	100816	94672.4	85817.4	41810.5	51861.9	172805	Filtered	161396	87159.2	Filtered	39033.4	75996.9	108785	94029.9
P01770	Ig heavy chain V-III region NIE	HV309_HUMAN	25746.5	212062	120519	62437.5	53807.4	107556	112339	118539	117345	27993.5	84281.3	111549	76764	228572	107919	90564.1	116939	76261.7	39096.9	62272.3	43427.9	89070.3	91349.6	90764.4	149136	79618.3	48374.7	81949.8	35440	47567.8	35210.6	68274.7	31307	79450	40660.1	47552.5	94432.5	75687.8	72367.4	104976	64286.1	50402.2	Filtered	66782.7	67837	96325	42326.7
P01772	Ig heavy chain V-III region KOL	HV311_HUMAN	942329	18770240	7.27135e+06	3.78449e+06	3.35026e+06	8552188	6701603	3.57389e+06	7.23679e+06	2.45267e+06	5435787	5.60501e+06	7.08797e+06	16675905	4.19876e+06	3034354	6109379	10942608	4.4992e+06	5058031	7.14636e+06	8.08429e+06	7895572	5.40086e+06	221641008	4748123	6642325	10223804	2.82897e+06	5.56246e+06	3599394	4.77172e+06	2.8316e+06	10397144	4.62681e+06	2.7432e+06	8454106	9221633	9891742	155359440	9540744	3.04241e+06	462126944	6946841	5548419	3138206	7.01449e+06
P01776	Ig heavy chain V-III region WAS	HV315_HUMAN	61679.5	958173	332141	245898	162586	363908	325648	337145	253917	95672.1	277546	137911	302185	718236	397115	159000	496222	253686	135724	206490	265875	403224	303632	302641	1.12599e+06	192204	220864	147654	90736.4	328417	194490	421630	150122	205488	167650	197393	593883	202056	647468	27831.6	329761	157461	Filtered	188247	254330	573764	222850
P01778	Ig heavy chain V-III region ZAP	HV317_HUMAN	6025.14	12691.5	15311.8	11758.5	17093.3	24258	12602	23827.8	8839.42	6477.8	18904.9	43002.1	47677	51009	19362.2	17334.5	39745.7	21313.8	Filtered	10372.2	Filtered	17552.4	24565.3	36755.9	268085	5679.33	48855.6	Filtered	10875.3	17584.9	26158.8	42095	13692.8	21514	13683.8	10627.1	20282.9	7394.49	21092.4	Filtered	28574.8	Filtered	Filtered	5798.2	11414.8	16576.8	9821.54
P01780	Ig heavy chain V-III region JON	HV319_HUMAN	12093.6	157823	20215.5	37203.9	27207.3	62595.4	44981	34048.1	38281.3	10412.8	42158.3	37980.4	58373.9	42265.6	66658.1	80224	24328.8	53959	25506.1	37878.4	42772.7	89958.3	53135.8	26560.8	1.11162e+06	26974.3	7166.99	27423.5	20114.2	22730.8	46735.9	62356.9	34244.6	31175.3	33903.9	30427.8	48910.4	37142.3	79112.3	71699.1	34713.3	20890.8	Filtered	39818.2	47829.7	13818.9	34983.5
P01781	Ig heavy chain V-III region GAL	HV320_HUMAN	91784	405637	252343	269804	128979	203037	310984	226807	248904	116735	280721	368252	150462	359646	158734	210320	196000	176332	208846	154766	209435	246561	230267	215888	242258	134326	110869	93443.7	77710.4	65733.2	157165	188798	107272	108968	116770	74186.4	273198	172950	262704	24440.4	181496	98834.1	Filtered	159558	151935	207319	298006
P80419	Ig heavy chain V-III region GAR	HV322_HUMAN	Filtered	153186	84909.2	54331.5	39148.4	105037	58175	54007.5	57213.3	24265.6	67217.9	56953.5	80701.3	133164	66312.8	72623.1	101560	83849.6	29877.8	48834.9	38715.7	164524	55849.7	141718	933911	27867.9	32020.7	Filtered	17175.5	Filtered	65401.1	118207	28576.8	49716.2	66821.9	37073.8	65560.4	41593.9	115433	Filtered	46838.3	Filtered	Filtered	25297.9	56868.2	77768.3	38747.8
Q9Y4L1	Hypoxia up-regulated protein 1	HYOU1_HUMAN	13710.5	14171.6	14312.9	10804.6	9050.52	8467.42	12056.5	11482.7	4175.7	12116	12707.9	15107.6	18289.7	9597.18	9887.58	8640.41	7540.11	Filtered	9081.78	10892.8	7631.8	Filtered	14533.7	9026.27	Filtered	16026.1	Filtered	Filtered	2126.64	Filtered	1304.33	Filtered	Filtered	Filtered	13529.9	13409.6	Filtered	Filtered	Filtered	8519.5	Filtered	Filtered	Filtered	Filtered	8663.71	9943.68	8333.53
P08833	Insulin-like growth factor-binding protein 1	IBP1_HUMAN	Filtered	Filtered	Filtered	Filtered	Filtered	Filtered	4891.5	Filtered	7917	Filtered	Filtered	Filtered	5946.09	5651.6	3715.2	Filtered	Filtered	5501.85	Filtered	3780.1	Filtered	Filtered	Filtered	Filtered	Filtered	4005.81	Filtered	Filtered	7769.18	Filtered	674.702	Filtered	Filtered	Filtered	Filtered	Filtered	Filtered	Filtered	Filtered	Filtered	Filtered	Filtered	Filtered	9561.15	4550	6520.44	Filtered
P18065	Insulin-like growth factor-binding protein 2	IBP2_HUMAN	30280.9	14944.1	22360	42248.8	22888.6	41950.6	39964.7	19214.7	40525.2	13168.6	30280.7	19753	47703.6	48706.1	27611.9	5783.5	34299.5	18580.6	18463.8	35380.9	18030.3	75881.9	Filtered	Filtered	60660.6	29543	21876.5	14878.9	24933.2	22626.1	45799.1	15184.6	37256.9	20432.7	15428.7	21909.5	17580.6	Filtered	29252.1	122975	36433	57909.4	66658.6	111801	76598.5	79448.2	67870.9
P17936	Insulin-like growth factor-binding protein 3	IBP3_HUMAN	184978	252115	131081	99856.8	137045	155990	141025	122862	118039	110003	117908	162153	104459	76055.3	125439	116547	95500.4	144720	133738	121724	89705.6	48377.9	184222	115241	89484.7	154299	391755	489476	436163	612298	248074	352940	231266	568426	286162	530778	594070	393191	138411	623575	335476	516784	3.20075e+06	289525	308152	386423	496754
P22692	Insulin-like growth factor-binding protein 4	IBP4_HUMAN	92609.9	77424.5	67147.9	36174.2	66953.3	59403.8	70126.9	72443.9	76683.4	68323.2	47504.1	40690	56646.3	44761.2	62871.6	62420.7	59183.5	41610.7	53601	64384.1	50311.6	61420.6	84897.3	59273.1	132986	70913.5	128807	110694	60731.9	Filtered	87618	92632.7	67497.4	169410	103482	117429	116112	99952.8	118327	323042	121161	182659	322342	133232	155991	128396	109701
P24593	Insulin-like growth factor-binding protein 5	IBP5_HUMAN	21998.5	29798.8	21816.5	1042.52	15595.3	32025.5	25356.3	18083.3	17566	34737.2	11788.8	24790.3	37581.9	27239.8	22444.8	24736.2	21336.2	25485.7	29386.9	39079.4	62267.1	48950	40088.7	15937.1	71650.1	59524.5	101309	60827.2	31618.1	61568.2	52290.6	39050.2	64839.3	87071.2	186271	59429.5	62046	43437.9	44926.4	115159	93365.1	45544.3	86387.7	70367.1	104421	158406	127605
P24592	Insulin-like growth factor-binding protein 6	IBP6_HUMAN	15332.5	Filtered	11677	8251.54	11055.2	2421.48	13873.8	Filtered	Filtered	Filtered	4222.49	8405.73	11937.5	6072.93	Filtered	8249.69	Filtered	21870.1	16606.6	7242.76	14783	Filtered	5178.51	7519.97	Filtered	33481.5	16614.7	58698.2	26001.1	47651.4	16610.4	25892.1	10655.6	Filtered	12323.6	25611.5	16574.8	13153.3	14960.8	103815	13456.7	10004.3	68302.2	20333.8	9794.54	Filtered	10224.3
Q16270	Insulin-like growth factor-binding protein 7	IBP7_HUMAN	30728.4	9881	17471.9	10393.4	12064.6	21700	10732.2	13591.9	13138.8	16654.9	9795.23	17462.3	15622.8	22282.3	11971.5	9944.66	23021.4	14704.7	10868.1	18174.5	14228.5	13177	9211.05	10438.4	Filtered	26697	35275	27779.1	27662.3	33483.5	24207.4	19770.6	15575.4	26877.4	24473.2	27676.7	42057.1	28881.8	58760.8	26932.4	42570.5	31902.1	28337.7	62284.8	41370.9	25481	50673.2
P05155	Plasma protease C1 inhibitor	IC1_HUMAN	2900999	520016	1870496	1.24276e+06	2.09056e+06	1.65853e+06	1.914e+06	1.23426e+06	2.01229e+06	319985	576574	544107	1.97832e+06	1.66674e+06	2.02458e+06	1.3746e+06	1.58405e+06	1.8459e+06	1.65238e+06	1.87429e+06	2.32336e+06	2256318	1.70826e+06	1.38314e+06	5725704	4.57835e+06	3.21097e+06	3.4715e+06	5450387	8.01079e+06	4.60917e+06	4783150	2.79632e+06	1.08497e+06	3.73101e+06	2.96209e+06	2506221	4543664	1.82962e+06	34165320	3.22077e+06	832767	6465334	3.80575e+06	4786061	5574712	2831814
P05362	Intercellular adhesion molecule 1	ICAM1_HUMAN	11263.6	11192.8	6215.6	9637.46	6239.78	9373.74	8604.18	8134.57	7895.47	12650	4936.8	5383.61	7170.29	6835.54	3641.3	8996.2	9723.93	7806.5	7913.14	7156.91	Filtered	8421.03	6741.78	7611.39	Filtered	19764.4	31587.5	24794.1	21421.2	22243.9	23901	18868.5	29716.7	35529.1	18953.1	13771.8	17114.8	20086.8	26074.5	Filtered	20933.8	20859.9	Filtered	35413.6	36574.6	17240	21298.1
P13598	Intercellular adhesion molecule 2	ICAM2_HUMAN	25191.5	17180.7	21846.4	11719	17371.8	6246.93	23935.2	19896.2	17870.2	11783.6	9290.19	15451.6	15140.9	10599.7	13598.7	12128.8	16892.9	16591.2	18123.3	22185.6	24304.1	17906.4	19192.8	14930.2	Filtered	25353.1	48597.6	108070	29833.4	101576	38327.2	47195.6	32697.4	85689.3	46232.9	27055.6	56456.9	58128.9	56398	120058	57148.7	54865.7	Filtered	98812.7	47816.2	43270	71872.7
P32942	Intercellular adhesion molecule 3	ICAM3_HUMAN	11853.6	15599.2	19130.2	8121.27	9565.09	24265.9	9127.18	9432.16	11596.8	14185	5601.39	8403.61	7571.41	17559.7	14757.2	10315.4	19941	13381.9	19704.2	9786.35	9464.62	Filtered	10186.6	14532.4	Filtered	21678.8	31445.2	33719.2	9864.34	30693	8613.48	57762	5361.69	22611.3	10047.1	17674.2	27070.8	21633.2	34790	422039	34087.1	44821.9	58625.4	71607.1	33004.4	19392.6	73222.9
P05019	Insulin-like growth factor I	IGF1_HUMAN	Filtered	Filtered	Filtered	Filtered	Filtered	Filtered	Filtered	Filtered	Filtered	Filtered	Filtered	Filtered	Filtered	Filtered	Filtered	Filtered	Filtered	Filtered	Filtered	Filtered	Filtered	Filtered	Filtered	Filtered	Filtered	Filtered	3708.17	19825.3	10483.4	21933.2	Filtered	1637.82	Filtered	3726.66	2728.46	11310.7	2202.45	3794.56	Filtered	19501.8	Filtered	1912.01	Filtered	Filtered	Filtered	1440.26	Filtered
P01344	Insulin-like growth factor II	IGF2_HUMAN	Filtered	Filtered	Filtered	Filtered	Filtered	Filtered	Filtered	Filtered	Filtered	Filtered	Filtered	Filtered	Filtered	Filtered	Filtered	Filtered	Filtered	Filtered	Filtered	Filtered	Filtered	Filtered	Filtered	Filtered	Filtered	1647.53	Filtered	29674.4	7110.48	51186.9	Filtered	Filtered	Filtered	Filtered	Filtered	Filtered	Filtered	Filtered	Filtered	1.1062e+06	Filtered	Filtered	Filtered	Filtered	Filtered	Filtered	Filtered
P01876	Ig alpha-1 chain C region	IGHA1_HUMAN	2.233e+06	5010893	40118844	11301121	7008898	8.37436e+06	11530155	3.18266e+06	6.54148e+06	4.26432e+06	34130468	27293944	20001140	37039120	12758193	15409112	22768696	9690192	10362107	2.10026e+06	5.90691e+06	15924303	3.35936e+06	14085240	43509512	7.35189e+06	8994728	1.43056e+06	2.6193e+06	2.8513e+06	10260487	14629464	3.60893e+06	7092026	9777155	3.06847e+06	8041646	8858517	18583736	6266199	26353306	5530544	14883718	3.3017e+06	7076275	8647209	9056840
P01877	Ig alpha-2 chain C region	IGHA2_HUMAN	578131	1.26798e+06	10122954	2.51273e+06	1564224	1.7532e+06	2.62954e+06	772603	1.58143e+06	1314299	7.18132e+06	7.28238e+06	5.4192e+06	6.64138e+06	2997834	3.3754e+06	5.07691e+06	1916306	2.94884e+06	520177	871312	2691977	775284	3.0151e+06	5.81779e+06	1.14012e+06	1491816	346437	520983	606755	1.52861e+06	3.95238e+06	719442	1.26274e+06	1.99862e+06	864306	1.74514e+06	2.3859e+06	6321801	677088	6.03322e+06	1.29919e+06	3.72219e+06	660667	2063473	2.61134e+06	1.43805e+06
P01880	Ig delta chain C region	IGHD_HUMAN	Filtered	Filtered	Filtered	29701.7	1211.06	45084.4	3763.08	3768.22	900.61	12149.9	6425.75	82417.7	Filtered	192747	52797.2	16663.7	6540.32	Filtered	25601.9	5906.92	Filtered	27664.8	22712.7	5850.59	Filtered	Filtered	24867.1	6377.67	12245.3	192590	18786.1	179775	3325.8	Filtered	87845.2	146275	10670.1	38031.8	82514.7	7.7936e+06	62574.8	2074	Filtered	8507.59	14348.7	82994.8	Filtered
P01857	Ig gamma-1 chain C region	IGHG1_HUMAN	628731	5128838	1.24427e+06	1.13207e+06	822608	1.42294e+06	1.07458e+06	812443	867025	531712	1.00203e+06	954535	884452	6.50343e+06	1.99706e+06	1.25605e+06	2350948	2.27163e+06	1.2547e+06	1.22269e+06	1.00699e+06	2.42946e+06	2.16054e+06	2696702	146020608	595116	656990	274746	314682	180385	2179797	1.42798e+06	889114	1.6606e+06	1.6728e+06	438018	1.26532e+06	1.39682e+06	3.48131e+06	41715688	1.38212e+06	240460	539865984	866975	607884	533071	445650
P01859	Ig gamma-2 chain C region	IGHG2_HUMAN	2.53723e+06	19254428	7886439	10429254	8.03023e+06	11871275	15585173	11321435	21659390	2.58059e+06	11546882	13941799	23494252	20663370	23056516	11080008	7328644	16443107	2337050	12630867	9148295	24439364	17249164	24740132	92105248	7.04416e+06	8551275	4.74748e+06	6617002	1.38552e+06	18019186	16334273	6153039	10742993	8778226	4987967	29686438	39501732	70597936	16167337	30141694	12956418	24510948	11172765	24390586	20909542	25464090
P01860	Ig gamma-3 chain C region	IGHG3_HUMAN	8907283	52160908	17039692	16309765	14366928	16239312	20253660	14498313	22519076	6.55159e+06	17611814	18400662	26985132	49817228	37229492	12526916	24476748	22602842	9295186	15177752	15088140	37902588	34882268	36620468	130750072	9841396	15046649	8962165	8061412	6021648	32401000	21890416	12391679	26122390	24229618	8959788	37791632	41869780	101934856	22748494	44256884	12102563	40950760	20524782	26738028	19278216	21933902
P01861	Ig gamma-4 chain C region	IGHG4_HUMAN	285770	1480058	72561.4	190105	443882	1.20302e+06	441895	175747	869658	180138	1.34001e+06	516729	3.28221e+06	612972	1868269	1.16906e+06	441947	605432	104634	411836	1.08122e+06	820092	398347	3573401	13834506	125657	1.44935e+06	188151	330845	234464	1.85185e+06	2.00431e+06	70174.1	871088	1.37115e+06	1174706	162084	1.03118e+06	2.88809e+06	1.95259e+06	2.28767e+06	1.44346e+06	28082938	949263	1.66293e+06	118335	3.02394e+06
P01871	Ig mu chain C region	IGHM_HUMAN	1.71189e+06	14431152	3.02469e+06	1362880	4375110	6.74915e+06	5642616	11014150	8023032	2.49696e+06	4573302	6868574	3.65305e+06	3.98384e+06	2.57099e+06	4203292	13128933	8852109	1.30829e+06	968681	6.02344e+06	2.2961e+06	8865864	994606	10722669	5.23942e+06	3.40647e+06	5.86744e+06	2746647	5.69818e+06	3.73337e+06	18542660	1986139	3.96685e+06	1.85211e+06	8.08901e+06	36124856	8638483	4249426	7784729	4.97705e+06	7186193	30568432	14586161	6808371	15955266	7436982
P01591	Immunoglobulin J chain	IGJ_HUMAN	211195	1064396	912395	242081	381107	759004	532773	631032	634556	353896	539461	678817	518136	986590	412966	434756	834115	538240	222446	185502	494671	622219	594641	416388	3.13969e+06	133066	575658	420171	164562	453113	280863	1.23677e+06	261515	587268	82716.2	158167	749416	229244	212892	293256	294954	701622	2295763	957924	893609	1.05673e+06	728728
P01834	Ig kappa chain C region	IGKC_HUMAN	1.46569e+06	8534352	4371104	2.76598e+06	2.1784e+06	4404870	4210790	3217861	4027765	1.36438e+06	4.04565e+06	3872070	3.41497e+06	10368244	6833738	3.48053e+06	6.65827e+06	6781678	2.57168e+06	4.44135e+06	2663089	6.57171e+06	4.87389e+06	7317163	7.64821e+06	3.12305e+06	2.83745e+06	1.98561e+06	1.82684e+06	2.03278e+06	4874138	5.28103e+06	2.64792e+06	3.30844e+06	3.96167e+06	2.57015e+06	6.27488e+06	2.97891e+06	7762875	6.50856e+06	4.52744e+06	1953109	15763787	3.0966e+06	4.37663e+06	4765026	3.72837e+06
P15814	Immunoglobulin lambda-like polypeptide 1	IGLL1_HUMAN	1.41647e+06	6611826	5.23155e+06	3.50054e+06	3.22019e+06	4.21024e+06	495104	3.26742e+06	4831370	1.98875e+06	5679146	6.53332e+06	4.76942e+06	16219913	3.68117e+06	4818934	6.28293e+06	4836822	2.48922e+06	2.93311e+06	3.79987e+06	6469795	5.46246e+06	5397503	29790600	1.37327e+06	6399286	1.29688e+06	2.36313e+06	4.70312e+06	3.91916e+06	6502840	2.05125e+06	10075744	2.31131e+06	1.69219e+06	4.56228e+06	2.87712e+06	4.53114e+06	196801408	2.72375e+06	1.06661e+06	Filtered	3.58266e+06	2.94557e+06	1.8831e+06	2880561
B9A064	Immunoglobulin lambda-like polypeptide 5	IGLL5_HUMAN	409977	3.92494e+06	3.3461e+06	1.51752e+06	1.6003e+06	2009861	1.88861e+06	1.68181e+06	2789217	925298	3016639	4.31663e+06	2.89211e+06	8202961	2.54205e+06	2123843	2993364	2.27272e+06	1.24867e+06	1.18444e+06	1.44189e+06	3.0165e+06	2588302	2.79239e+06	15980084	920830	2.5176e+06	1366453	931660	1.82761e+06	3877158	5.44673e+06	1.93967e+06	4.5996e+06	1.55648e+06	1.38434e+06	3.32946e+06	2505385	3.167e+06	100351264	1.99112e+06	1.13878e+06	2.44053e+06	1.76595e+06	2946164	2.38137e+06	2.69058e+06
Q9NPH3	Interleukin-1 receptor accessory protein	IL1AP_HUMAN	19541.4	14551.3	15473	17973.9	10984.4	25759.5	11793.4	8860.97	14779.1	13206.9	10586.1	11913.2	13283.3	21664.2	13612.9	13150.1	15185.7	19925.9	14486	15608.9	11282.8	19230.9	16829.7	8545.54	Filtered	31390.9	37045.1	50082.9	23408	74072.1	12295	13126.1	19691.7	30124.8	18701.6	5212	Filtered	5783.68	Filtered	566725	Filtered	Filtered	Filtered	Filtered	Filtered	10775.9	Filtered
P40189	Interleukin-6 receptor subunit beta	IL6RB_HUMAN	5031.15	2974.11	3822.53	4133.55	3475.51	Filtered	7229.57	3963.38	4150.72	9080.59	3998.03	7136.13	5668.08	4857.04	3985.26	7227.13	4100.1	5077.84	6104.36	6730.11	11162.9	5045.7	4153.39	4467.07	Filtered	7380.04	8007.03	8188.12	7009.41	7152.96	6583.92	7789.53	9310.25	10357.8	8846.65	4392.77	4701.27	24311.8	6818.61	Filtered	8987.7	5544.76	Filtered	8474.48	16041.1	19809.5	7862.42
P05154	Plasma serine protease inhibitor	IPSP_HUMAN	16280.3	Filtered	16696	6638.58	17022	11953.6	35758.8	25168.9	15708.6	10413.8	Filtered	697.09	25108.2	940.091	21701.5	39028.6	19043.5	49205.7	25026.2	45134.1	34752.7	28973.9	29403.9	30510.9	Filtered	9503.39	47475.7	8691.77	21174.1	Filtered	6501.02	10385.5	36066	Filtered	32959	705.383	30430.8	20416.4	Filtered	54028	Filtered	Filtered	Filtered	16044.1	75428	27750	11830.1
iRT-Kit_WR_fusion	NaN	iRT-Kit_WR_fusion	17087696	24851154	12267235	20855994	11032700	27521010	10840582	11991824	14875415	26368840	10603565	10986094	18285248	16433832	16953842	11856070	21503358	31466558	17395736	19008406	37059332	25658028	21891544	16674762	128035272	25054590	34717316	50968764	25501162	53527936	20555844	21498050	17337606	24968504	23226302	19518104	34294456	20971780	35406644	776748096	43166536	38092112	1838916736	46237440	41410336	28115992	51661848
Q9NQ38	Serine protease inhibitor Kazal-type 5	ISK5_HUMAN	3323.18	Filtered	1462.58	Filtered	Filtered	Filtered	Filtered	3127.5	Filtered	Filtered	Filtered	1301.18	996.893	Filtered	Filtered	2139.83	2830.34	Filtered	Filtered	2227.68	Filtered	Filtered	Filtered	Filtered	Filtered	1579.76	7684.02	10382.8	6371.67	4331.66	5046.14	4658.34	1929.31	10350.6	3598.24	6251.09	6703.91	4647.01	4918.69	Filtered	6885.54	720.397	Filtered	8658.19	7789.61	1483.29	7551.12
P05556	Integrin beta-1	ITB1_HUMAN	4955.09	5820.99	5837.61	Filtered	2942.52	6700.79	7200.84	5728.71	4334.8	4128.71	5985.14	5047.52	6128.65	7404.33	4456.48	3285.28	8156.02	7360.39	3735.26	5112.09	Filtered	6706.97	7005.61	4777.54	16244.1	8479.16	8319.92	12818.5	7524.91	14101.2	8238.54	20575	7731	7597.02	6972.29	10247.5	8835.09	731.129	14950.1	Filtered	14291.1	9126.5	Filtered	35080	17788.3	13805.3	25255.2
P19827	Inter-alpha-trypsin inhibitor heavy chain H1	ITIH1_HUMAN	977012	1.01992e+06	561837	926517	521659	332988	347366	526014	244661	920270	714497	887308	504785	689150	450199	627284	261031	665645	577972	333016	376864	417438	438747	703439	1.32654e+06	662684	1.06218e+06	348889	582875	1.11644e+06	871467	522389	844793	273507	522429	649484	491729	342144	237764	1.32018e+06	417150	583159	1.60308e+06	563337	1.54252e+06	1.64277e+06	1.4597e+06
P19823	Inter-alpha-trypsin inhibitor heavy chain H2	ITIH2_HUMAN	1.91152e+06	2.34641e+06	1.44802e+06	2316379	1.30031e+06	683005	947085	1.60624e+06	493844	2.52497e+06	2.01392e+06	1.85191e+06	1201965	1.6263e+06	1.38452e+06	1.59015e+06	659398	1.27921e+06	1244901	828709	939490	1.40015e+06	1.14516e+06	1.67082e+06	4.19516e+06	1.67199e+06	2570693	1.25578e+06	1.78452e+06	3.10776e+06	1.45782e+06	1297796	2.67339e+06	812315	1.64173e+06	1.7304e+06	1.29258e+06	811425	601304	2.17129e+06	944642	1.35889e+06	1.81073e+06	1.80732e+06	2870696	4.08961e+06	3.11885e+06
Q06033	Inter-alpha-trypsin inhibitor heavy chain H3	ITIH3_HUMAN	87384.7	79084.4	51245.6	137522	45553.7	59938.9	27216.4	40086.9	50727	64452.1	69875.7	54246.1	48634.5	81315	70573	38713.9	63140.3	45717.7	56625.2	56187.9	51284.2	45869.4	56831.7	41602.9	108655	56133.7	66982.4	47069	70595.2	62547.9	58183	63187.1	86381	15592.3	34335.5	47019.3	42913.1	23207.8	21512.9	115167	45281.2	68289.7	Filtered	165464	139656	129636	176296
Q14624	Inter-alpha-trypsin inhibitor heavy chain H4	ITIH4_HUMAN	1.30636e+06	1.40316e+06	916430	506607	838761	608831	591842	1.0379e+06	569385	954516	1.29345e+06	910030	908158	1.1173e+06	1.49045e+06	1.0791e+06	506818	991915	794817	871166	633329	987921	1.13389e+06	1.07839e+06	4.00737e+06	667144	1481104	319897	646992	336929	756543	746694	1.02598e+06	164318	753524	465743	673104	539435	93542.6	1.21538e+06	463906	386894	513703	1.09234e+06	1.71185e+06	2056730	554315
P13645	Keratin, type I cytoskeletal 10	K1C10_HUMAN	17087.3	16621.1	32535.9	25385.8	50271.5	143683	14599.2	44606.1	32180.2	445422	20958.7	44328.4	29785.2	31765.1	26542.7	46705.6	11731	37940.4	56353.7	252619	32356	52832.2	22107.1	21317.1	153113	34455	25991	35488.8	229833	116676	33138.7	40125	80309.4	113041	303845	17666.1	85491.1	90885.5	61933.9	24440.6	92278	26425.9	129688	660117	56336.7	21961.1	37228.3
P02533	Keratin, type I cytoskeletal 14	K1C14_HUMAN	9107.15	8736.99	12883.7	6924.28	14503.6	127589	9686.77	24490.8	9791.23	40143.1	3937.66	20781.6	13217.1	58448.3	8931.19	12089.2	4352.83	17077.6	12788.9	139491	22584.1	47920.6	10393	7710.95	49657.4	9513.37	7062.46	11905.8	13417.8	2727.56	19322	20356.7	55698.5	60195.9	24944.8	5783.06	26102	18476.7	16392.5	24578.3	12911.5	Filtered	89265.1	40555.6	16227.2	Filtered	Filtered
P08779	Keratin, type I cytoskeletal 16	K1C16_HUMAN	23449.3	15547.5	24623.1	15133.5	26623.5	140273	17519.4	30956	19510	1.18822e+06	11323.5	69195.8	14944.4	63880.1	49003.9	135654	17884.1	19313.5	143247	314952	16992.8	37256.2	14560.6	8835.44	391456	6077.65	8047.31	15704.9	34425.7	23805.1	10733.7	21937.3	97201.5	123178	36981	20460.8	15941.9	57717.9	18813.2	10506.2	31500.7	37295.2	798609	212517	24286.2	9993.21	41994.8
P35527	Keratin, type I cytoskeletal 9	K1C9_HUMAN	52383	51591	46203.3	28027	60451.8	711577	21701.2	49737.4	26394.4	49749.4	8733.97	71911.4	12481.2	77373.8	36882	92943.3	15065.4	70572.3	27861.5	541395	68256.2	158180	36100.6	20425.7	217885	40996.6	44715.6	67911.7	9076.31	85913.9	56490.1	107367	164776	325129	100337	13567.4	54630.6	113120	98044.4	621476	232891	49179.4	4662660	72919.9	138006	16491	36337.2
P35908	Keratin, type II cytoskeletal 2 epidermal	K22E_HUMAN	100813	72863.5	65366.2	58617.2	112839	137866	27266.1	152030	67231.9	618981	41879.3	136985	52211.2	103305	63288	183186	22234.3	95521.7	314811	301760	130410	128796	52638.6	42297.1	262983	98095.7	60143.8	72066	52190.6	176689	61044.5	88277	293187	195962	1.00721e+06	29333.2	234126	497002	258049	139949	239290	99223.1	604918	317758	132993	99769.6	63263.3
P04264	Keratin, type II cytoskeletal 1	K2C1_HUMAN	84723.5	65725.5	92796	62975	83633	957176	56763.8	84333.2	63659.7	776570	30216.6	122509	52799.2	146218	83174.7	124021	36141	102082	96420.1	1.01047e+06	122137	191088	73968.9	74223.8	209766	82712.9	85948.2	72586.1	229397	76095.5	146811	112138	268678	176281	560890	40267.6	295509	390111	173108	210409	271334	94564.2	1.74978e+06	1.09049e+06	215358	31115.4	60567.8
Q7Z794	Keratin, type II cytoskeletal 1b	K2C1B_HUMAN	Filtered	Filtered	2148.67	Filtered	1348.87	Filtered	Filtered	Filtered	Filtered	50150.3	Filtered	Filtered	Filtered	Filtered	Filtered	2337.34	Filtered	Filtered	2920.5	Filtered	Filtered	5001.18	Filtered	Filtered	Filtered	Filtered	Filtered	Filtered	Filtered	13882.2	Filtered	Filtered	Filtered	Filtered	15335.2	Filtered	Filtered	21033.8	Filtered	Filtered	Filtered	Filtered	Filtered	261533	Filtered	Filtered	Filtered
P13647	Keratin, type II cytoskeletal 5	K2C5_HUMAN	13480.9	18443.5	16426.8	10435.8	21742.8	141845	17434.4	14561.8	16976.8	43611.5	8893.33	21343.3	15623.4	26050.3	12316.7	28966.8	3152.21	14815.8	18091.1	110969	21480.8	33684.2	11528.7	14640.6	104332	12778.9	10986	5767.53	78583.4	10919.5	24582.2	16601.5	25481	71366.4	80109.4	13318.3	47896.1	34791.1	26691.3	Filtered	21976	7293.24	Filtered	72324.2	26518	32623.8	Filtered
P02538	Keratin, type II cytoskeletal 6A	K2C6A_HUMAN	15014.9	918.939	11592.5	2982.09	9296.06	104487	1499.64	7289.44	5097.03	64819.9	1225.03	20986.3	9656.14	32074.3	8898.26	6557.2	13201.9	8274.86	8182.56	204775	8639.34	19302.4	2519.17	17214.3	33306.7	5196.57	Filtered	5986.87	42842.7	10023.2	8938.41	13079.8	61993.8	60843.6	29436.7	Filtered	7036.29	20304.2	14397.2	Filtered	24163.8	Filtered	73924.9	68033	17367.5	13001.6	Filtered
P04259	Keratin, type II cytoskeletal 6B	K2C6B_HUMAN	4552.68	Filtered	Filtered	Filtered	4860.07	119795	Filtered	Filtered	Filtered	Filtered	Filtered	35029.3	5381.38	7804.87	Filtered	Filtered	Filtered	Filtered	Filtered	277026	Filtered	17114.5	Filtered	Filtered	Filtered	Filtered	Filtered	Filtered	Filtered	Filtered	Filtered	Filtered	67711.8	47417.9	Filtered	2892.5	8528.56	Filtered	Filtered	Filtered	8315.22	Filtered	Filtered	Filtered	3990.06	Filtered	Filtered
Q3SY84;Q14CN4;Q86Y46;Q7RTS7	Keratin, type II cytoskeletal 71;Keratin, type II cytoskeletal 72;Keratin, type II cytoskeletal 73;Keratin, type II cytoskeletal 74	K2C71_HUMAN;K2C72_HUMAN;K2C73_HUMAN;K2C74_HUMAN	15145.3	10187.7	18729.4	5360.33	26907.5	198248	5850.89	29160.5	15576.2	26004.7	5488.47	36008.2	9233.35	36754.5	11892.4	25113.3	Filtered	23983.7	27706	23609.3	22336.6	4118.8	15213.2	8888.06	95748.2	17730.4	9613.24	28501.4	40840.9	14590	29783	55585.5	13176.3	21869.2	78523.9	3467.79	23888	23860.5	13499.4	83894.6	12673	15452.6	518234	53071.1	7359.41	17067.2	13742.7
P29622	Kallistatin	KAIN_HUMAN	109878	80876.6	60222.9	63004.7	54479.7	24037.9	35563	53585.1	13950.2	65944.7	73245.4	85382.4	52066	62587.3	60007.1	49672.3	32982.3	71179.9	67922.9	43239.6	38595.5	70330.9	60207.1	62437.8	73219.7	105793	102224	53026	82800.9	153898	34414.2	74129.2	68213.8	22226.8	54159.1	98400.1	62006.6	31331.5	38342.6	133863	43908.2	46925.8	52353.9	47125.1	135184	98690.4	139599
P10721	Mast/stem cell growth factor receptor Kit	KIT_HUMAN	11069	10530.6	240098	163876	10298	121561	16510	13338.4	27325.7	9352.48	10806.6	14797.9	124437	Filtered	13048.7	13970	106026	20451.6	10653.7	25190.3	13735.6	690044	19069.2	16021.8	Filtered	26290.8	100130	25156.4	23912.9	18125.8	48055.5	723254	22593	19445	34110.4	12268.9	12626.6	18498.7	11877.9	18727.3	7645.25	25165.1	4673.55	23993.2	18863.1	20761.1	15150.2
P03952	Plasma kallikrein	KLKB1_HUMAN	280556	280728	247312	235514	273962	224412	301245	292185	138646	198164	308694	266949	198315	256686	398497	281511	250276	146201	234333	198610	164044	236297	293245	329802	704276	391094	1.00393e+06	1.00201e+06	825798	1.85676e+06	361664	467386	861014	606510	798492	1090748	688716	1.17762e+06	609897	2517395	1.03698e+06	712699	5410842	607342	520934	537531	387094
P01042	Kininogen-1	KNG1_HUMAN	2804801	2.89611e+06	2.08784e+06	2.14685e+06	1.81932e+06	2.40716e+06	2412742	2134533	1.83596e+06	2603201	2.03141e+06	2.17071e+06	1.03692e+06	1.92236e+06	2244800	2495111	1698353	1.88257e+06	1.79293e+06	1.94003e+06	1.2695e+06	1.74235e+06	1236338	1788050	2.3186e+06	2.11006e+06	775360	680726	1.13423e+06	1.06363e+06	748648	521992	2.02832e+06	361778	1.38857e+06	1.04798e+06	999739	658595	394416	2.19663e+06	730985	985758	5209270	1.00357e+06	2845383	2.28114e+06	1.49952e+06
P14618	Pyruvate kinase isozymes M1/M2	KPYM_HUMAN	2455.51	Filtered	3047.54	Filtered	Filtered	Filtered	Filtered	1639.46	1172.74	Filtered	41893.8	4450.95	Filtered	2441.11	2694.36	1796.65	Filtered	Filtered	2932.95	3725.54	126318	Filtered	Filtered	Filtered	Filtered	588.377	Filtered	7225.02	6910.12	13297.2	3301.84	Filtered	6167.6	10235.9	5355	Filtered	11743.6	11476.4	5207.07	Filtered	4191.72	2162.38	Filtered	Filtered	Filtered	5877.67	2849.18
P01594	Ig kappa chain V-I region AU	KV102_HUMAN	244402	1.11688e+06	511250	998707	611123	506682	324605	335309	405095	287553	497771	616553	468902	1.31706e+06	847230	829425	677175	1.60098e+06	348897	650525	650636	732068	657993	881304	7538695	378679	295277	253547	256390	310701	448870	470380	270478	258231	325767	372803	472184	241479	460092	450025	771553	377151	8614462	521266	928051	1.04569e+06	794072
P01597	Ig kappa chain V-I region DEE	KV105_HUMAN	Filtered	10520.1	10977.5	Filtered	Filtered	Filtered	Filtered	6191.16	16248.7	Filtered	7739.3	Filtered	Filtered	23108.5	Filtered	7942.37	Filtered	Filtered	Filtered	Filtered	Filtered	Filtered	Filtered	16034.3	Filtered	3732.9	Filtered	Filtered	Filtered	Filtered	Filtered	5927.15	Filtered	Filtered	Filtered	Filtered	4051.3	16091.7	Filtered	Filtered	5742.95	6245.55	Filtered	Filtered	Filtered	9211.03	Filtered
P01598	Ig kappa chain V-I region EU	KV106_HUMAN	146441	1.90215e+06	789153	386765	337257	706126	746636	578287	659585	227244	644188	491815	543796	753319	863448	644880	857961	609876	372092	404801	488738	798007	671816	939104	5.18247e+06	303364	309332	380099	285845	360898	440062	454935	259958	348128	321320	268110	473332	268422	442790	443430	942962	309655	4107557	156804	438621	1.147e+06	490495
P01601	Ig kappa chain V-I region HK101 (Fragment)	KV109_HUMAN	Filtered	91401.3	23199.3	6478.62	11883	23755	26771.8	18004.9	26757.1	Filtered	32922.8	23940.3	19232.5	62681.3	47594.6	29501.4	34587.8	31454.7	9990.8	18685.6	Filtered	24788.8	18360.2	63376	64718.8	14549.2	Filtered	5970.78	5575.32	8329.38	23871.2	27666.3	11460.5	27654.6	20444	10798.7	36112.2	42182.4	39902.2	Filtered	20932.2	6191.5	Filtered	Filtered	11204.1	33486	5115.46
P01602	Ig kappa chain V-I region HK102 (Fragment)	KV110_HUMAN	Filtered	10278.2	4569.6	Filtered	Filtered	Filtered	4922.04	6535.26	4332.27	Filtered	15262.3	43558	5808.17	14594.5	22503.5	7656.79	4561.14	Filtered	Filtered	Filtered	Filtered	Filtered	6892.4	11757.4	32274.9	Filtered	Filtered	Filtered	Filtered	Filtered	29779.8	44972	26630.8	Filtered	Filtered	Filtered	Filtered	5841.75	17405.5	Filtered	2678.77	Filtered	Filtered	24360.8	Filtered	Filtered	Filtered
P01603	Ig kappa chain V-I region Ka	KV111_HUMAN	Filtered	13679.5	7725.09	5187.96	3389.89	Filtered	8154.41	3699.3	5162.3	Filtered	10248.1	6010.35	6665.82	12731.5	9162.28	4076.97	9033.19	Filtered	4782.25	6478.58	2467.15	9643.95	5720.53	15891.3	17920.4	Filtered	5467.27	3911.09	1164.27	Filtered	2215.69	8116.6	3959.46	2543.83	Filtered	Filtered	Filtered	Filtered	Filtered	Filtered	Filtered	4057.42	5445.72	3944.89	Filtered	5342.76	4301.17
P01604	Ig kappa chain V-I region Kue	KV112_HUMAN	13015.9	23698.6	30700.8	15789.9	10753.7	30745.7	24830.9	5097.51	18724.3	33811.6	20017.6	18806.9	33771.5	39403.3	49141.6	21246	37465.7	33115.2	15353.6	15364	20502.1	30668.6	18264.2	59316.6	90791.6	9854.57	13978.6	13779.8	2645.3	1195.59	14981.7	12976.2	9024.36	6131.27	6606.04	15056.1	10614.9	49016	258254	Filtered	13008.5	10184.5	51020.7	7295.77	22045	19308.3	14221.1
P01605	Ig kappa chain V-I region Lay	KV113_HUMAN	383274	3359622	989407	556216	588732	940189	1.10183e+06	880681	1.28449e+06	211925	1253409	1.08141e+06	1.00607e+06	4.64569e+06	1.66186e+06	675167	1.41891e+06	977946	625186	769439	325966	1.19158e+06	1.33381e+06	1.77907e+06	2.65661e+06	405995	373194	256694	176660	180670	779410	668300	346826	452545	758557	309593	1.80457e+06	922789	1.77119e+06	1.21437e+06	970066	415749	1.62562e+06	530026	962450	1.5224e+06	869929
P01608	Ig kappa chain V-I region Roy	KV116_HUMAN	54300.2	882149	177460	85761.5	111759	40217.1	278343	22093.6	282768	Filtered	290552	266228	196880	980169	406750	16911.1	237975	221107	9343.79	168375	15258.4	337685	23185.3	400020	951359	83862.6	Filtered	62805.5	66119	42587	213271	194913	44823.3	18207.1	243128	47220.2	238968	166912	378334	271712	233235	82468.9	291590	110439	227252	203894	131853
P01609	Ig kappa chain V-I region Scw	KV117_HUMAN	Filtered	14456.7	21052.1	Filtered	7667.11	Filtered	9205.7	7196.57	19474.1	Filtered	Filtered	12589.8	Filtered	27098.9	14491.7	Filtered	13754.1	23370.6	11487.3	Filtered	Filtered	29316.3	6862.2	19505.8	52491.2	5359.93	Filtered	Filtered	Filtered	Filtered	6649.32	Filtered	Filtered	Filtered	Filtered	Filtered	Filtered	Filtered	Filtered	Filtered	Filtered	Filtered	Filtered	Filtered	Filtered	Filtered	Filtered
P01610	Ig kappa chain V-I region WEA	KV118_HUMAN	9422.24	93851.9	44002.6	12352.4	13332	20380.2	28821.5	24633.6	28597	Filtered	21379.5	42197	30191.5	79377.8	55548.9	11144.6	26767.5	37890.2	17672.7	20700.8	Filtered	25249	34445.6	83036.3	217478	16742.9	12882.1	10414.4	4495.82	8163.84	52628	47198.3	21516.2	21076.4	15243.8	11425.8	51182.2	43395.2	43095.9	Filtered	25203.8	16000.5	Filtered	15284.6	13763.1	56594.4	23763.3
P01611	Ig kappa chain V-I region Wes	KV119_HUMAN	41346.1	544858	234065	136109	98280.6	147046	114851	126125	105794	48368.7	123975	204894	103633	439434	250267	146164	214374	172929	85754.9	116063	141109	257900	241402	252656	1671763	74121.8	55429.4	37329.8	54046.2	30700.5	94734.6	118721	75367.5	94382.3	103023	42633.5	186952	136251	239814	207293	223273	190538	Filtered	260659	262598	234463	247126
P01612	Ig kappa chain V-I region Mev	KV120_HUMAN	16045.5	112145	92661.2	49110.7	59323.7	32470.1	48012.9	26420.6	26793.2	37907.4	28912.4	63312.7	52870.7	84079.5	66509.8	62398.3	54419.5	61083.8	42116.3	45178.2	45185.6	54558.3	83364.5	77146.1	388495	48637.5	33275.9	77807.4	44870.7	51797.3	54321.6	29492.9	52880.3	31673.4	43321.4	30238.2	19071.5	35671.8	62994.5	Filtered	32572.9	11943.9	Filtered	119904	31426	49099.7	172073
P01613	Ig kappa chain V-I region Ni	KV121_HUMAN	240169	461698	301717	426386	141184	721442	202706	254070	167618	281315	181315	228589	153156	289921	251221	531556	790620	241774	810487	254188	983003	299400	171828	376022	7.28559e+06	640357	193929	483896	180170	523468	198043	566343	209106	283655	288570	212342	670040	186364	275861	742238	178007	192460	6869974	94376.1	118553	187805	218289
P04430	Ig kappa chain V-I region BAN	KV122_HUMAN	14723.3	95981	38737.6	68564.7	50052.6	96560.6	23444.7	42607.9	27683	31355.2	33856.2	29251.4	28401.6	84725.9	72424.3	56004.6	48785.8	111196	54315.7	50834.4	44074.5	69284.6	75471	103419	305121	44780.6	22309.8	Filtered	5198.13	Filtered	33870.3	52860.6	33803.3	54089.7	62169.1	17207.5	38577.1	78384.1	133585	Filtered	47672.5	14295.6	Filtered	26366.9	70847.2	51969.3	52683
P01615	Ig kappa chain V-II region FR	KV202_HUMAN	2008.17	21628.1	18063.8	13147.3	8662.57	21889.9	22562.6	11162.8	20110	Filtered	12928.1	23099.7	41971.7	32110.9	38130.1	7328.91	14706.9	10945.2	Filtered	19893	Filtered	16574.7	15387.7	34362.1	152684	4458.82	4717.25	Filtered	Filtered	Filtered	9111.34	10908.1	3807.27	23771.6	8557.54	3369.72	14814.8	20972.6	40629.6	Filtered	25658.2	5839.36	Filtered	8181.59	9868.88	6479.91	4776.36
P01617	Ig kappa chain V-II region TEW	KV204_HUMAN	258944	2.82415e+06	1.2285e+06	710483	431854	1000218	1.08229e+06	1.19443e+06	1359153	281607	1.35384e+06	1.09134e+06	1.67799e+06	2.27645e+06	1.4942e+06	1.3033e+06	1.24398e+06	1.46993e+06	571921	1.18708e+06	565520	1.70005e+06	2.36224e+06	1.52525e+06	11480117	743019	503204	554948	306424	325774	611763	1.01681e+06	529130	712165	780626	536623	1.44294e+06	1.19971e+06	2.16445e+06	552036	1.08967e+06	406651	2442994	748456	782099	1150995	537416
P06310	Ig kappa chain V-II region RPMI 6410	KV206_HUMAN	24239.7	150253	63303.7	125472	58022.8	220724	217267	55859.2	198659	51080.7	169659	149878	320266	319002	158800	203552	183235	217427	13927.9	190467	50719.7	83010	180916	212120	381832	42995.9	55621.1	68642.6	75378.6	50138.2	77715.9	135514	72780	100781	108288	59365.9	231831	152621	553466	Filtered	195888	92244.6	Filtered	225735	151539	199651	192712
P01623	Ig kappa chain V-III region WOL	KV305_HUMAN	333491	2916983	1.35752e+06	740429	698680	1.36022e+06	1.52607e+06	1.13257e+06	1.49742e+06	295595	1.61251e+06	1.30952e+06	1419698	3.93725e+06	1860653	931848	1.67998e+06	2160317	628113	1.09811e+06	792910	1470961	1467027	2.00809e+06	6014683	756016	487086	473571	410848	432512	1.05688e+06	1.1224e+06	529222	782261	1229245	551510	2.43926e+06	1.1016e+06	2.6079e+06	2.43993e+06	1.16628e+06	899123	1.31083e+06	736545	1058013	1.92475e+06	1.56732e+06
P01624	Ig kappa chain V-III region POM	KV306_HUMAN	6150.04	40388.3	21859	15322.4	12021	23448.3	22378.7	15814.4	21148.9	6385.96	16537.9	12493.6	24840.3	51600.3	29088.9	16207.6	33331.3	34130.9	16657.1	15348.3	33664.6	53786.4	69466	30103.1	184572	9141.51	14972	Filtered	9045.38	Filtered	19935.4	17179.7	8720.88	18528.2	26902.3	6304.83	22428	15969.2	29721.5	Filtered	24236.1	10800.7	Filtered	15830.3	17972	17310	25743
P04206	Ig kappa chain V-III region GOL	KV307_HUMAN	16864.8	119762	95757.2	25645	34532.7	51190.8	57745	64818.8	92437.3	Filtered	93254.6	74947.3	70540.6	475612	116318	39762.7	83232.2	144641	25139	41989.3	27713.8	117478	64002	126183	205319	31166	27215.3	30785.8	28771	25876.9	44231.6	55993.8	43164.1	49593.6	57579.8	39447.4	191167	26379.2	149504	38377.6	94595.8	Filtered	Filtered	71025.1	53091.3	103168	76995.4
P04433	Ig kappa chain V-III region VG (Fragment)	KV309_HUMAN	422393	7.99341e+06	1.89716e+06	940289	1.02104e+06	1.25637e+06	2.97241e+06	1.39368e+06	2298514	408578	2.50078e+06	2.04418e+06	2676264	3.90376e+06	2.76509e+06	1.88523e+06	2.45283e+06	2.92834e+06	955755	2.47916e+06	1001449	2.86234e+06	2288707	3.07026e+06	5093022	985236	867131	861156	842602	527915	1.69219e+06	2187774	887009	1.17287e+06	1.33755e+06	1.07084e+06	3.25234e+06	2.24426e+06	3.34393e+06	1.55412e+06	3141999	850437	3.0983e+06	1.06052e+06	1.82559e+06	2.36655e+06	1.64618e+06
P04434	Ig kappa chain V-III region VH (Fragment)	KV310_HUMAN	75539.4	158112	48729	44577.4	29124.2	82501.6	58944.1	29832	54731.8	23654	76628.6	52208.7	82489.9	193498	80699.5	55699.7	107017	119868	41716.6	73662.6	49130.6	106069	41694.9	145138	466839	30592.3	40047.9	373742	30296	249894	77856.1	100284	37054	362933	28178.1	306646	644030	65394.3	1.1342e+06	Filtered	14937.3	171770	Filtered	239672	473938	467156	411484
P06311	Ig kappa chain V-III region IARC/BL41	KV311_HUMAN	Filtered	25810.7	13763.8	1165.12	3772.26	Filtered	10288	9065.88	7400.83	Filtered	Filtered	1635.06	5912.01	21226	12435.9	Filtered	11314.8	Filtered	6482.83	Filtered	Filtered	7768.09	5951.21	8492.98	Filtered	4751.6	Filtered	Filtered	Filtered	Filtered	Filtered	Filtered	Filtered	Filtered	Filtered	6858.36	6089.1	6383.72	9977.88	Filtered	6062.82	Filtered	Filtered	Filtered	3561.33	11327	Filtered
P01625	Ig kappa chain V-IV region Len	KV402_HUMAN	41882.6	327572	200410	122395	121491	179065	203209	156044	222017	62731.1	201799	196066	177563	346507	321672	245032	181440	170822	92335.2	135757	121038	340637	280633	442156	82028.3	54116.3	35320	44563.6	22150.9	17669.7	91259.1	158142	71924.1	82169.2	18104.4	44165.2	243824	176049	220887	Filtered	77443.8	65701	Filtered	126481	108861	182679	149962
P06314	Ig kappa chain V-IV region B17	KV404_HUMAN	Filtered	6875.24	3766.61	Filtered	Filtered	Filtered	2099.49	Filtered	1187.49	Filtered	1755.86	Filtered	806.059	Filtered	2634.99	1797.85	2589.17	Filtered	Filtered	Filtered	Filtered	781.772	Filtered	3649.68	14780.5	Filtered	Filtered	Filtered	Filtered	Filtered	Filtered	Filtered	Filtered	Filtered	Filtered	Filtered	1789.85	1428.02	1955.39	Filtered	Filtered	Filtered	Filtered	Filtered	Filtered	1356.37	Filtered
P32004	Neural cell adhesion molecule L1	L1CAM_HUMAN	2121.65	3083.89	3277.34	Filtered	6004.42	Filtered	3193.39	4648.94	Filtered	Filtered	7011.5	2971.15	Filtered	2604.71	Filtered	5202.32	4374.2	4790.75	Filtered	Filtered	5357.02	3736.25	Filtered	Filtered	Filtered	Filtered	2697.43	Filtered	Filtered	Filtered	Filtered	Filtered	1316.14	Filtered	Filtered	1974.94	Filtered	Filtered	Filtered	Filtered	3823.89	Filtered	Filtered	Filtered	8422.33	3129.76	5640.33
P0CG05	Ig lambda-2 chain C regions	LAC2_HUMAN	725828	3.085e+06	2.86725e+06	1.81141e+06	1.72122e+06	2.09529e+06	2.0478e+06	1.78001e+06	2.63352e+06	896845	3.12112e+06	3.51636e+06	2.52307e+06	8111291	3564507	2475822	3.24597e+06	2.17202e+06	1.23384e+06	1490303	2.01583e+06	3565709	2830706	2.82808e+06	13778198	1.41189e+06	2.99711e+06	1.60655e+06	1.07146e+06	2.26888e+06	4198879	6.0717e+06	1.94512e+06	4648065	2.06365e+06	1.51041e+06	4268109	3.38026e+06	4279796	65270340	3.43376e+06	1.69079e+06	24898204	2157099	3.25571e+06	2.17017e+06	3112286
A0M8Q6	Ig lambda-7 chain C region	LAC7_HUMAN	Filtered	183.993	Filtered	1012.21	Filtered	Filtered	Filtered	Filtered	Filtered	Filtered	168.767	Filtered	Filtered	4409.43	2489.4	Filtered	Filtered	Filtered	Filtered	Filtered	Filtered	Filtered	Filtered	Filtered	Filtered	580.419	1043.35	Filtered	Filtered	Filtered	Filtered	639.99	Filtered	Filtered	Filtered	Filtered	Filtered	Filtered	Filtered	Filtered	Filtered	Filtered	Filtered	Filtered	Filtered	Filtered	Filtered
P11279	Lysosome-associated membrane glycoprotein 1	LAMP1_HUMAN	7122.63	5642.66	9557.07	Filtered	7593.32	9362.45	7165.12	7401.2	5486.2	7570.99	5670.74	3595.91	4449.33	Filtered	Filtered	Filtered	6723.28	4940.37	6062.07	4829.13	6935.01	Filtered	5253.2	6392.3	12270	6649.52	12554.7	7608.34	10278.4	11470.3	8628.15	8045.93	8059.38	20229.1	9482.08	12429.7	7796.25	5593.61	13253.8	22864.2	15170.1	19055	37315.6	8918.19	16108	9982.38	10682.9
P13473	Lysosome-associated membrane glycoprotein 2	LAMP2_HUMAN	15136.5	33942.5	23629.6	22650.9	18325.4	67823.5	13422.9	17031.1	17590.3	33086.4	24801.5	14882.6	12017.4	25016.6	29616.2	36847.6	35479.8	41962.1	39585.2	31480.6	34453.6	24561	35246.8	27802	Filtered	28642.5	21235.3	39681.3	16246.5	21079.5	5966.32	16072.1	32534.8	32006.5	10683.4	10980.6	24481.8	7023.35	19636.7	Filtered	12431.3	17030.9	Filtered	18083.2	17079.4	17166.3	16788.8
Q14847	LIM and SH3 domain protein 1	LASP1_HUMAN	1515.39	Filtered	589.489	Filtered	587.441	Filtered	636.303	310.514	401.012	Filtered	754.885	749.622	1455.62	Filtered	Filtered	Filtered	Filtered	Filtered	Filtered	Filtered	Filtered	Filtered	Filtered	Filtered	Filtered	4574.74	Filtered	2668.76	12952.5	8654.66	4309.3	5552.97	589.443	1004.45	3136.05	3876.49	4442.88	2526.97	2278.98	Filtered	4815.56	6670.45	Filtered	1455.28	1551.44	Filtered	5627.2
P18428	Lipopolysaccharide-binding protein	LBP_HUMAN	8222	7542.26	5004.89	2729.66	4909.92	2726.3	2878.1	5895.76	2647.98	5501.51	7129.99	6192.89	1908.68	3077.82	5014.87	2755.46	2744.24	3713.74	11927.5	4096.78	2831.35	6833.77	1429.97	8106.05	Filtered	4090.07	2861.02	Filtered	Filtered	Filtered	3301.94	Filtered	2968.88	Filtered	5009.19	Filtered	Filtered	Filtered	Filtered	Filtered	Filtered	Filtered	Filtered	5188.05	Filtered	Filtered	Filtered
Q5VSP4;P31025	Putative lipocalin 1-like protein 1;Lipocalin-1	LC1L1_HUMAN;LCN1_HUMAN	Filtered	Filtered	Filtered	Filtered	Filtered	Filtered	Filtered	1666.15	3109.23	Filtered	Filtered	Filtered	464.781	Filtered	Filtered	Filtered	Filtered	Filtered	Filtered	948.033	Filtered	Filtered	Filtered	Filtered	Filtered	2294.35	Filtered	Filtered	Filtered	Filtered	Filtered	651.535	3032.17	1286.53	Filtered	Filtered	1001.88	Filtered	Filtered	Filtered	Filtered	Filtered	Filtered	Filtered	Filtered	Filtered	Filtered
P04180	Phosphatidylcholine-sterol acyltransferase	LCAT_HUMAN	28657.6	45057.4	38596.1	20823.8	21730.7	25158.9	18078.7	26804.8	15549.2	42873.3	31208.8	37551	16425.6	35282.5	8459.76	9060.93	Filtered	Filtered	14394.5	14767.7	13686.7	41910.6	9844.71	43506	56801.2	37302.2	7826.9	Filtered	6149.08	14197	9282.22	13378.7	24739.1	Filtered	17709.6	7132.02	Filtered	Filtered	Filtered	Filtered	Filtered	Filtered	Filtered	Filtered	Filtered	Filtered	Filtered
P00338	L-lactate dehydrogenase A chain	LDHA_HUMAN	9109.64	1340.67	5635.48	12389.8	10553.8	Filtered	9322.43	7102.64	5312.27	45393.8	30689.6	5848.41	6391.29	1659.25	936.518	4089.14	13042.5	9110.37	15699.2	1485.64	19468.4	4843.52	6050.9	Filtered	23129.1	29374.9	4531.83	27095.1	10591.7	34356.1	4752.21	7314.22	7578.33	3930.69	14170.7	30673.4	15905.3	16949.2	15784.7	34753.6	6061.78	11155.5	29749.4	6554.02	11822	8957.72	12512
P07195	L-lactate dehydrogenase B chain	LDHB_HUMAN	18476.8	10497.5	18646.1	12928.3	17163.7	10178.9	20232.5	12107.4	13667.5	19246.2	25738.9	9700.11	17586.9	8778.41	11677.9	14097.5	14475.8	32126.7	11903.7	13869.6	14669.6	17926	11420.6	9965.78	9658.88	19865.6	7438.53	8097.65	9392.59	9754.65	12437	6391.84	12308.1	Filtered	14045.2	14165.9	9110.1	23374.5	14165.9	16231.2	5259.36	8068.35	Filtered	11673.3	17555.5	11444.1	10620.5
O14960	Leukocyte cell-derived chemotaxin-2	LECT2_HUMAN	Filtered	Filtered	Filtered	Filtered	Filtered	Filtered	1724.02	Filtered	Filtered	Filtered	Filtered	1681.39	Filtered	Filtered	Filtered	Filtered	355.412	Filtered	Filtered	Filtered	Filtered	Filtered	Filtered	Filtered	Filtered	1699.66	13731.1	9012.06	8226.92	9282.76	Filtered	5197.93	5986.51	11198.1	6440.29	6643.22	12169.2	10116.2	4590.48	Filtered	7594.21	Filtered	Filtered	5301.51	Filtered	6120.7	11780.7
Q08380	Galectin-3-binding protein	LG3BP_HUMAN	73003.1	171579	139524	133994	84324.1	140320	66808.7	81174	191765	127220	70406.2	71621.1	60261.8	276913	131375	73238.7	91609.1	105279	110732	104081	160555	101481	234800	68047.5	96856	112454	30362.3	19735.9	26408.3	40085.7	38140.2	19390.4	45963.5	34851.1	60031.6	26329.7	46268.3	22173.1	25011.6	55904.5	26895.6	26956.8	482387	30163.5	66462.9	86289.1	44369.4
Q8N6C8	Leukocyte immunoglobulin-like receptor subfamily A member 3	LIRA3_HUMAN	Filtered	Filtered	Filtered	Filtered	Filtered	12517.1	Filtered	6285.45	Filtered	Filtered	4741.6	4774.11	2063.57	92758	Filtered	Filtered	Filtered	5943.72	Filtered	Filtered	Filtered	8020.82	Filtered	7615.19	Filtered	Filtered	Filtered	Filtered	Filtered	38476.8	Filtered	12205.6	Filtered	35418.1	Filtered	Filtered	Filtered	Filtered	Filtered	Filtered	13668.3	11155.8	Filtered	8978.69	Filtered	6718.26	9695.1
Q12907	Vesicular integral-membrane protein VIP36	LMAN2_HUMAN	Filtered	Filtered	Filtered	Filtered	Filtered	Filtered	Filtered	Filtered	Filtered	Filtered	Filtered	Filtered	Filtered	Filtered	Filtered	Filtered	Filtered	Filtered	Filtered	Filtered	Filtered	Filtered	Filtered	Filtered	Filtered	Filtered	936.403	1336.68	2071	2506.24	Filtered	Filtered	Filtered	Filtered	Filtered	Filtered	Filtered	Filtered	Filtered	Filtered	Filtered	Filtered	Filtered	Filtered	Filtered	Filtered	Filtered
P02545	Prelamin-A/C	LMNA_HUMAN	Filtered	Filtered	Filtered	Filtered	Filtered	Filtered	Filtered	Filtered	Filtered	Filtered	13834.7	Filtered	Filtered	Filtered	Filtered	Filtered	Filtered	Filtered	Filtered	Filtered	Filtered	Filtered	Filtered	Filtered	Filtered	Filtered	Filtered	Filtered	8680.53	Filtered	Filtered	Filtered	Filtered	Filtered	Filtered	Filtered	Filtered	Filtered	Filtered	Filtered	Filtered	Filtered	Filtered	Filtered	Filtered	Filtered	Filtered
Q07954	Prolow-density lipoprotein receptor-related protein 1	LRP1_HUMAN	6884.88	17582.3	5106.5	6272.63	5020.33	3919.28	5740.06	7008.49	3442.45	10576.2	5193.75	3810.06	4993.79	6547.55	15798.5	3151.64	6283.37	6107.49	3563.15	4326.97	11430.3	5017.69	3005.57	8983.76	Filtered	6982.78	14519.8	23378.1	12265.1	21188.9	8065.74	12321	12702.1	22040.9	6110.41	8413.33	15161.8	8063.8	16402.5	24090.7	13083.7	14457.8	26664.4	20574	15004.1	7143.73	14294.2
Q13449	Limbic system-associated membrane protein	LSAMP_HUMAN	3944.04	Filtered	5277.81	2249.24	Filtered	Filtered	3853.03	Filtered	5145.29	Filtered	Filtered	4385.18	3057.72	Filtered	3642.59	Filtered	5903.54	Filtered	Filtered	3196.69	Filtered	Filtered	4649.01	2054.26	Filtered	Filtered	9960.46	14217.5	3656.15	Filtered	Filtered	Filtered	5061.87	Filtered	Filtered	Filtered	Filtered	Filtered	Filtered	Filtered	22501.6	6200.89	Filtered	Filtered	Filtered	Filtered	15027.2
P51884	Lumican	LUM_HUMAN	438273	291146	305825	238386	333627	364424	470111	362264	316422	310791	313643	325497	302047	428208	296793	294582	385324	349677	299500	365216	330461	324949	438638	409323	234221	607880	110503	156664	199138	351583	170193	137574	275286	143209	195844	211936	155260	151338	139429	276856	181095	205599	169937	125661	423565	405198	322206
P04211	Ig lambda chain V region 4A	LV001_HUMAN	51941.4	357457	292052	94418.1	106933	106020	250185	139349	251012	95955.1	276615	336686	150294	384578	289204	175607	277016	125967	136898	278765	224681	376087	242798	391846	825111	296070	192566	190228	197390	155544	188646	536193	260392	712964	349161	233611	1.4555e+06	591954	1.32942e+06	532012	496521	395702	215135	669893	547114	817661	567819
P01700	Ig lambda chain V-I region HA	LV102_HUMAN	38127	139677	159273	81224.8	82229.4	121656	81168	60361.3	120087	53214.3	197679	214230	159051	336301	196037	79927.6	150538	105352	99510.4	55392.8	92202.1	201209	89803.5	183225	1.35393e+06	46911.5	83172.6	75219.6	34167.3	77347.2	157108	109413	56846.5	130789	93781.1	40077.8	98234.7	81884.2	138650	894174	102389	63859.5	Filtered	49393.4	123261	61774.9	135480
P01701	Ig lambda chain V-I region NEW	LV103_HUMAN	667983	1.58468e+06	780698	790725	498280	1.19707e+06	840583	572320	761214	363584	520850	1.6574e+06	973448	1.11512e+06	726893	847796	809292	1290970	701968	1.40932e+06	2.53686e+06	1.32276e+06	1.11033e+06	1.07938e+06	5.36714e+06	961744	1.39023e+06	975461	234249	1.85097e+06	2.55102e+06	1.93419e+06	661328	2.23813e+06	910722	596744	3.68201e+06	1.85152e+06	1.31953e+06	53418300	1.7421e+06	856132	212865392	2.4255e+06	754415	1.69512e+06	2176384
P01702;P06316	Ig lambda chain V-I region NIG-64;Ig lambda chain V-I region BL2	LV104_HUMAN;LV107_HUMAN	16076.7	88935.5	67442.1	46920.5	40093	38922.5	45352.1	52597.4	64073.4	8475.52	42959.2	88516.2	29342.9	75051.9	45386.2	37418.7	44503.6	43832.5	31395.1	26779.3	32384.8	41732.9	41391.3	53511.3	155668	25942.3	25730.1	12782.8	Filtered	11411	40349.1	61932.2	19390.6	40956.2	21429.1	38553.6	195683	79317.3	140970	63487	117044	30612.7	107227	70082.4	33129.1	34320.1	34966.9
P01703	Ig lambda chain V-I region NEWM	LV105_HUMAN	394346	3.87162e+06	1.21275e+06	1.02896e+06	1.24899e+06	1.62595e+06	1.40734e+06	498700	2181641	1.14822e+06	2.15414e+06	728630	1.92792e+06	4.04926e+06	1.09337e+06	1.40942e+06	838527	2.21677e+06	2313994	1.78923e+06	2.62926e+06	2726934	1.53703e+06	2.63955e+06	19758188	957146	1378832	3.01215e+06	472274	843414	2.3148e+06	961622	1.08921e+06	2.40483e+06	621494	1.7271e+06	1.16111e+06	585900	1.2006e+06	27801596	2.38642e+06	594405	145695888	1.73018e+06	2.02102e+06	1.12749e+06	3.0044e+06
P04208	Ig lambda chain V-I region WAH	LV106_HUMAN	576640	3.40299e+06	2281370	1.14168e+06	1.08205e+06	1.5231e+06	1.08862e+06	1.08152e+06	1.92278e+06	543058	2.03444e+06	1.95188e+06	1.96631e+06	4844791	1.69028e+06	1442489	1.64443e+06	1172124	750606	802249	1.3214e+06	3.06266e+06	1.92655e+06	2313979	24326602	876243	970496	1.26049e+06	623494	817250	1.84506e+06	1.66146e+06	1.32952e+06	2.36787e+06	1.79786e+06	1.2251e+06	2085561	1.70155e+06	2.38338e+06	5.97413e+06	1991411	789491	129379448	1.74056e+06	1.4714e+06	1.3153e+06	1.7502e+06
P01707	Ig lambda chain V-II region TRO	LV204_HUMAN	Filtered	10929.4	4661.9	Filtered	3500.74	3220.31	1650.07	2864.34	11289.3	Filtered	10811	1695.02	3637.7	6938.65	19460.1	4831.76	860.492	Filtered	Filtered	3553.51	Filtered	23805.4	Filtered	6597.77	Filtered	4424.17	5321.88	Filtered	Filtered	Filtered	5072.7	7890.06	1865.32	6684.7	7981.95	Filtered	3980.47	6783.43	21723	349615	6100.92	Filtered	Filtered	Filtered	2017.55	5171.29	6194.41
P01708	Ig lambda chain V-II region BUR	LV205_HUMAN	667.152	7909.66	12993.4	5042.78	6794.51	5309.86	8701.11	10712.7	12231.6	Filtered	9654.26	12991.4	7391.03	18020.3	12517.4	9865.78	8266.52	4512.52	4916.96	5412.61	4309.01	5695.19	9303.24	5840.52	Filtered	2619.08	2105.14	2595.37	Filtered	Filtered	8733.28	13682.9	4016.94	5799.77	8845.42	5855.71	25006.6	19973.4	27841.3	Filtered	10711	10794.5	Filtered	Filtered	Filtered	6942.89	Filtered
P01709	Ig lambda chain V-II region MGC	LV206_HUMAN	6953.66	Filtered	Filtered	1565.72	Filtered	Filtered	Filtered	Filtered	10408.6	Filtered	Filtered	5035.28	Filtered	16716.6	9743.34	7847.12	3136.09	4810.59	Filtered	9511.04	Filtered	Filtered	Filtered	Filtered	Filtered	Filtered	Filtered	Filtered	Filtered	Filtered	3552.75	22795.6	Filtered	4762.77	Filtered	Filtered	8021.22	5087.72	Filtered	Filtered	15927.5	Filtered	Filtered	Filtered	Filtered	Filtered	Filtered
P04209	Ig lambda chain V-II region NIG-84	LV211_HUMAN	10697.5	86253.5	64267.1	17832.4	38659	33811	55058.4	50588.9	44386.2	34700.2	85424.8	72818.6	99745.7	64768.6	37102.3	79387.8	85068.2	46615.8	15493.8	72103	8109.55	10435.6	30964.3	23616.6	Filtered	14949.8	18423.6	6884.91	14472.5	Filtered	46739.9	22226.8	17642.7	20511.7	13611.8	6989.14	69194.9	31391.3	151720	Filtered	20542.2	8029.78	Filtered	14186.4	29040.6	55495.6	41679.7
P01714	Ig lambda chain V-III region SH	LV301_HUMAN	10507.3	62237.1	67595.4	48241.7	31367.3	36571.7	43834.9	40315	55130.5	18517.3	81459.4	55537.3	59313.6	157558	58007.9	68219.6	41108.9	34498.1	28223.2	37105.3	44240.7	115666	53828.4	49051.6	354466	34356.8	40162.2	8143.97	9436.61	20063	50294.8	50726.8	42397.1	53452.5	50181.1	13270.6	64404.9	48535.2	68371.2	Filtered	72033.5	46729.6	Filtered	68257.7	43900.8	34485.6	109471
P80748	Ig lambda chain V-III region LOI	LV302_HUMAN	390196	1.25055e+06	1.9173e+06	840872	965700	1.2922e+06	1156700	787952	1.46074e+06	433680	1.75041e+06	1.72486e+06	1.45926e+06	4246305	1.55574e+06	956276	1.51972e+06	1.00716e+06	486810	633075	782098	1.57674e+06	1172932	2.126e+06	11389154	445996	973757	472737	444780	541475	1.28128e+06	2687818	481866	1.20529e+06	908442	484797	2.51189e+06	2285510	3.75836e+06	3.47861e+06	2413790	865444	2.42015e+06	1.10016e+06	1.59134e+06	787876	1.08334e+06
P01717	Ig lambda chain V-IV region Hil	LV403_HUMAN	157498	835074	766932	415897	367284	572697	205806	330176	308419	184084	930989	808729	765920	1.79128e+06	785511	568993	674419	545691	644332	349637	545853	902532	396538	478148	8356590	344195	486723	242591	181526	345521	501531	500546	497429	980671	466496	154820	458600	348835	899963	733739	404600	181321	2771092	319036	530838	263783	448073
P01719	Ig lambda chain V-V region DEL	LV501_HUMAN	Filtered	Filtered	2551.14	Filtered	2009.17	Filtered	9109.92	Filtered	Filtered	Filtered	3131.28	5978.53	1988.35	10447	Filtered	7114.42	Filtered	Filtered	Filtered	Filtered	Filtered	Filtered	Filtered	Filtered	Filtered	Filtered	Filtered	Filtered	Filtered	Filtered	2877.87	6122.04	Filtered	3806.04	3186.86	Filtered	2473.86	7854.98	4560.84	Filtered	3752.41	Filtered	Filtered	Filtered	Filtered	Filtered	Filtered
P06317	Ig lambda chain V-VI region SUT	LV603_HUMAN	1442.63	3200.22	4190.06	Filtered	Filtered	Filtered	2452.68	1528.21	5366.83	Filtered	9710.48	3503.36	6965.63	27729.8	7439.61	2866.55	3394.22	Filtered	Filtered	Filtered	Filtered	10250.4	Filtered	Filtered	Filtered	Filtered	4478.18	Filtered	8248.46	Filtered	6479.64	7458.51	5464.71	7651.71	3902.77	3361.33	Filtered	6468.77	4798.12	Filtered	7243.18	Filtered	Filtered	2927.93	2287.85	1606.2	Filtered
P14151	L-selectin	LYAM1_HUMAN	60384.5	106715	115387	76650.7	88368.4	130410	95408.7	97004.5	116811	92784.5	54505.8	72594.6	95702	61673.5	62330.2	49320.3	97812.1	103221	62205.3	72358.6	50493.6	55125.1	91922.1	62592.1	Filtered	79175.6	191274	70492.6	266277	89078.3	202814	248867	96208.2	196158	141057	175378	275384	214501	252571	596476	200852	173890	Filtered	147042	98208.4	98649.6	119725
P16109	P-selectin	LYAM3_HUMAN	Filtered	Filtered	Filtered	Filtered	Filtered	Filtered	Filtered	Filtered	Filtered	Filtered	Filtered	Filtered	Filtered	Filtered	Filtered	Filtered	Filtered	Filtered	Filtered	Filtered	Filtered	Filtered	Filtered	Filtered	Filtered	Filtered	Filtered	Filtered	8393.81	Filtered	Filtered	Filtered	Filtered	Filtered	Filtered	1822.14	1693.96	2887.53	Filtered	Filtered	Filtered	2001.67	Filtered	Filtered	Filtered	Filtered	Filtered
P28300	Protein-lysine 6-oxidase	LYOX_HUMAN	Filtered	Filtered	Filtered	Filtered	Filtered	Filtered	Filtered	Filtered	Filtered	Filtered	Filtered	1115.06	Filtered	Filtered	Filtered	Filtered	Filtered	Filtered	Filtered	Filtered	Filtered	Filtered	Filtered	Filtered	Filtered	Filtered	4637.6	13687	5031.46	6819.23	1661.09	2162.53	Filtered	7487.92	897.966	7588.53	2259.53	2643.63	2086.39	3564.65	3121.13	7788.63	Filtered	Filtered	Filtered	Filtered	8517.24
P61626	Lysozyme C	LYSC_HUMAN	80922.1	84210.3	145295	22574.1	49629.7	65283.7	53676.3	91276.4	56295.2	42175.2	36266.9	36271	40852.6	46570.8	29818.6	25565.3	40940.2	45307.4	48405.3	36986.4	35533	43565.3	36841.8	25603.8	26042.4	77637.1	471079	575046	272724	326842	280081	296505	187142	506199	178254	405677	355345	265260	197118	2165750	381887	238432	Filtered	401888	236587	124875	312081
Q9Y5Y7	Lymphatic vessel endothelial hyaluronic acid receptor 1	LYVE1_HUMAN	15614.3	14403.8	15223.1	1496.25	15453.1	29968.7	35540.3	19007	24549.8	Filtered	9236.47	9489.1	21575.7	16251.7	12489.9	10785	14651.5	15276.7	14551.5	24572.3	Filtered	14357.1	23200	21154.9	Filtered	11510.4	15612.3	26821.8	29123.8	27073.1	31604	38627.4	35775.8	25999.3	46204.7	20257.2	20906.9	15958	51026	132199	16345.6	26514.8	20710.9	34141.7	41022.1	22817.8	41948.7
P33908	Mannosyl-oligosaccharide 1,2-alpha-mannosidase IA	MA1A1_HUMAN	25111.2	38109.4	23731.3	22270.6	27273	24047.1	28209.7	28154.4	40418.2	16070.8	16830.9	19311.3	28918.3	32241.1	25525.8	13404.2	30473.5	30178	20756.8	21869.3	29333.8	31677.6	27991.7	20979.4	84405	48133.6	2042.7	Filtered	3179.34	3286.45	2694.71	Filtered	2736.32	Filtered	Filtered	8736.12	3027.25	Filtered	Filtered	9871.28	Filtered	3401.86	205460	6733.26	7863.73	4953.1	Filtered
O00462	Beta-mannosidase	MANBA_HUMAN	6183.6	3388.64	6559.38	Filtered	2971.55	Filtered	5400.08	8178.28	5475.38	Filtered	11103.3	2590.47	Filtered	Filtered	5871.5	3610.74	10202.5	4759.67	9063.24	7339.11	Filtered	Filtered	301.819	Filtered	7730.38	2089.83	5792.22	9035.55	3663.9	11822.2	4637.9	4394.96	13611.9	9167.29	4462.55	8377.1	7070.73	3295.19	Filtered	13157.4	7855.91	12950.8	24811.5	Filtered	Filtered	Filtered	11269.1
Q9H8J5	MANSC domain-containing protein 1	MANS1_HUMAN	Filtered	Filtered	907.696	Filtered	Filtered	Filtered	3242.57	Filtered	Filtered	Filtered	Filtered	Filtered	Filtered	Filtered	Filtered	Filtered	Filtered	Filtered	Filtered	Filtered	Filtered	Filtered	Filtered	Filtered	Filtered	Filtered	4280.59	1963.91	3767.52	Filtered	2953.07	2643.06	2968.86	Filtered	2119.69	Filtered	3199.47	2897.24	Filtered	Filtered	1498.1	481.125	Filtered	8692.34	6584.51	Filtered	Filtered
Q15691	Microtubule-associated protein RP/EB family member 1	MARE1_HUMAN	Filtered	Filtered	Filtered	Filtered	Filtered	Filtered	14055.6	Filtered	Filtered	Filtered	1857.41	Filtered	Filtered	Filtered	Filtered	Filtered	Filtered	Filtered	Filtered	Filtered	Filtered	Filtered	Filtered	Filtered	Filtered	Filtered	Filtered	Filtered	Filtered	Filtered	Filtered	Filtered	Filtered	Filtered	Filtered	Filtered	Filtered	Filtered	Filtered	Filtered	Filtered	Filtered	Filtered	Filtered	Filtered	Filtered	Filtered
P48740	Mannan-binding lectin serine protease 1	MASP1_HUMAN	69458.3	60987.3	60745.6	53534.8	34396.7	55261	40540.2	51766.5	39880.6	52406.5	47768.9	58117.1	53233.8	64092.7	49616.5	74673.2	51960.7	116644	49668	68279.1	58740.9	68846.7	57175.5	54303.1	710883	73992.1	10539.8	16089.7	13964.2	39269.2	23917	18254.3	18448.1	7556.33	22964.9	20092.5	8084.68	10493.2	7392.96	Filtered	13867.6	11151	Filtered	Filtered	12610.3	10305.4	16668.3
O00187	Mannan-binding lectin serine protease 2	MASP2_HUMAN	89399	54445.1	48764.7	74323.3	24900	38542.2	41603.4	45957.2	58361.1	48666.8	34090.7	75181.5	79342.6	68674.4	61088.5	73904.4	61283.8	85114.7	55123.8	45442.8	84334.5	101079	48623.4	58352.7	45559.8	88601.6	Filtered	9154.71	6500.97	30036.9	20491.7	13687.2	10242.2	10538.4	16240.8	22250.5	11121	20896.3	25359.6	Filtered	15012.3	15667.5	Filtered	9283.54	35076.4	20462.1	29970.1
P11226	Mannose-binding protein C	MBL2_HUMAN	57767.2	27308.6	35385.9	60873.9	79026.5	23587.8	28611.9	65040.6	169724	45061.8	22139.9	60761.1	47383	31147.1	40960.9	20800.5	115931	74823.8	48980.2	10409.1	30606.7	81094.2	17938.4	61168.3	412503	144252	255231	272347	60946.7	89901.5	162388	163846	33894.7	189801	262520	111098	138654	98287.3	686050	284086	464608	140710	1.50566e+06	91197.7	105521	60410.8	73602.9
P40925	Malate dehydrogenase, cytoplasmic	MDHC_HUMAN	14005.5	Filtered	23915.9	Filtered	9370.5	Filtered	Filtered	Filtered	Filtered	11336.5	20374.2	18521.5	9345.64	Filtered	Filtered	6914.07	Filtered	Filtered	Filtered	Filtered	Filtered	2437.91	Filtered	Filtered	Filtered	281.965	7017.29	7421.12	7644.07	6299.22	8801.22	4716.41	6305.59	3769.62	10769.5	11116.1	5623.69	8082.97	9117.13	19706.1	Filtered	14716.7	28207.4	Filtered	7765.75	Filtered	8000.09
Q7Z7M0	Multiple epidermal growth factor-like domains protein 8	MEGF8_HUMAN	7650.44	11839.3	6867.11	5914.17	6970.07	11746.1	9015.4	5883.13	12093.9	12853.4	6910.5	6151.53	7455.84	7882.94	9974.97	7374.26	10842.7	12948.2	8355.91	8009.91	11337.5	4938.63	10316.4	8345.67	16914.7	16173.2	12959	15676.8	11397.2	15827.1	9826.38	16277.7	13762.8	16922.2	10427.4	14900.9	12583.3	11930.9	8579.38	17538.3	19040	13573.8	Filtered	11512.3	10924.8	10450.7	11294.5
Q12866	Tyrosine-protein kinase Mer	MERTK_HUMAN	719.84	2843.89	5365.93	Filtered	4947.92	Filtered	4383.09	4612.5	2863.32	3960.29	Filtered	2889.78	2488.15	2278.85	3019.72	3924.91	2341.61	Filtered	1612.46	Filtered	Filtered	1849.77	539.436	1176.67	Filtered	3384.41	11055.2	6091.15	7168	9205.19	4255.55	4153.71	4931.17	11882.2	4286.98	2663.35	2517.25	2470.48	4806.8	21300.7	Filtered	6300.85	Filtered	9916.53	9623.01	3591.61	3915.14
P08493	Matrix Gla protein	MGP_HUMAN	4587.61	5491.1	Filtered	Filtered	Filtered	Filtered	11165.7	Filtered	6853.16	Filtered	4874.73	5269.94	8414.4	Filtered	8451.1	5033.13	9244.19	Filtered	7016.15	Filtered	Filtered	Filtered	Filtered	10360.6	45712.3	7658.76	Filtered	Filtered	Filtered	3223.67	4822.35	Filtered	4440.21	7183	Filtered	Filtered	Filtered	Filtered	Filtered	Filtered	Filtered	Filtered	Filtered	Filtered	4048.03	Filtered	Filtered
P14780	Matrix metalloproteinase-9	MMP9_HUMAN	11924.3	25321.6	5800.77	6443.75	14866.8	13162.7	6752.82	13153.1	4191.39	9438.84	14859.3	10724.5	3157.35	2197.85	5451.39	4812.14	1061.97	8872.8	13737.9	3425.35	2751.24	5577.65	10001.4	2216.65	29123.5	20912.6	4812.36	6213.36	17480.6	16873.1	7902.91	13125.9	18155.7	3897.82	12777.2	33684.2	16373.9	3936.19	5935.8	27986.9	6445.9	26699.6	Filtered	2045.74	18981.8	8403.82	8874.77
Q13201	Multimerin-1	MMRN1_HUMAN	7652.97	7340.37	1017.18	11415.5	6006.61	Filtered	8840.79	8840.65	6343.81	9898.98	5646.24	7501.98	8526.23	9606.58	4994.61	9831.68	7350.69	8301.11	9515.58	12917.2	Filtered	Filtered	8025.19	5571.07	63818.2	9938.48	7682.2	10213.3	11059.6	14678.8	7513.23	10548.4	10993.2	31604.9	13157.7	13153	7949.68	14349.3	9080.55	Filtered	12190.3	21003.1	Filtered	27787.1	12210.3	8411.85	24872.3
P26038	Moesin	MOES_HUMAN	2881.26	8150.99	2793.82	1761.63	3747.22	42324.1	3845.78	2541.46	1781.13	5362.64	9675.07	2981.56	2244.79	1274.96	2596.88	1568.26	2084.8	Filtered	1550.13	3260.61	Filtered	Filtered	1586.38	898.137	Filtered	3683.26	1367.93	Filtered	Filtered	Filtered	611.177	2772.53	796.648	Filtered	2415.79	4366.99	Filtered	Filtered	Filtered	Filtered	5911.25	8056.52	Filtered	Filtered	36302.2	45905.4	9034.13
P11717	Cation-independent mannose-6-phosphate receptor	MPRI_HUMAN	3050.93	Filtered	1134.99	3154.73	3083.96	Filtered	2936.73	2372.4	2274.31	1901.63	3513.21	4534.07	3314.54	3010.32	2454.8	2017.82	2802.41	2686.53	3378.14	Filtered	Filtered	1853.28	1765.06	630.546	Filtered	3036.01	8164.37	7548.37	6145.52	11770.3	3184.68	5441.85	5571.2	8350	5030.25	3765.72	5585.07	5764.03	6155.89	6964.15	4679.13	4883.57	8129.74	8833.07	6788.18	4823.17	3949.56
Q13421	Mesothelin	MSLN_HUMAN	Filtered	Filtered	Filtered	Filtered	Filtered	Filtered	6549.64	Filtered	5639.71	Filtered	Filtered	3692.27	Filtered	5315.01	Filtered	Filtered	4096.5	Filtered	Filtered	Filtered	Filtered	Filtered	Filtered	Filtered	Filtered	1838.58	Filtered	Filtered	Filtered	2376.12	Filtered	Filtered	Filtered	Filtered	Filtered	Filtered	Filtered	Filtered	Filtered	Filtered	Filtered	Filtered	Filtered	Filtered	Filtered	Filtered	Filtered
P43121	Cell surface glycoprotein MUC18	MUC18_HUMAN	37982.9	28285.6	32397	26948.1	27868.3	49403.5	56613.7	33441.2	29175.8	39011.3	22701.8	23205.9	40067.5	39879.4	24592.9	31136.2	48618.3	42751.7	33250.3	33440	55035.7	42316.1	29096.5	23287.8	163676	80858.4	54948.8	134272	65674.9	150697	48943	66068.7	84186	94452.4	68685.6	47915.5	41345.2	62498.8	87274.5	6.24709e+06	66773.2	78783.8	1.2837e+06	97572.2	102140	47637.2	103561
P04220	Ig mu heavy chain disease protein	MUCB_HUMAN	9177.77	4.92399e+06	20001.8	7477.67	33944.3	58509.9	11153.3	49765	5245.9	14821	21158.3	35610.8	19132.9	19138.7	12584.2	40828.6	56210.9	61896.1	4950.62	11697.3	31965.5	657024	36505.7	6803.44	80462.7	1.45497e+06	867667	13307.8	942153	10779.7	9192.27	31644.7	768613	934515	9115.08	2.18622e+06	95499.6	3275472	11189.9	1.51087e+06	1.46629e+06	1.73604e+06	11697067	5.30087e+06	2.27156e+06	6.66059e+06	2.36947e+06
P02144	Myoglobin	MYG_HUMAN	Filtered	Filtered	Filtered	Filtered	Filtered	Filtered	Filtered	Filtered	Filtered	Filtered	Filtered	Filtered	Filtered	Filtered	Filtered	Filtered	Filtered	Filtered	Filtered	Filtered	Filtered	Filtered	Filtered	Filtered	Filtered	Filtered	Filtered	Filtered	Filtered	Filtered	Filtered	Filtered	Filtered	Filtered	Filtered	Filtered	Filtered	3521.13	3104.75	Filtered	Filtered	Filtered	Filtered	Filtered	Filtered	Filtered	Filtered
Q13508	Ecto-ADP-ribosyltransferase 3	NAR3_HUMAN	4048.91	2054.53	8440.57	Filtered	Filtered	Filtered	4776.05	4295.41	Filtered	2520.7	Filtered	8066.72	Filtered	Filtered	2580.78	7231.38	5086.06	5105.3	1492.51	4638.56	10863.8	2973.94	3978.75	Filtered	Filtered	7299.05	Filtered	Filtered	Filtered	5110.03	9453.24	Filtered	Filtered	7770.01	7097.25	3904.65	681.6	3431.38	Filtered	Filtered	2296.44	Filtered	Filtered	Filtered	4414.27	4925.85	Filtered
P13591	Neural cell adhesion molecule 1	NCAM1_HUMAN	29699.6	28953	26817.9	28619.4	33232.1	32703.5	19010.5	27278.7	25637.2	27414	21580.9	17421.2	26946.3	33992.7	33458.5	27091.5	17339.4	35639.9	13313.9	23492.7	37836.7	29963.8	37151.1	25399.7	15082.9	16731.3	18428.9	42162	18538.8	27334.2	30775	30060.8	28958.5	33174.6	16239.9	28657.4	22705.9	12555.6	31557.9	71620.3	25286.2	27904.5	Filtered	41424.6	49359.9	39229.6	33047.4
O15394	Neural cell adhesion molecule 2	NCAM2_HUMAN	6583.15	Filtered	Filtered	Filtered	5767.33	Filtered	5034.65	Filtered	Filtered	Filtered	4440.44	7546.49	Filtered	4963.42	Filtered	Filtered	7093.51	8051.01	Filtered	Filtered	Filtered	Filtered	Filtered	5117.47	Filtered	9905.45	Filtered	Filtered	3497.3	4994.42	Filtered	5376.92	3789.09	Filtered	Filtered	Filtered	Filtered	Filtered	Filtered	Filtered	Filtered	Filtered	Filtered	Filtered	Filtered	Filtered	Filtered
P15531;P22392	Nucleoside diphosphate kinase A;Nucleoside diphosphate kinase B	NDKA_HUMAN;NDKB_HUMAN	Filtered	Filtered	Filtered	Filtered	Filtered	Filtered	Filtered	Filtered	Filtered	Filtered	13744.2	807.505	Filtered	Filtered	Filtered	Filtered	Filtered	Filtered	Filtered	Filtered	Filtered	Filtered	Filtered	Filtered	Filtered	Filtered	Filtered	Filtered	Filtered	Filtered	Filtered	Filtered	Filtered	Filtered	Filtered	Filtered	Filtered	Filtered	Filtered	Filtered	Filtered	Filtered	Filtered	Filtered	Filtered	Filtered	Filtered
Q7Z3B1	Neuronal growth regulator 1	NEGR1_HUMAN	448.304	Filtered	Filtered	Filtered	Filtered	Filtered	711.603	298.596	Filtered	Filtered	365.516	Filtered	Filtered	Filtered	562.556	Filtered	349.713	515.32	Filtered	Filtered	Filtered	1597.68	Filtered	Filtered	Filtered	Filtered	920.929	1579.4	Filtered	Filtered	Filtered	Filtered	Filtered	Filtered	Filtered	Filtered	Filtered	Filtered	Filtered	Filtered	Filtered	Filtered	Filtered	4172.87	Filtered	Filtered	Filtered
Q92859	Neogenin	NEO1_HUMAN	5772.1	6119.23	17869.8	4760.27	3683.17	11009.9	3646.4	5136.22	1705.89	5957.27	3031.33	5726.05	1594.75	9857.62	5262.84	19872.1	5835.51	6777.23	3820.63	3420.39	3523.52	5417.99	5160.86	4985.94	13014.6	5412.88	7903.42	7844.01	3598.59	13386.5	7391.28	5956.69	8245.82	7361.31	4075	3822.46	Filtered	3234.44	2784.29	15854.3	Filtered	5488.78	Filtered	7795.9	28554.1	11835.6	4574.64
P80188	Neutrophil gelatinase-associated lipocalin	NGAL_HUMAN	Filtered	22298.6	53868.3	104047	33990.3	Filtered	138235	9570.1	4059.12	92077.8	149630	42522.9	Filtered	Filtered	37714.6	92456.8	121261	38110.3	Filtered	79422.2	89209.1	Filtered	108139	105087	Filtered	48836.7	10605.5	2456.36	14491.7	27903.8	17732.6	Filtered	59494.9	7841.8	2532.44	Filtered	31977.5	12546.2	Filtered	Filtered	Filtered	Filtered	Filtered	Filtered	Filtered	32657.4	31689.9
P14543	Nidogen-1	NID1_HUMAN	5149.64	5504.79	3060.06	1963.75	3776.25	Filtered	3189.95	2972.13	2031.78	3679.11	1787.64	5047.09	2507.13	3103.45	3244.57	3764.27	Filtered	Filtered	4643.69	4535.86	Filtered	4300.62	3764.48	3360.81	1345.62	5145.12	239.797	Filtered	5090.79	Filtered	Filtered	Filtered	Filtered	Filtered	792.584	6389.28	Filtered	Filtered	Filtered	Filtered	Filtered	Filtered	Filtered	Filtered	Filtered	Filtered	Filtered
Q99784	Noelin	NOE1_HUMAN	32285.6	35584.3	31134.5	23293.3	22771.3	34926.1	30138.8	28334.5	32292.1	38558.6	8708.58	25998	30286.5	25647.7	28119.2	17402.1	36415.9	26777.3	29440.9	26626.6	20094.3	34828	36167.1	21737.3	51883.2	42883.9	26395.5	17219	19755.8	21105.2	14411.6	16241.3	21050.8	20477	14464	21730.1	23510.6	18297.4	16732.7	60591.2	30543.8	30609.9	Filtered	30305.7	31510.9	38115.2	29738.1
P46531	Neurogenic locus notch homolog protein 1	NOTC1_HUMAN	Filtered	Filtered	Filtered	Filtered	Filtered	Filtered	Filtered	Filtered	Filtered	Filtered	Filtered	Filtered	Filtered	Filtered	Filtered	Filtered	Filtered	Filtered	Filtered	Filtered	Filtered	Filtered	Filtered	Filtered	Filtered	Filtered	Filtered	2887.97	1060.89	3665.8	Filtered	Filtered	Filtered	Filtered	Filtered	Filtered	Filtered	Filtered	Filtered	12402.5	Filtered	Filtered	Filtered	Filtered	Filtered	Filtered	Filtered
Q04721	Neurogenic locus notch homolog protein 2	NOTC2_HUMAN	Filtered	Filtered	Filtered	Filtered	Filtered	Filtered	Filtered	Filtered	Filtered	Filtered	Filtered	Filtered	Filtered	Filtered	Filtered	Filtered	Filtered	Filtered	Filtered	Filtered	Filtered	Filtered	Filtered	Filtered	Filtered	Filtered	Filtered	13394.2	6016.45	12510.3	Filtered	Filtered	Filtered	Filtered	Filtered	Filtered	Filtered	Filtered	Filtered	29700.8	Filtered	Filtered	47277.3	Filtered	Filtered	Filtered	Filtered
Q9UM47	Neurogenic locus notch homolog protein 3	NOTC3_HUMAN	Filtered	Filtered	Filtered	Filtered	Filtered	Filtered	Filtered	Filtered	Filtered	Filtered	Filtered	Filtered	Filtered	Filtered	Filtered	Filtered	Filtered	Filtered	Filtered	Filtered	Filtered	Filtered	Filtered	Filtered	Filtered	Filtered	619.955	5399.42	Filtered	Filtered	Filtered	Filtered	Filtered	Filtered	Filtered	Filtered	Filtered	Filtered	Filtered	29992.5	Filtered	Filtered	Filtered	Filtered	Filtered	Filtered	Filtered
O14786	Neuropilin-1	NRP1_HUMAN	19866.3	11482.7	12501.7	8088.33	8511.78	18579.9	11235.6	10435.5	12316.4	13078.5	6503.26	14714.3	18078.7	11682	9899.79	10710.8	16183.5	18653.6	21432.2	14987	19065.2	19359.3	20105.1	8699.16	43837.7	21354.1	24797.3	15196.5	19673.7	11184.5	17430.1	22250	26079	22755.9	14176.2	14772.6	8842.46	24523.7	16969.2	Filtered	9714.78	16716.5	Filtered	21662.7	16988.9	19600.8	24968.9
Q02818	Nucleobindin-1	NUCB1_HUMAN	Filtered	Filtered	Filtered	Filtered	Filtered	Filtered	Filtered	384.323	3050.14	Filtered	Filtered	Filtered	506.441	Filtered	Filtered	590.694	Filtered	Filtered	Filtered	8445.04	Filtered	Filtered	Filtered	Filtered	Filtered	Filtered	1146.39	Filtered	1290.99	Filtered	2920.64	531.711	865.68	2472.8	Filtered	1172.96	Filtered	Filtered	Filtered	Filtered	1158.84	Filtered	Filtered	1412.94	Filtered	Filtered	Filtered
Q13093	Platelet-activating factor acetylhydrolase	PAFA_HUMAN	1998.16	Filtered	Filtered	Filtered	1530.87	Filtered	Filtered	Filtered	Filtered	Filtered	Filtered	Filtered	Filtered	Filtered	3192.78	Filtered	Filtered	Filtered	Filtered	Filtered	Filtered	Filtered	8028.32	Filtered	15714.3	Filtered	Filtered	Filtered	186.228	Filtered	677.533	Filtered	Filtered	Filtered	Filtered	Filtered	Filtered	Filtered	Filtered	Filtered	Filtered	Filtered	Filtered	Filtered	Filtered	Filtered	Filtered
Q99497	Protein DJ-1	PARK7_HUMAN	6579.04	6151.91	Filtered	Filtered	Filtered	Filtered	4862.17	1219.06	3428.28	Filtered	14225.2	1819.46	7950.76	Filtered	2416.94	Filtered	Filtered	Filtered	Filtered	11602.2	Filtered	Filtered	Filtered	Filtered	Filtered	7721.5	2289.13	Filtered	15459.2	2996.1	8915.96	7442.58	964.375	Filtered	6751.06	10930.7	18478.2	15047	5658.73	69881.8	13872.9	22745.2	23845.9	11294.6	8973.72	5173.56	13119.8
Q15113	Procollagen C-endopeptidase enhancer 1	PCOC1_HUMAN	13527.8	12167.4	8659.92	11386.6	6077.14	2597.92	8888.57	9637.02	6335.92	13540.5	10108.2	8117.81	12377.3	11944.2	7141.15	9210.38	12272.4	9142.52	4881.43	7920.02	Filtered	10168.8	8801.17	13277.8	Filtered	13476.3	11696.1	29029.7	17929.2	45996.3	13976.2	7847.88	20921.4	30200.3	15542.3	11189	9298.12	4706.78	6529.51	Filtered	12356.4	12302.2	Filtered	19964.6	31723.8	9492.38	26833.8
P04085	Platelet-derived growth factor subunit A	PDGFA_HUMAN	Filtered	Filtered	Filtered	Filtered	Filtered	Filtered	Filtered	1920.15	1504.41	Filtered	Filtered	829.616	1167.1	Filtered	866.836	Filtered	242.21	Filtered	Filtered	1914.45	Filtered	2366.16	2287.51	Filtered	Filtered	258.031	7307.32	3254.67	471.392	4707.2	7934.66	9120.51	6744.49	10915.1	3863.21	3753.95	4845.82	3365.69	3532.41	Filtered	Filtered	12646.2	Filtered	Filtered	Filtered	Filtered	2664.48
P30101	Protein disulfide-isomerase A3	PDIA3_HUMAN	Filtered	Filtered	Filtered	Filtered	Filtered	Filtered	Filtered	Filtered	Filtered	Filtered	3233.4	1648.44	Filtered	Filtered	Filtered	Filtered	645.592	Filtered	Filtered	Filtered	Filtered	Filtered	Filtered	Filtered	Filtered	1344.54	Filtered	Filtered	Filtered	Filtered	566.33	Filtered	196.253	Filtered	Filtered	Filtered	Filtered	Filtered	Filtered	Filtered	Filtered	Filtered	Filtered	Filtered	Filtered	Filtered	Filtered
O00151	PDZ and LIM domain protein 1	PDLI1_HUMAN	6254.8	4975.07	5631.68	Filtered	3064.61	Filtered	4958.73	Filtered	3213.42	Filtered	Filtered	6797.94	2562.53	4322.3	5223.45	Filtered	Filtered	Filtered	Filtered	Filtered	Filtered	Filtered	Filtered	Filtered	Filtered	9131.71	3784.98	11661.5	36537.5	15152.5	16755.2	15954.4	2687.81	3524.76	8558.49	11727.6	28695.4	17257.5	10909	Filtered	8619.8	3281.87	Filtered	Filtered	Filtered	Filtered	6457.57
P30086	Phosphatidylethanolamine-binding protein 1	PEBP1_HUMAN	8802.96	13653.5	9012.36	8913.22	12214.3	Filtered	8499.76	6634.25	6079.16	3051.6	13197.6	9020.99	17216.9	16241.1	9721.48	16797.8	8424.81	11303.6	16595.8	14774.4	Filtered	Filtered	13556.6	6892.1	43244.5	6758.92	13992.7	19444.8	27696.7	18868.9	11997.5	17778.9	10055.6	12460.3	3510.06	8825.09	9198.09	5896.72	7467.67	Filtered	5789.91	29799.2	80330.5	12488.6	7413.79	5600.94	17327.2
Q96S96	Phosphatidylethanolamine-binding protein 4	PEBP4_HUMAN	9539.53	Filtered	17101.7	Filtered	Filtered	25667.4	37208.2	12927.5	34574	Filtered	Filtered	29490.5	Filtered	28104.9	61125.5	Filtered	20211.8	Filtered	10591.2	21682.9	Filtered	Filtered	Filtered	42990.1	Filtered	6261.47	Filtered	12655.8	5267.37	6993.95	Filtered	37615.6	Filtered	27521.1	17681.6	7200.56	Filtered	21832.2	40918.7	Filtered	Filtered	Filtered	4858.33	Filtered	Filtered	Filtered	Filtered
P36955	Pigment epithelium-derived factor	PEDF_HUMAN	796025	648817	434121	355430	449166	560716	605370	494403	521516	580967	356435	501625	554706	426660	451827	576608	457594	420312	430209	486726	523770	428834	483962	460445	1.06974e+06	843762	270570	415332	281386	698443	276851	470022	385773	254350	370892	417495	211396	269361	201737	2.07387e+06	221402	293495	422289	214665	592870	346261	467920
P12955	Xaa-Pro dipeptidase	PEPD_HUMAN	16011	13737.7	16059.6	12013.5	18190.6	20685.2	24466.4	18324.8	21102.9	14819	14284.6	22315	16228.6	21467.1	17246.8	17608	21682.2	15505.6	15591	15304.8	17403.7	18391.8	15009.6	14341.3	40661.3	28267.1	10449.4	30854.2	33233.4	43800.7	20985.1	18378	18673.5	13349	22109.8	32648.9	20473.1	23219	35813.2	67374.4	28081.4	6757.05	231953	12808.1	34695.1	20232.3	7601
P05164	Myeloperoxidase	PERM_HUMAN	920.83	5893.11	2172.04	Filtered	3526.98	Filtered	2673.03	3297.01	Filtered	2176.54	4874.82	3662.48	Filtered	533.707	1760.75	Filtered	Filtered	751.226	Filtered	Filtered	Filtered	Filtered	Filtered	Filtered	Filtered	2728.12	17128	12232.3	23219	4018.39	10567.8	18476.8	8442.48	31809.5	8779.69	11005	14152.6	3531.07	2709.31	53496.6	7525.17	16632.2	Filtered	4855.8	8189.98	3819.49	17595.8
P10720;P02776	Platelet factor 4 variant;Platelet factor 4	PF4V_HUMAN;PLF4_HUMAN	137146	169915	143330	197199	268048	118051	196699	270657	132395	144466	183479	144091	124710	106517	128548	178824	52008.8	68049.5	218084	164538	113604	104457	185082	76117.1	Filtered	172802	647429	126622	251438	188238	329511	307432	312273	682582	340810	379713	305137	239060	54073.5	123444	129920	229355	262925	152927	145512	148122	269535
P98160	Basement membrane-specific heparan sulfate proteoglycan core protein	PGBM_HUMAN	Filtered	Filtered	4752.57	5148.62	3750.97	Filtered	1543.46	3020.37	Filtered	Filtered	Filtered	4546.82	2364.94	2241.97	3181.46	2899.09	3480.31	Filtered	Filtered	4100.65	2941.25	2213.65	Filtered	2954.91	Filtered	6110.06	3962.96	4675.93	4097.06	5020.16	5839.59	3631.91	3645.3	6467.38	Filtered	Filtered	Filtered	905.096	Filtered	Filtered	11818.8	5289.8	Filtered	7150.02	9878.48	6890.32	5569.36
P00558	Phosphoglycerate kinase 1	PGK1_HUMAN	2482.37	Filtered	Filtered	Filtered	1449.28	Filtered	Filtered	2812.88	Filtered	Filtered	6975.26	2845.35	Filtered	Filtered	1728.11	Filtered	Filtered	Filtered	7792.3	Filtered	Filtered	Filtered	Filtered	Filtered	Filtered	5642.3	Filtered	7050.8	1943.81	Filtered	Filtered	Filtered	289.294	Filtered	Filtered	922.296	1391	Filtered	Filtered	Filtered	Filtered	3519.05	Filtered	Filtered	4402.26	Filtered	Filtered
Q96PD5	N-acetylmuramoyl-L-alanine amidase	PGRP2_HUMAN	19475.4	33470.9	19735.3	17063	19403.1	8661.17	14783.9	19052.2	9565.37	20708.3	24781.6	20114.9	17978.3	28499.2	14653	10270.2	11234.9	10602.4	15301.3	8256.44	12392	11797.6	10004.3	17674.8	16344.3	24161.1	12251.4	16470.9	23149.9	76913.8	5969.47	6113.5	16033.8	7959.51	12306.4	34775.1	10275.8	3556.84	4276.46	52010.2	5837.54	10263	7298.75	12527.4	32417.5	21281.4	34914
P80108	Phosphatidylinositol-glycan-specific phospholipase D	PHLD_HUMAN	30029.8	21025.7	21814.8	19697.7	22439.4	26510.8	28514.3	19971.1	13144.1	21433	26370.9	25605	27691.5	12461.1	24181.7	35476.3	22613.6	38193.7	45760.9	27616.3	36490.6	34003.2	23816.2	20800.1	101356	34348.6	15701.2	21097.6	10179.6	13208.1	12259.1	12998.2	27258	30221.6	21146.7	19424.2	12678	7215.28	6263.04	41030.9	13943.8	21664	92649	15306.9	33160.1	13551.3	36221.4
Q6UXB8	Peptidase inhibitor 16	PI16_HUMAN	31085.4	35158.2	15376.8	39042.6	24443.2	55999.7	29448.9	26627.4	25247.7	32820.6	10238.5	17914.9	23496.1	20338.1	14737.8	30561.3	56878.6	51992.8	22050.2	37607	40181.2	31657.1	38819	30645.1	Filtered	74665.8	21655	48768.4	41622.7	62615.2	24785.5	37893	45848.9	55194.2	38785.3	48987.7	20753.1	70308.2	43004	216701	95949.2	57797.2	Filtered	81126.7	96802.2	39468.8	125658
P01833	Polymeric immunoglobulin receptor	PIGR_HUMAN	Filtered	Filtered	22273.8	Filtered	13652.8	25228.5	18753.8	16641.4	9351.5	Filtered	19183.7	20909.7	26442.8	15942.7	Filtered	25639.4	10769.6	5735.94	13266.6	Filtered	Filtered	22910.2	17112.1	14087.1	54230.4	16374.3	19260.6	Filtered	13817.9	Filtered	Filtered	22963.1	Filtered	63500.5	14415	11582	23251.4	25272.7	47377.7	Filtered	34074.1	40047.1	Filtered	29677.8	21115.5	25188.8	35104.6
Q86WI1	Fibrocystin-L	PKHL1_HUMAN	Filtered	Filtered	Filtered	Filtered	Filtered	Filtered	Filtered	Filtered	Filtered	Filtered	Filtered	Filtered	Filtered	Filtered	30243.2	Filtered	Filtered	Filtered	Filtered	Filtered	12631.9	Filtered	Filtered	Filtered	Filtered	13474.7	Filtered	3428.31	Filtered	2232.71	Filtered	Filtered	3334	Filtered	Filtered	Filtered	Filtered	Filtered	12350.9	Filtered	5463.86	Filtered	5107.65	Filtered	Filtered	Filtered	Filtered
P14923	Junction plakoglobin	PLAK_HUMAN	Filtered	Filtered	Filtered	Filtered	Filtered	Filtered	Filtered	Filtered	Filtered	Filtered	Filtered	Filtered	Filtered	Filtered	Filtered	Filtered	Filtered	Filtered	Filtered	1417.29	Filtered	Filtered	13924.9	Filtered	Filtered	Filtered	Filtered	Filtered	20870.6	2951.8	Filtered	Filtered	Filtered	10993.5	Filtered	Filtered	Filtered	Filtered	Filtered	Filtered	7614.37	Filtered	Filtered	Filtered	Filtered	Filtered	Filtered
P00747	Plasminogen	PLMN_HUMAN	1.71259e+06	1.52131e+06	1272109	1.23128e+06	1033713	991859	1.15069e+06	1.18394e+06	976616	1285381	1.33797e+06	1.50737e+06	1.24757e+06	1.51868e+06	1.69072e+06	1.07722e+06	1.03706e+06	1.31583e+06	1.15806e+06	1.0645e+06	952063	1180895	1.6537e+06	1.10286e+06	2934659	1481735	159433	419283	388508	761430	638881	457840	385570	259089	608713	990173	508708	656711	319845	916555	625475	863848	2388347	267247	966742	1.23099e+06	514389
P13796	Plastin-2	PLSL_HUMAN	1.32348e+06	4080.85	4942.72	5132.95	93261.2	Filtered	2622.64	704722	2055.03	6648.95	5532.37	404270	5073.36	4022.62	935859	4219.92	563722	311844	3347.97	3281.42	1.37891e+06	1075.84	2328.93	1.49002e+06	Filtered	4246.84	3891.21	Filtered	3009.04	9689.96	3038.54	4183.33	11257	12554.1	3746	3499.82	Filtered	Filtered	2071869	Filtered	4658.83	Filtered	Filtered	Filtered	367749	610434	Filtered
P55058	Phospholipid transfer protein	PLTP_HUMAN	15305.6	7794.77	14119.9	11428.8	12229.9	5631.23	4393.71	19862	4399.94	7672.29	15537.1	21250.5	11131.8	16175.2	9026.26	7227.42	16716.2	19704.6	13561.7	12230.6	Filtered	7718.38	17774.6	13273	Filtered	19691	9274.88	Filtered	9733.18	5483.32	4084.3	Filtered	10124.8	6530.04	14256.2	8758.7	Filtered	199.192	Filtered	Filtered	Filtered	Filtered	Filtered	2340.66	9468.97	19369.5	Filtered
P27169	Serum paraoxonase/arylesterase 1	PON1_HUMAN	172991	71867.5	62833.4	72353.2	85397.8	36706.5	48715.2	122811	44949.6	91531.3	102791	113940	100955	99226	75541.1	64773.8	113210	152607	81825.2	101224	119325	144782	109043	95230.2	277858	163995	28648.5	19019.7	21453.7	32951.5	31493.1	25749.5	39001.2	19839.7	57298.3	47434.6	23349.1	15419.3	12646.1	59108.9	22062.5	195072	141838	34760.8	34318.7	34235.5	51271.9
Q15166	Serum paraoxonase/lactonase 3	PON3_HUMAN	95197.6	13456.2	18860.7	11927.3	47509.1	Filtered	10762.1	51449.6	8519.34	10498.1	38109.2	43251.1	35457.6	41207.8	44700.1	23692.7	39841.8	41183.2	25992.5	24995	51555.8	71180.4	44698.1	51438	170628	56519.9	Filtered	Filtered	Filtered	Filtered	6525.85	Filtered	4159.25	Filtered	Filtered	13429.9	Filtered	10752.6	3662.09	Filtered	Filtered	Filtered	Filtered	Filtered	Filtered	Filtered	Filtered
P62937	Peptidyl-prolyl cis-trans isomerase A	PPIA_HUMAN	8247.49	3208.36	6292.9	Filtered	4658.98	9573.07	4318.86	1767.18	3992.76	8257.6	17113.2	5912.13	4925.63	3739.21	3760.56	3793.08	Filtered	Filtered	870.742	1004.34	Filtered	Filtered	Filtered	Filtered	Filtered	12139.9	2827.24	4771.37	11950.8	7456.56	9048.02	7845.03	927.098	Filtered	5774.41	9626.7	8150.61	6765.74	6016.16	Filtered	8891.42	14204.7	Filtered	7816.14	5275.14	4488.82	2156.03
P23284	Peptidyl-prolyl cis-trans isomerase B	PPIB_HUMAN	10714.3	6975.52	12700.6	Filtered	8821.35	Filtered	7466.15	5710.43	12343	Filtered	9328.02	8996.09	Filtered	Filtered	9459.03	Filtered	Filtered	4650.17	Filtered	3987.55	Filtered	Filtered	Filtered	Filtered	Filtered	13270.7	10649	23960.5	18602.4	32992.3	13313.5	22432.3	9180.12	9780.31	18908.7	8640.92	24238.2	7696.12	12236.6	57389.3	15155.4	24016.3	Filtered	Filtered	Filtered	Filtered	15150.2
P02812	Basic salivary proline-rich protein 2	PRB2_HUMAN	Filtered	Filtered	Filtered	Filtered	Filtered	Filtered	Filtered	Filtered	Filtered	Filtered	Filtered	Filtered	Filtered	Filtered	Filtered	Filtered	Filtered	Filtered	Filtered	Filtered	Filtered	Filtered	Filtered	Filtered	Filtered	Filtered	Filtered	2357.8	Filtered	Filtered	Filtered	Filtered	Filtered	Filtered	Filtered	Filtered	Filtered	Filtered	Filtered	146881	7317.6	Filtered	Filtered	Filtered	Filtered	Filtered	Filtered
P32119	Peroxiredoxin-2	PRDX2_HUMAN	21556.3	11333.2	12513.3	15225.3	4659.66	15102.7	5278.86	8734.24	Filtered	19504.1	21924.9	16745.4	6168.3	Filtered	6034.16	5864.43	Filtered	12500.8	9011.97	7872.61	3640.82	Filtered	2037.79	4404.61	Filtered	5488.6	14836.3	4059.51	12922.8	19127.2	7122.07	6209.07	7635.55	4901.45	7396.83	12675.8	6761.13	2305.93	7504.93	35383	5867.6	32562.4	9123.84	21411.1	13496.7	14485.5	19153.5
P30041	Peroxiredoxin-6	PRDX6_HUMAN	Filtered	Filtered	Filtered	Filtered	Filtered	Filtered	Filtered	Filtered	Filtered	Filtered	3334.33	Filtered	Filtered	Filtered	Filtered	Filtered	Filtered	Filtered	Filtered	Filtered	Filtered	Filtered	Filtered	Filtered	Filtered	Filtered	Filtered	Filtered	Filtered	Filtered	Filtered	Filtered	Filtered	Filtered	Filtered	Filtered	Filtered	Filtered	Filtered	Filtered	Filtered	Filtered	Filtered	Filtered	Filtered	Filtered	Filtered
P13727	Bone marrow proteoglycan	PRG2_HUMAN	Filtered	Filtered	Filtered	Filtered	Filtered	Filtered	Filtered	Filtered	Filtered	Filtered	Filtered	Filtered	Filtered	Filtered	Filtered	Filtered	Filtered	Filtered	Filtered	Filtered	Filtered	Filtered	Filtered	Filtered	Filtered	Filtered	Filtered	52754.3	Filtered	Filtered	Filtered	Filtered	Filtered	Filtered	Filtered	Filtered	Filtered	Filtered	Filtered	90940.5	Filtered	Filtered	112896	Filtered	Filtered	Filtered	Filtered
Q92954	Proteoglycan 4	PRG4_HUMAN	6310.41	15694.7	6932.92	9990.73	7246.27	2335.61	7133.05	7816.51	6144.01	7765.68	13576	11898.6	7682.97	5847.21	10176.2	7684.1	4282.78	9205.82	5753.32	5423.18	Filtered	5061.08	4098.57	15648.9	23132.5	3696.99	48703.9	24926.7	29014.3	28792.5	19602.7	17968.5	23144.6	83748.9	43316	22566.7	30488.9	7142.19	9563.73	58567.2	19153.9	37482.2	293492	29320	28135.2	19965.7	50146.5
P07737	Profilin-1	PROF1_HUMAN	20051.7	12036.5	10800.7	6165.07	10160.7	Filtered	3875.18	13207.7	1166.83	11345.1	23268.4	14636.5	4632.22	9560.01	8694.26	23809	11876.9	Filtered	Filtered	2376.32	Filtered	4115.5	Filtered	969.221	Filtered	11835.7	14103.5	22858.3	32085.5	38568.8	20493.4	37360	6331.55	13019.1	16194.9	20701.4	15418.9	10224.1	8498.28	242160	19405.4	11266.5	Filtered	7642.1	19128.6	13705.2	23565.2
P27918	Properdin	PROP_HUMAN	88078.3	93561.3	100091	206869	99547.5	84183.8	87361.5	58921.5	63005.3	206669	35503.1	47221	125144	97590.5	91798.5	69759.3	51604	103779	80981	108606	350888	64230	71793.6	144347	213484	327234	339978	694095	446664	1.19009e+06	216379	181747	148417	421989	209731	285804	126129	173203	215272	1.05483e+06	192045	314773	1.78427e+06	265493	85982.9	118358	256333
P07225	Vitamin K-dependent protein S	PROS_HUMAN	157448	132588	106080	65542.3	81722.5	109888	86837.3	87218.2	101171	91253.5	131298	129878	91403.2	104076	82070.8	92306.7	91495.2	90042.5	111222	97823	76940.7	109431	119157	124503	64713.4	169099	66402.6	27606	43055.4	46565.1	9335.02	6346.46	13544.7	25266.5	14843.1	40631	29058.7	24391.6	16162.2	48020.5	37638.4	26658.4	Filtered	37110.6	55315.3	49976.7	40062.9
P22891	Vitamin K-dependent protein Z	PROZ_HUMAN	10546.5	883.023	2613.87	5873.85	3592.24	Filtered	6908.39	6358.83	4048.62	6437.31	3474.92	9157.8	984.69	6697.49	4338.56	8164.56	Filtered	2657.42	Filtered	2356.15	Filtered	4858.14	4488.96	Filtered	Filtered	9923.91	2353.59	3443.11	3966.15	5817	1687.61	1173.84	2471.32	Filtered	Filtered	3186.14	Filtered	2722.75	Filtered	Filtered	2363.2	Filtered	Filtered	Filtered	3382.48	3749.84	Filtered
P25786	Proteasome subunit alpha type-1	PSA1_HUMAN	12491.1	17882.4	20734.1	Filtered	Filtered	Filtered	8995.03	46092.9	12177.1	Filtered	3924.39	4933.71	Filtered	Filtered	26379.1	5321.6	Filtered	12274.3	23593.2	Filtered	Filtered	Filtered	18641.8	Filtered	Filtered	17039.3	Filtered	5566.04	3693.13	Filtered	Filtered	Filtered	5609.22	Filtered	4520.81	Filtered	2470.21	22212.4	Filtered	Filtered	18325.1	2175.31	Filtered	5533.11	23345.1	21031.3	1528.14
P25788	Proteasome subunit alpha type-3	PSA3_HUMAN	Filtered	1807.85	Filtered	Filtered	Filtered	Filtered	Filtered	729.555	Filtered	Filtered	Filtered	540.053	Filtered	407.138	Filtered	Filtered	Filtered	Filtered	Filtered	Filtered	Filtered	Filtered	Filtered	Filtered	Filtered	3746.02	Filtered	852.92	1841.92	Filtered	Filtered	Filtered	899.177	Filtered	Filtered	995.445	Filtered	18563.9	692.522	4856.89	2910.93	994.232	Filtered	3062.82	Filtered	Filtered	Filtered
P25789	Proteasome subunit alpha type-4	PSA4_HUMAN	Filtered	Filtered	Filtered	Filtered	Filtered	Filtered	Filtered	Filtered	Filtered	Filtered	16399.5	Filtered	Filtered	Filtered	Filtered	Filtered	Filtered	Filtered	Filtered	Filtered	Filtered	Filtered	Filtered	Filtered	Filtered	Filtered	Filtered	Filtered	5595.92	Filtered	Filtered	Filtered	656.097	Filtered	Filtered	Filtered	Filtered	Filtered	Filtered	7164.61	Filtered	Filtered	Filtered	Filtered	Filtered	Filtered	Filtered
P28066	Proteasome subunit alpha type-5	PSA5_HUMAN	4075.02	Filtered	Filtered	Filtered	3936.82	Filtered	Filtered	Filtered	Filtered	8904.29	5382.48	7010.76	4519.15	Filtered	Filtered	7853.08	Filtered	Filtered	Filtered	Filtered	Filtered	Filtered	4685.88	6073.71	6929.81	Filtered	8307.66	5017.37	8135.94	7702.8	Filtered	5647.62	6728.39	4900.44	Filtered	3765.95	Filtered	Filtered	1534.59	Filtered	9851.93	4799.21	Filtered	8001.77	4414.06	Filtered	Filtered
P60900	Proteasome subunit alpha type-6	PSA6_HUMAN	Filtered	Filtered	Filtered	Filtered	Filtered	Filtered	Filtered	Filtered	Filtered	Filtered	1551.67	7563.54	Filtered	Filtered	25710.3	Filtered	Filtered	Filtered	Filtered	Filtered	Filtered	Filtered	Filtered	Filtered	Filtered	Filtered	4973.46	Filtered	Filtered	Filtered	Filtered	Filtered	4767.01	13265.6	Filtered	Filtered	Filtered	54254.7	Filtered	Filtered	3131.95	6419.01	Filtered	Filtered	Filtered	Filtered	Filtered
O14818	Proteasome subunit alpha type-7	PSA7_HUMAN	Filtered	Filtered	Filtered	Filtered	Filtered	Filtered	Filtered	Filtered	Filtered	Filtered	Filtered	76280.1	Filtered	Filtered	Filtered	Filtered	Filtered	Filtered	Filtered	Filtered	Filtered	Filtered	Filtered	Filtered	Filtered	Filtered	Filtered	92.131	436.284	Filtered	Filtered	Filtered	Filtered	Filtered	Filtered	21732.5	8260.4	Filtered	Filtered	9257.58	13717.7	10015.1	Filtered	9469.07	3799.52	7487.17	Filtered
P28072	Proteasome subunit beta type-6	PSB6_HUMAN	Filtered	Filtered	Filtered	Filtered	Filtered	Filtered	Filtered	Filtered	Filtered	Filtered	Filtered	Filtered	Filtered	Filtered	Filtered	Filtered	Filtered	Filtered	Filtered	Filtered	Filtered	Filtered	Filtered	Filtered	Filtered	Filtered	Filtered	Filtered	1118.98	Filtered	Filtered	Filtered	671.696	Filtered	Filtered	Filtered	Filtered	Filtered	Filtered	Filtered	708.844	Filtered	Filtered	Filtered	Filtered	Filtered	Filtered
P41222	Prostaglandin-H2 D-isomerase	PTGDS_HUMAN	37788	4036.47	16361.8	Filtered	13357.8	19110.4	8684.34	11968	8744.66	16126.9	Filtered	5186.37	23662.3	7955.47	7605.69	10873.6	13175.7	19092.1	19984.9	16396	17186.8	5510.21	20311.8	5512.01	Filtered	34003.6	48573.7	105563	36551.6	70939.7	12786	23636	21190.1	55194.3	24363	30702.8	38181	15199.6	47471	Filtered	29683.6	37080.6	121837	45693.9	30817.2	10772.7	26851.3
Q13308	Inactive tyrosine-protein kinase 7	PTK7_HUMAN	2594.3	Filtered	Filtered	Filtered	2592.7	Filtered	2292.44	Filtered	Filtered	Filtered	Filtered	Filtered	Filtered	Filtered	1270.95	Filtered	Filtered	Filtered	Filtered	Filtered	Filtered	Filtered	Filtered	1790.81	Filtered	5002.28	Filtered	8544.95	8018.06	Filtered	5502.05	Filtered	Filtered	Filtered	4679.6	7323.15	Filtered	Filtered	Filtered	Filtered	5859.42	Filtered	Filtered	Filtered	7696.8	Filtered	6341.05
P08575	Receptor-type tyrosine-protein phosphatase C	PTPRC_HUMAN	Filtered	Filtered	Filtered	Filtered	Filtered	Filtered	Filtered	Filtered	Filtered	Filtered	Filtered	Filtered	Filtered	Filtered	Filtered	Filtered	Filtered	Filtered	Filtered	Filtered	Filtered	Filtered	Filtered	Filtered	Filtered	Filtered	Filtered	Filtered	Filtered	Filtered	Filtered	4079.71	Filtered	Filtered	Filtered	Filtered	Filtered	3038.58	4084.84	Filtered	Filtered	5678.58	Filtered	2144.81	4179.64	Filtered	Filtered
P23470	Receptor-type tyrosine-protein phosphatase gamma	PTPRG_HUMAN	6198.64	2175.92	4691.42	2826.96	2457.32	3673.61	4258.47	3634.31	3690.87	4484.57	2208.61	3136.21	4747.15	2535.81	2926.32	2930.17	6583.72	3765.97	3367.33	3989.52	3670.18	2382.19	3515.64	1204	Filtered	6875.11	11668.8	9923.19	10424.8	11281.4	7555.91	9260.13	5103.21	16107.1	5603.93	8314.64	7109.16	7141.19	7122.41	Filtered	10397.7	12238.2	Filtered	10842.4	13260.6	6223.24	7595.03
Q12913	Receptor-type tyrosine-protein phosphatase eta	PTPRJ_HUMAN	12193	15973.6	12671.9	8587.17	14912.5	13357	14105	11186.7	17889.4	12295.5	12383.4	12830.1	14217.2	9875.79	12969.6	11256.7	14467.8	13168.5	14093	10578.8	19642.3	12441.3	11938.4	11481.7	12194.3	25123.9	24340.1	27412.3	12957.1	26988.8	28331.6	16862.8	34010.2	25225.2	31916.3	21691.5	23548.3	23764.6	28513.9	20222.7	24040.6	19181.7	465830	20342.8	38763.1	20078.1	51196.1
P28827	Receptor-type tyrosine-protein phosphatase mu	PTPRM_HUMAN	5640.8	9421.17	8677.97	Filtered	5450.88	6477.82	7592.15	5507.48	Filtered	2011.7	1609.35	4816.57	9228.13	Filtered	4320.9	7296.92	2882.91	5328.81	6361.15	1840.52	Filtered	1866.87	2367.6	Filtered	Filtered	6752.55	15007.4	18312.9	12056.7	21058.4	8059.56	12253.8	8621.22	25403.5	13388.8	8896.62	18779.8	10247.3	23699.1	34432.4	27895.8	12493.6	67788.4	17785.5	20103.8	6511.48	10301.6
P15151	Poliovirus receptor	PVR_HUMAN	30249.2	48090.9	28727	26940.4	26063	28499.7	28594	35585.6	17751	33273.3	31101.6	31329.3	27199.9	21261	24450.9	29720.3	31874.5	39907.8	40548	43107.5	42516.1	25785.7	49462.7	34392.3	231738	34461.1	57147.4	30079.8	37960.7	32502.6	40670.5	31126.4	59070.9	43742.9	38896.4	34777	24898.7	20872.5	28556.1	160662	28816.4	47854.6	250308	36532.7	55969	27935.1	69951.5
Q15223	Poliovirus receptor-related protein 1	PVRL1_HUMAN	4395.97	Filtered	Filtered	Filtered	Filtered	Filtered	26142.6	Filtered	Filtered	Filtered	Filtered	Filtered	Filtered	Filtered	Filtered	Filtered	Filtered	Filtered	Filtered	Filtered	Filtered	Filtered	Filtered	Filtered	14592.4	4566.86	Filtered	Filtered	Filtered	Filtered	Filtered	Filtered	Filtered	Filtered	13779.7	Filtered	Filtered	Filtered	Filtered	Filtered	5809.78	5913.75	Filtered	7279.85	10440.8	8211.36	7963.03
Q6UX71	Plexin domain-containing protein 2	PXDC2_HUMAN	22024.9	2763.08	15033.9	31023.3	14825.2	13523	22297.2	12867.1	13998.2	16891.6	13626	16236.8	17463.3	20199	12502.8	17994	15422.2	21057.8	16876.6	10717.9	26966.1	16117.3	22041.2	14881.2	92335.5	25209.6	33935.1	29321.3	28710.6	42184.3	17839	25326.1	32823.5	33891.5	42757.6	23637.7	22583.2	23488.5	32077.9	125125	36112.6	46408.4	126098	29651.2	48090.2	55484.5	53739.3
P20742	Pregnancy zone protein	PZP_HUMAN	506169	78889.4	23559	47199.4	35876.4	15212.9	22029.4	6524.64	29773.7	11005.3	35624	4630.82	7749.88	21815.6	41264.7	390886	3893.76	94505	9928.45	32122.5	7548.18	31162.2	44242.4	39306	86448.9	77276.6	19612.9	13092.3	28354.3	12875	12449	33351.8	39702.8	1.40264e+06	3119.32	6373.76	31927.4	39970	40534	41306.6	67309.5	19088.2	17254.8	47466.2	9613.11	12029.1	42838.6
O00391	Sulfhydryl oxidase 1	QSOX1_HUMAN	16792.7	28693.5	13607.5	29041.1	13505.5	6560.61	8808.83	11117.7	7019.34	23060.4	19266.1	20959.4	12453.8	19194.9	11757.9	12602.5	11661.2	18571.4	13194.8	10685.1	10362.8	16483.5	15512.3	22712.3	43540.5	17280	17662.4	19974.5	10589.2	31555	19396.6	14387.1	20398	21168.5	22396.9	27966.4	16189.3	Filtered	14571.5	25227.3	6973.97	20821.8	56811	23559.5	37727.3	26083	41056.1
Q99969	Retinoic acid receptor responder protein 2	RARR2_HUMAN	Filtered	Filtered	Filtered	Filtered	Filtered	Filtered	Filtered	3036.63	Filtered	Filtered	1354.91	Filtered	Filtered	Filtered	Filtered	Filtered	Filtered	Filtered	Filtered	Filtered	Filtered	Filtered	Filtered	Filtered	Filtered	384.353	2674.02	4239.85	2469.94	4564.75	10521.5	4880.2	Filtered	3835.78	Filtered	1881.04	Filtered	Filtered	Filtered	Filtered	395875	3933.98	Filtered	3850.75	Filtered	Filtered	7054.89
P02753	Retinol-binding protein 4	RET4_HUMAN	153736	139548	91244.4	69358.2	88205.4	109583	121411	103378	51654.5	85963.2	98027.4	175026	107479	58419.4	109997	127446	49775.7	68886.1	75719.9	73790.9	70934.5	71457.8	95259.1	125403	39507.9	88392.1	68678.5	31939.9	37976.9	25478.9	64023.4	41579.9	72974.2	107393	64900.2	93582.7	55488.8	70215.2	55453.4	57266.8	57627.4	53713.2	1904.98	50282.4	58206.2	85140.4	85698.9
P62987;P62979;P0CG47;P0CG48	Ubiquitin-60S ribosomal protein L40;Ubiquitin-40S ribosomal protein S27a;Polyubiquitin-B;Polyubiquitin-C	RL40_HUMAN;RS27A_HUMAN;UBB_HUMAN;UBC_HUMAN	15156.7	6941.8	8022.62	Filtered	9428.27	Filtered	5505.86	8444.24	Filtered	9968.18	33250.4	9914.55	14543.1	Filtered	4595.41	Filtered	5536.74	8916.94	7783.84	7381.18	Filtered	Filtered	6093.49	5722.32	Filtered	9236.78	8404.25	Filtered	21588.4	5595.96	10302.6	9746.67	Filtered	Filtered	8441.32	11412.9	17154.7	9238.36	12986.9	40644.1	18944.1	31139.2	61603.7	7472.43	7943.66	Filtered	10153.1
P10153	Non-secretory ribonuclease	RNAS2_HUMAN	Filtered	26487.2	15051.5	Filtered	17215.3	23987.2	9768.43	26058.4	Filtered	48394	9781.05	6523.54	Filtered	7716.94	14360.4	Filtered	Filtered	21571.7	Filtered	Filtered	Filtered	Filtered	13153.3	Filtered	Filtered	11030.7	16228.3	23800.3	5133.76	Filtered	21460	20015.2	14899.1	41472.6	22571.5	12755.6	15601.9	17671.7	21419.4	Filtered	Filtered	15193.1	Filtered	Filtered	15610.5	Filtered	61199.5
O00584	Ribonuclease T2	RNT2_HUMAN	Filtered	Filtered	195.902	Filtered	Filtered	Filtered	Filtered	Filtered	Filtered	Filtered	Filtered	Filtered	Filtered	Filtered	Filtered	Filtered	Filtered	Filtered	Filtered	Filtered	Filtered	Filtered	Filtered	Filtered	Filtered	332.945	Filtered	Filtered	1300.51	Filtered	1201.5	Filtered	Filtered	Filtered	Filtered	1235.02	1095.43	1493.79	Filtered	Filtered	Filtered	Filtered	Filtered	Filtered	Filtered	Filtered	Filtered
Q8WZ75	Roundabout homolog 4	ROBO4_HUMAN	2718.53	Filtered	5563.6	Filtered	2932.6	Filtered	5245.14	4101.22	Filtered	Filtered	Filtered	Filtered	1154.59	1746.78	377.186	4030.78	3260.28	2516.04	4211.34	4353.15	Filtered	3197.01	2104.14	Filtered	Filtered	7363.03	2175.51	2805.78	1935.77	3421.26	Filtered	4030.3	21942	1192.83	2726.21	1668.61	2361.21	Filtered	Filtered	12758.6	2940.55	Filtered	Filtered	6586.19	29189	Filtered	3510.93
P08865	40S ribosomal protein SA	RSSA_HUMAN	Filtered	Filtered	Filtered	Filtered	Filtered	Filtered	Filtered	Filtered	Filtered	Filtered	14234	Filtered	Filtered	Filtered	Filtered	Filtered	Filtered	Filtered	Filtered	Filtered	Filtered	Filtered	Filtered	Filtered	Filtered	Filtered	Filtered	Filtered	10462.6	Filtered	Filtered	Filtered	Filtered	Filtered	Filtered	Filtered	Filtered	Filtered	Filtered	Filtered	Filtered	Filtered	Filtered	Filtered	Filtered	Filtered	Filtered
Q9NQC3	Reticulon-4	RTN4_HUMAN	Filtered	Filtered	8418.36	Filtered	Filtered	Filtered	4971.81	Filtered	Filtered	Filtered	15318.8	7731.47	Filtered	Filtered	Filtered	Filtered	Filtered	Filtered	Filtered	Filtered	Filtered	Filtered	Filtered	Filtered	Filtered	Filtered	Filtered	3758.58	16383.8	3978.43	13602.8	8179.31	Filtered	Filtered	7929.76	11126.5	12173.2	Filtered	Filtered	Filtered	Filtered	Filtered	Filtered	Filtered	Filtered	Filtered	Filtered
P05109	Protein S100-A8	S10A8_HUMAN	39617.3	68972.4	55993	Filtered	Filtered	174948	Filtered	Filtered	239757	5155.2	2776.12	32128.3	Filtered	156749	135370	Filtered	Filtered	Filtered	96756.6	150983	92126.7	Filtered	55257.4	107897	Filtered	116173	125968	50498	44501.4	58984.8	172181	77200.6	212111	93168.8	Filtered	5621.82	3120.37	182707	Filtered	170544	5133.23	8481.77	1902981	Filtered	Filtered	Filtered	290865
P06702	Protein S100-A9	S10A9_HUMAN	27104.3	45489.2	25091	Filtered	4904.15	14022.7	9293.73	11094.2	1689.12	26854.4	22753.7	15757.1	9662.15	11010	12304.2	7208.03	7967.8	9085.47	6661.96	15990.4	6699.51	6860.13	10262.7	7070.76	Filtered	15042.9	9670.32	33040.1	96801.1	32088.3	5945.84	27867.2	11167.2	8531.39	9693.31	37767.3	16770.1	7055.26	16474.3	290372	21080.2	55437	119521	17775	17844.6	18177.2	18201.2
P0DJI8	Serum amyloid A-1 protein	SAA1_HUMAN	1185.54	Filtered	1534.5	Filtered	Filtered	Filtered	2074.45	888.389	4055.92	Filtered	Filtered	1086.2	Filtered	Filtered	Filtered	1419.15	3664.83	Filtered	Filtered	4655.71	Filtered	1351.67	Filtered	507.274	Filtered	Filtered	Filtered	902.109	Filtered	Filtered	Filtered	Filtered	Filtered	Filtered	Filtered	Filtered	Filtered	Filtered	Filtered	Filtered	Filtered	27004.9	Filtered	28367.8	Filtered	Filtered	Filtered
P35542	Serum amyloid A-4 protein	SAA4_HUMAN	208237	156220	214440	75998	153794	120499	210585	249167	198255	91705.7	229943	148372	213538	147795	156853	218196	144818	159972	208556	225249	88689.5	388512	235943	164852	1.62911e+06	122324	55157.9	102982	44471.1	63831	46498.6	34494.3	65662.7	86903	99791.5	109090	165929	51065.6	30619.1	43825.3	29777.5	34996.1	298862	43085.7	28686.6	49049.8	61339.2
P02743	Serum amyloid P-component	SAMP_HUMAN	344721	1.54451e+06	524746	1.09635e+06	472202	2.21118e+06	371598	271984	599222	995633	855974	498646	559013	461950	674924	2.01823e+06	1.0128e+06	1.69057e+06	1894587	1.099e+06	1943823	1.32157e+06	1.16006e+06	1.09867e+06	1503345	223042	950738	813861	629538	341275	413682	491462	513311	576648	1.07135e+06	467382	488405	534838	554630	1.35346e+06	673074	776307	6747715	1054376	842752	676566	804526
Q13228	Selenium-binding protein 1	SBP1_HUMAN	5757.36	5859.27	Filtered	906.424	Filtered	Filtered	877.048	446.196	Filtered	Filtered	1600.84	1449.16	Filtered	Filtered	Filtered	Filtered	1168.7	Filtered	Filtered	Filtered	Filtered	10420.6	Filtered	Filtered	Filtered	8056.86	16224.1	13562.7	7148.77	18594	7763.33	8225.51	8671.38	9056.52	17788.2	8166.54	19179.7	9180.66	14083	48032.9	24760.2	35578.3	249696	17999.4	28858.5	7908.9	48878.5
P49908	Selenoprotein P	SEPP1_HUMAN	44390.9	22243.8	34586.5	50942.9	46593.3	52238.7	48407.6	46583.2	41444.1	51159	45792.6	57184.9	55459.6	29542.9	38549.7	39975.5	55058.8	54079.5	66155.4	62936	22233.1	32479	50928.9	26131.1	106020	21438.7	60136.5	19463.3	28641.2	36745	18105.8	24454.3	25277	98674.1	41636.1	22165.3	Filtered	16826.4	5872.25	26828.9	21564	65708	128786	39082.9	68292.5	50700.8	34957.7
Q12884	Seprase	SEPR_HUMAN	6082.04	Filtered	Filtered	Filtered	15268.9	Filtered	4105.87	8247.46	Filtered	Filtered	717.422	553.358	9973.49	Filtered	Filtered	Filtered	251.264	Filtered	Filtered	Filtered	Filtered	Filtered	Filtered	Filtered	Filtered	1752.95	7198.31	17111.5	8549.46	11876.9	4884.76	Filtered	2406.99	17650.3	5890.22	3536.71	3222.06	3734.98	5836.75	38827.7	4581.3	4956.48	Filtered	Filtered	6142.97	1513.37	Filtered
O75368	SH3 domain-binding glutamic acid-rich-like protein	SH3L1_HUMAN	15118	Filtered	Filtered	Filtered	Filtered	Filtered	Filtered	Filtered	Filtered	Filtered	Filtered	Filtered	Filtered	Filtered	4735.31	Filtered	Filtered	Filtered	Filtered	Filtered	Filtered	Filtered	Filtered	Filtered	Filtered	18122.8	Filtered	23011.5	62651.3	25615.7	26781.4	Filtered	Filtered	Filtered	24944.2	26076.8	27164.7	21828.9	19339.7	67773.6	24887.5	35500.3	26041.4	11536.3	8807.13	6687.03	22240.7
Q9H299	SH3 domain-binding glutamic acid-rich-like protein 3	SH3L3_HUMAN	7918.92	3562.46	7088.94	3419.83	10338.7	6456.92	10996.5	6894.85	7619.64	10206.7	3856.3	11552	10402.5	7889.66	10335.6	Filtered	Filtered	Filtered	Filtered	Filtered	Filtered	Filtered	1461.45	Filtered	Filtered	3080.36	Filtered	Filtered	4414.29	Filtered	12348.2	8407.56	Filtered	Filtered	9844.76	17705.8	8897.51	16215.9	15452.9	Filtered	5934.42	3577.2	Filtered	Filtered	Filtered	Filtered	Filtered
P04278	Sex hormone-binding globulin	SHBG_HUMAN	17874.9	15898.6	9404.94	14055.8	6209.06	Filtered	5766.25	5732.86	Filtered	10390.6	10451.1	10754.7	4990.67	11618.2	10217.9	2648.55	13261.5	Filtered	4128.54	6802.67	4651.52	17278.6	2410.35	4902.42	21071.5	7041.54	Filtered	Filtered	7386.01	12345.7	7297.67	6149.17	13894.3	Filtered	Filtered	6673.76	3713.58	Filtered	4034.88	32885.3	5837.09	7835.91	Filtered	18264.9	19754.2	25385	23201.5
P78324;Q5TFQ8	Tyrosine-protein phosphatase non-receptor type substrate 1;Signal-regulatory protein beta-1 isoform 3	SHPS1_HUMAN;SIRBL_HUMAN	Filtered	2913.82	5775.45	Filtered	Filtered	Filtered	3184.56	3617.35	2381.86	Filtered	Filtered	Filtered	3579.18	Filtered	4068.25	Filtered	4227.77	Filtered	4457.25	3376.2	Filtered	Filtered	3885.18	Filtered	Filtered	9484.42	5731.66	5258.71	Filtered	10770	13316.4	9339.27	5037.24	11521.3	Filtered	Filtered	Filtered	Filtered	Filtered	Filtered	34515.3	6095.75	Filtered	14225.9	16331	10367.2	9236.33
Q08ET2;O15389	Sialic acid-binding Ig-like lectin 14;Sialic acid-binding Ig-like lectin 5	SIG14_HUMAN;SIGL5_HUMAN	Filtered	Filtered	Filtered	Filtered	Filtered	Filtered	Filtered	Filtered	Filtered	Filtered	Filtered	Filtered	Filtered	Filtered	Filtered	Filtered	Filtered	Filtered	Filtered	Filtered	Filtered	Filtered	Filtered	Filtered	Filtered	Filtered	2524.1	2480.66	2935.1	Filtered	Filtered	Filtered	Filtered	Filtered	5793.1	4524.41	Filtered	2337.32	Filtered	Filtered	Filtered	Filtered	Filtered	Filtered	Filtered	Filtered	Filtered
O00241	Signal-regulatory protein beta-1	SIRB1_HUMAN	Filtered	Filtered	10535.4	Filtered	Filtered	Filtered	107060	Filtered	Filtered	Filtered	Filtered	186484	Filtered	Filtered	Filtered	Filtered	Filtered	Filtered	Filtered	Filtered	Filtered	Filtered	Filtered	Filtered	326093	Filtered	3317.27	70390.6	Filtered	173033	26302.1	Filtered	Filtered	Filtered	22489.8	Filtered	Filtered	13061.4	Filtered	4107.25	10701	Filtered	Filtered	Filtered	Filtered	Filtered	14753.9
Q9UIB8	SLAM family member 5	SLAF5_HUMAN	Filtered	Filtered	Filtered	Filtered	Filtered	Filtered	Filtered	3313.85	1371.73	Filtered	2055.55	2414	896.528	Filtered	2168.31	Filtered	8758.92	Filtered	Filtered	1613.82	Filtered	Filtered	Filtered	Filtered	Filtered	2702.29	3850.66	3703.41	7995.58	5463.41	4940.77	5058.72	Filtered	Filtered	4689.43	Filtered	Filtered	587.221	Filtered	Filtered	Filtered	Filtered	Filtered	Filtered	Filtered	Filtered	Filtered
P00441	Superoxide dismutase [Cu-Zn]	SODC_HUMAN	9017.49	Filtered	4019.88	5210.49	4738.65	Filtered	2337.34	3969.14	Filtered	7770.17	9981.77	4445.84	3940.59	Filtered	3101.97	Filtered	Filtered	Filtered	3089.62	Filtered	Filtered	9590.57	Filtered	Filtered	Filtered	6819.44	9431.23	Filtered	20913.8	17029.4	10417.1	9585.16	2018.61	7106.38	4294.32	10017	12380.8	7539.99	10595	Filtered	11918.8	36846.7	Filtered	13988.1	5796.4	2964.89	8263.14
P08294	Extracellular superoxide dismutase [Cu-Zn]	SODE_HUMAN	2995.1	3921.43	5511.12	5165.89	7338.94	2840.79	7692.56	3264.84	3505.88	3481.95	5531.94	4530.72	5327.81	4699.92	4633.02	11925	7588.6	2927.49	10563	4378.72	7211.24	15032	5393.24	5709.86	Filtered	6323.23	1130.75	7006.65	5444.37	6996.94	5314.18	46179.8	7484.22	4869.26	5914.02	6413.6	3215.83	6122.45	8148.86	Filtered	4472.16	5390.18	Filtered	5086.63	3852.57	3081.93	2138.71
P04179	Superoxide dismutase [Mn], mitochondrial	SODM_HUMAN	Filtered	Filtered	3577.46	Filtered	2215.67	Filtered	3037.65	Filtered	3044.89	Filtered	3161.79	2506.51	1564.6	Filtered	1140.13	1342.29	3351.47	Filtered	Filtered	1523.35	2714.76	1553.14	Filtered	Filtered	Filtered	Filtered	9467.97	16796.6	6450.09	8379.55	12750.1	9324.54	5282.3	10114.8	6159.83	5257.45	10682.2	36229.1	18791.5	Filtered	2806.02	Filtered	Filtered	6907.09	Filtered	Filtered	Filtered
Q13103	Secreted phosphoprotein 24	SPP24_HUMAN	1966.24	2409.64	2229.25	Filtered	1746.84	1680.64	2106.31	1811.73	Filtered	Filtered	2599.88	1480.9	1433.01	2700.73	2822.21	1449.42	591.057	1605.75	376.306	275.529	Filtered	1803.85	3935.16	1392.37	9435.81	1433.5	517.969	1006.47	Filtered	2685.27	Filtered	Filtered	Filtered	Filtered	Filtered	Filtered	Filtered	Filtered	Filtered	Filtered	Filtered	Filtered	13734.9	Filtered	Filtered	Filtered	Filtered
P09486	SPARC	SPRC_HUMAN	31913.7	28452.7	26377.6	40355.6	33212.3	39997	52453.5	29829.8	47654.3	29688.3	32081.2	10660.9	31723.5	32659.2	22488.4	34307.4	14650.7	32861.4	43700.6	42947.3	4550.9	20907.8	41651.2	18949.8	Filtered	40315.8	Filtered	3009.03	1233.56	Filtered	5207.36	Filtered	Filtered	Filtered	5027.49	7121.76	21380.5	4789.11	8673.85	Filtered	Filtered	1708.01	Filtered	17309.9	8942.05	4670.67	Filtered
Q14515	SPARC-like protein 1	SPRL1_HUMAN	6556.67	4800.14	5347.23	Filtered	4446.01	3481.47	6581.9	4432.54	3170	1426.42	2676.82	2656.16	4178.49	5972.33	4152.24	4466.25	5510.3	4939.67	3328.42	5385.49	Filtered	3777.13	6051.27	1878.9	Filtered	7254.21	Filtered	2066.33	Filtered	1531.01	1438.62	678.162	2045.92	Filtered	Filtered	Filtered	Filtered	2205.94	Filtered	Filtered	Filtered	Filtered	Filtered	Filtered	Filtered	Filtered	Filtered
A1L4H1	Soluble scavenger receptor cysteine-rich domain-containing protein SSC5D	SRCRL_HUMAN	Filtered	Filtered	64275.4	Filtered	66123.5	Filtered	Filtered	50854	103423	Filtered	Filtered	Filtered	Filtered	109994	Filtered	Filtered	Filtered	Filtered	Filtered	Filtered	Filtered	Filtered	Filtered	Filtered	Filtered	Filtered	Filtered	5362.07	2616.13	2817.36	Filtered	Filtered	3034.8	Filtered	Filtered	Filtered	4961.88	Filtered	Filtered	8163.31	7539.12	12463.6	787913	6130.12	Filtered	7751.98	6988.11
P10124	Serglycin	SRGN_HUMAN	25988.4	5973.74	19120.5	21474	17885.6	15736.9	8399.29	15408.5	19265.8	13395.3	8360.06	9632.81	14884.9	10498.9	15405.3	18200.3	17363.1	11792	23243.9	23916.1	9753.71	16056.1	8340.62	6102.75	Filtered	38911.9	9994.66	Filtered	5166.48	11066	8557.21	10591.6	Filtered	27432.4	6118.96	11237.6	3270.89	2831.59	Filtered	Filtered	Filtered	Filtered	Filtered	Filtered	2076.02	2450.24	5205.88
P61956;P55854;Q6EEV6	Small ubiquitin-related modifier 2;Small ubiquitin-related modifier 3;Small ubiquitin-related modifier 4	SUMO2_HUMAN;SUMO3_HUMAN;SUMO4_HUMAN	3144.79	3040.75	2462.71	Filtered	3871.04	Filtered	4648.69	2173.97	2596.04	4445.93	9899.96	4733.12	2962.48	Filtered	4537.29	Filtered	Filtered	Filtered	Filtered	Filtered	Filtered	Filtered	Filtered	Filtered	Filtered	6455.18	3406.92	9699.08	19900.4	6284.54	9768.56	8733.58	1770.67	2565.27	8012.07	18963.4	14134	15053.6	Filtered	44230.5	17589.2	19985.3	41011.9	Filtered	7110.7	Filtered	13180.1
P37802	Transgelin-2	TAGL2_HUMAN	21831.2	19173.4	16926.3	4312.05	12608.5	7637.52	12768.5	9893.32	6446.47	11493.8	16994.5	20399	12998.6	13460.8	20740	Filtered	Filtered	Filtered	1145.33	1157.69	Filtered	20042.9	Filtered	Filtered	29992.4	26373.8	16005.8	16648.8	77519.6	21765.9	37902.7	26510.6	5247.56	27300.2	25984.2	44573	39673.3	13079	26164.6	120208	22992.1	23340.1	Filtered	Filtered	17300.4	8053.69	24047.6
P37837	Transaldolase	TALDO_HUMAN	17642.9	29594.2	17798.7	Filtered	2619.18	60011	Filtered	21956.7	22826.2	Filtered	3584.99	3828.97	Filtered	Filtered	31393	46746	16024.5	48345.4	30340.2	33467.4	Filtered	52069.8	53870.5	29129.8	Filtered	15773.9	4944.12	6634.36	8459.93	3767.24	Filtered	6047.95	4786.38	3472.06	24417.2	6246.64	3741.64	5674.02	7954.13	20381	3372.98	8590.2	Filtered	10498.5	6769.25	Filtered	10896.9
Q7Z7G0	Target of Nesh-SH3	TARSH_HUMAN	3788.79	8415.62	9800.48	6583.93	11726.4	10563.3	9168.49	10944.5	14393.5	15321.9	6296.71	9074.85	9864.07	10440.9	11493.8	11294.4	18087.1	12171.4	7028.54	4684.02	8373.28	6883.18	13596.1	8571.51	Filtered	16190.3	22780.9	34755.1	27514.8	35339.5	24000.6	21835.3	16087.2	59707.9	11532.3	17253.3	14064.9	17655.1	21294.7	51087.1	23735.9	21920.4	307007	19497	30278.6	23228.7	33101.4
O75347	Tubulin-specific chaperone A	TBCA_HUMAN	Filtered	Filtered	Filtered	Filtered	Filtered	Filtered	Filtered	Filtered	Filtered	Filtered	Filtered	Filtered	Filtered	Filtered	Filtered	Filtered	Filtered	Filtered	Filtered	Filtered	Filtered	Filtered	Filtered	Filtered	Filtered	Filtered	Filtered	Filtered	1619.65	Filtered	Filtered	Filtered	Filtered	Filtered	Filtered	Filtered	415.128	Filtered	Filtered	Filtered	Filtered	Filtered	Filtered	Filtered	Filtered	Filtered	Filtered
P24821	Tenascin	TENA_HUMAN	18100	Filtered	10261.5	5196.59	3978.71	Filtered	7906.44	2625.54	2775.93	Filtered	2377.32	3632.31	9251.61	4722.65	5433.66	Filtered	4356.13	Filtered	1407.01	3635.39	Filtered	829.009	Filtered	Filtered	Filtered	8547.1	Filtered	Filtered	Filtered	Filtered	3860.11	Filtered	Filtered	Filtered	2428.96	Filtered	Filtered	Filtered	Filtered	Filtered	Filtered	12714	Filtered	Filtered	Filtered	Filtered	Filtered
P22105	Tenascin-X	TENX_HUMAN	36764.4	33678.8	31063.3	30657.1	29299.4	40150.9	31226.2	26646.4	27225.1	33785.3	24427.9	30804.5	22962.1	28563.9	19172.7	24410.2	41242.5	35016.3	21428.1	29957.2	30131.8	28033.1	37914	22259.9	45610.4	36086.4	19726.3	35292.2	35429.4	60355.9	31332.1	47162.1	33318.8	29065.2	32937.8	47610.7	26989.1	20781.9	28844.6	42808.3	40591.3	38559.9	87517.8	19670.1	54988.4	46827.1	53994.4
P05452	Tetranectin	TETN_HUMAN	91922.8	48318	66260.1	68784.7	79028.2	47018.7	60318.1	51739.9	48311.6	59850.5	43792	36078.5	58861.9	43793.3	53693.5	71578.3	81283.1	51118.6	43161	78948	72496.8	42734.6	54084.5	49106.7	32051.6	86750.2	52617.3	49107.3	60916.1	81209.3	21922.3	39276.8	35230.9	84836.7	24144.7	50023.5	39580.1	19842.6	18098.7	145855	29346.8	34379	475062	33094.5	65983.9	77989.4	59970.6
P02786	Transferrin receptor protein 1	TFR1_HUMAN	Filtered	Filtered	Filtered	Filtered	Filtered	Filtered	1933.23	9425.43	3930.31	Filtered	3549.99	3328.71	3414.95	2796.18	1008.03	4124.23	5117.85	6868	6986.72	7089.33	Filtered	4305.66	4294.53	3826.44	Filtered	Filtered	18320.3	2990.83	4685.58	4427.8	5399.58	7409.47	6413.12	6958.77	6452.76	3823.04	35591.4	7286.65	Filtered	Filtered	3724.03	7106.17	Filtered	10617.9	4069.73	3918.71	9206.95
P05543	Thyroxine-binding globulin	THBG_HUMAN	55577.6	51342.1	33761.7	30534.7	23733.2	75038.6	18964.4	25793.3	28843.4	33086.3	29744.2	19981.7	37663.3	48098.5	31532.2	25980.9	41599.7	48050.2	31921.8	32603.3	26020.2	40776.9	39355.9	33352	24611.5	162911	66040.7	242422	121917	146104	64961.1	48307.4	32811.4	49733.2	76900.2	104278	77927.6	161107	90334.9	575579	73519.4	97633.2	32568.7	114629	45651.8	37066.3	48938.4
P00734	Prothrombin	THRB_HUMAN	1.80924e+06	493921	565094	780567	759443	1.14134e+06	570270	603202	940047	701479	569499	467449	727187	573646	799350	996266	694156	768217	644264	627368	700323	624815	633451	345231	190604	1.52757e+06	983679	1.19597e+06	1.32129e+06	2.94754e+06	725781	844627	782019	1.34074e+06	713678	1.04119e+06	802190	720866	335769	2.11033e+06	649439	527576	14618380	700490	719117	863797	1.42641e+06
P01033	Metalloproteinase inhibitor 1	TIMP1_HUMAN	20246.5	36055.9	16717.6	15854	14725.4	30100.4	15914.9	18220.8	19570.3	25896.2	12259.8	14968.3	12705.3	11486.9	11552.9	16815.2	15034.2	15743.2	21588.1	16042.3	16762.6	24007.4	16427.3	11793	48699.3	17806	28827.9	58912.3	41669.2	69961.3	29059.6	25537	40041.9	43676.5	37756.3	32654.2	28865	33977.8	33658.3	164199	49145.1	44684.3	Filtered	83918.1	45102.4	44941.2	65962.9
P29401	Transketolase	TKT_HUMAN	10952.7	17218.3	11617.7	4646.58	6427.11	Filtered	15247	6195.55	4111.34	17877.8	29363.8	10206.8	5757.3	Filtered	12880.8	5721.88	649.698	Filtered	5331.77	6303.48	Filtered	3055.21	2946.65	5154.95	Filtered	10027.6	Filtered	Filtered	7987.82	Filtered	5457.54	6982.95	8561.3	Filtered	6975.34	9397.01	Filtered	204.411	Filtered	Filtered	3093.22	Filtered	Filtered	3416.43	11848.7	Filtered	8390.16
Q66K66	Transmembrane protein 198	TM198_HUMAN	50218.8	27788.8	25913.4	36923.5	22371.2	71670	24429.2	43040.3	30908.7	88698.9	45397.7	42011.4	27742.1	21941.9	19227.3	45923.5	66023.1	101216	95810.1	90828	65852.2	45484.3	58633.7	41975.4	127834	146285	164798	93487.8	57016.5	128422	75451.5	86970.4	98742.2	209813	92375.5	38196.5	116148	119713	143586	260162	101205	43738.9	2191952	77666.5	172327	107290	87350.1
Q9Y320	Thioredoxin-related transmembrane protein 2	TMX2_HUMAN	Filtered	11924.8	2100.79	Filtered	2053.38	4389.66	3619.7	5715.05	3670.12	Filtered	3441.02	3667.33	2311.06	2323.95	Filtered	1535.52	7723.9	3747.52	Filtered	Filtered	Filtered	Filtered	5276.46	Filtered	Filtered	Filtered	Filtered	Filtered	Filtered	Filtered	Filtered	6855.61	Filtered	Filtered	Filtered	2944.84	12778	5764.84	463.495	Filtered	2938.63	Filtered	Filtered	8403.32	Filtered	5364.08	905.275
P60174	Triosephosphate isomerase	TPIS_HUMAN	1861.69	1740.83	1342.1	Filtered	910.811	Filtered	2632.46	1603.69	Filtered	Filtered	14444	1695.11	Filtered	Filtered	1108.15	377.164	Filtered	Filtered	Filtered	Filtered	Filtered	Filtered	Filtered	Filtered	Filtered	5269.9	Filtered	4761.71	17066	12274.2	2690.08	3169.1	2166.55	Filtered	2287.72	4298.48	6168.89	2272.63	2268.14	97032.5	1997.11	10357	97472.3	909.898	1894.44	2157.16	4555.79
P09493	Tropomyosin alpha-1 chain	TPM1_HUMAN	4452.02	Filtered	2411.88	Filtered	2069.85	Filtered	1190.92	Filtered	1051.79	Filtered	4895.45	3126.82	1598.83	745.109	12020.4	Filtered	Filtered	Filtered	Filtered	Filtered	Filtered	Filtered	Filtered	Filtered	Filtered	5257.92	Filtered	Filtered	22245	5757.82	6341.61	3483.07	Filtered	Filtered	3508.44	6639.59	11034	5752.18	1516.95	Filtered	5222.11	1642.35	Filtered	Filtered	Filtered	Filtered	3073.46
P07951;P67936	Tropomyosin beta chain;Tropomyosin alpha-4 chain	TPM2_HUMAN;TPM4_HUMAN	1591.69	Filtered	1642.02	Filtered	Filtered	Filtered	576.034	Filtered	Filtered	Filtered	2650.6	2945.21	4419.56	394.166	1524.59	Filtered	Filtered	Filtered	Filtered	Filtered	Filtered	Filtered	Filtered	Filtered	Filtered	4170.78	Filtered	Filtered	7155.26	Filtered	2950.45	Filtered	Filtered	Filtered	Filtered	2502.81	1558.43	1363.66	Filtered	Filtered	Filtered	Filtered	Filtered	Filtered	Filtered	Filtered	Filtered
P02787	Serotransferrin	TRFE_HUMAN	4985465	5.68503e+06	2723371	4727147	4252943	9140073	3627400	4.85679e+06	6.77973e+06	3809219	6821877	4518330	5.05997e+06	6587560	3.18861e+06	3312127	4614920	4.89853e+06	8307038	5732058	6123825	5484382	8884394	2.62431e+06	17886772	1.85648e+06	7598989	7.70078e+06	8981188	7.193e+06	6.63694e+06	7429811	6.65309e+06	8.16778e+06	4820331	4.83581e+06	22072978	7593925	5.96782e+06	11601564	4606968	9754152	72951848	8647797	8722269	6685777	10230099
P02788	Lactotransferrin	TRFL_HUMAN	Filtered	26359.6	5302.33	Filtered	9677.09	16077	7677.46	7477.79	5165.42	9244.26	17088.8	13566.3	Filtered	Filtered	9389.91	2592.71	Filtered	4045.53	6090.4	Filtered	Filtered	2028.7	6214.27	Filtered	Filtered	1458.09	25937	961.691	5659.38	2726.17	12138.7	20360.9	22614.3	192426	19987.7	2885.91	98425.5	17107.6	11302.7	Filtered	13631.3	7991.11	Filtered	16368.1	41460.8	13783.7	64099.4
P07996	Thrombospondin-1	TSP1_HUMAN	37283.6	35768.9	27725.8	27191.4	37950	25025.9	18165.3	33620	20424.5	46180.4	30774.2	55180.6	32486.9	58471.6	52578.2	47123.1	18962.9	36696	34617.4	47887.3	16837.1	33723.9	55420.8	35638.6	59012.7	45162.2	18901.3	20991.6	24359.3	46133.7	27716.4	15683.7	21807.8	18748.6	23078.1	23467	14107.1	23829.2	12720.6	99981.3	20488.1	30031.1	261373	11132.8	23128	15527.7	38342.7
P35443	Thrombospondin-4	TSP4_HUMAN	Filtered	Filtered	Filtered	4378.21	Filtered	Filtered	Filtered	Filtered	Filtered	2770.23	8235.66	Filtered	Filtered	Filtered	Filtered	Filtered	Filtered	Filtered	Filtered	6796.25	Filtered	Filtered	2297.75	3543.51	Filtered	Filtered	Filtered	Filtered	Filtered	Filtered	Filtered	Filtered	Filtered	Filtered	Filtered	Filtered	Filtered	Filtered	Filtered	Filtered	Filtered	Filtered	Filtered	Filtered	Filtered	Filtered	Filtered
P02766	Transthyretin	TTHY_HUMAN	1.76868e+06	2884771	1.54625e+06	2.62622e+06	1.41654e+06	2.74295e+06	1.62383e+06	1.83924e+06	1.05697e+06	2.92335e+06	1.51419e+06	1.55662e+06	1596194	1.74779e+06	1669155	2.30414e+06	2366529	3171508	3.9031e+06	2.48337e+06	3.48467e+06	2.78793e+06	2.86722e+06	2.0442e+06	7.4641e+06	1.91176e+06	5949150	3.26808e+06	4.85934e+06	4.13369e+06	2.13724e+06	3147759	2646522	6077795	2955674	2389844	4502510	2356971	2.27783e+06	4893933	2.51385e+06	3.03623e+06	119568664	4.27036e+06	3635373	2.46529e+06	5229384
Q9NNX1	Tuftelin	TUFT1_HUMAN	13355.2	11840	20095.4	30044.5	52633.2	26257.9	35453.9	33892.2	11302	37888.7	12251.7	30341.8	21438.7	Filtered	13387.7	56259.9	44161.7	112105	70587.8	66881.6	23232.6	28927.1	72490.5	34628.8	Filtered	16772.6	19551.5	4254.83	7056.28	6262.48	8740.43	3545.68	2377.54	23399.2	15752	6464.08	14315.4	10704.6	22510.9	Filtered	6340.66	Filtered	Filtered	Filtered	Filtered	7931.52	Filtered
P30530	Tyrosine-protein kinase receptor UFO	UFO_HUMAN	8789.32	Filtered	7708.22	Filtered	Filtered	Filtered	10236.3	4547.59	4227.99	Filtered	Filtered	6959.28	5665.3	Filtered	3085.91	3983.65	8616.55	8502.48	5412.67	Filtered	Filtered	11228.9	6242.26	3409.82	Filtered	13824.8	11867.7	11643	6051.35	12690.3	3592.54	Filtered	9340.43	Filtered	6442.45	6568.33	Filtered	7090.56	11356.3	Filtered	7194.45	5268.63	Filtered	9787.64	16125.7	Filtered	10067.8
P11684	Uteroglobin	UTER_HUMAN	8618.83	Filtered	5570.38	Filtered	Filtered	Filtered	9499.88	Filtered	8302.38	8645.17	Filtered	5904.09	9900.32	Filtered	6359.26	Filtered	Filtered	6113.09	Filtered	Filtered	Filtered	Filtered	Filtered	6514.77	Filtered	30627.9	7326.98	18374.1	8819.77	8410.34	8390.8	7969.33	6391.29	10692.9	16755.9	35118.6	44967.6	31355.9	28618.7	73686.7	21360	12681.1	Filtered	8048.74	7628.25	12234.8	8140.03
Q6EMK4	Vasorin	VASN_HUMAN	41914.2	32824.3	29412.1	29295.9	26420.1	26039.8	35592.3	28098.2	26994.5	41384.9	23866.2	40091.3	28163.8	25115.5	26015.2	43420.6	34879.9	46403.9	28511.8	30285.6	44211.3	45121.7	32414.3	27577	77291.5	47847.6	60191.2	66936.4	52054.1	78659.5	33639.4	60704.4	47362.4	52619.8	47896.3	55879	39635	49527.4	49630.7	63900.3	37664.3	42077.8	77462.3	67420.1	75559.5	45406.1	54779.3
P50552	Vasodilator-stimulated phosphoprotein	VASP_HUMAN	Filtered	Filtered	Filtered	Filtered	1460.08	Filtered	Filtered	Filtered	Filtered	Filtered	Filtered	Filtered	Filtered	Filtered	Filtered	Filtered	Filtered	Filtered	Filtered	4731.2	Filtered	Filtered	6038.79	Filtered	Filtered	Filtered	24870	Filtered	17420.3	27191.6	4569	2634.51	Filtered	Filtered	Filtered	Filtered	16023.1	Filtered	Filtered	8813.57	7084.51	743.052	Filtered	Filtered	Filtered	Filtered	Filtered
P19320	Vascular cell adhesion protein 1	VCAM1_HUMAN	20261.8	16835.5	16230.1	26503.9	11777.2	14943.4	14381.8	15118.4	7579.02	42708	9008.87	11038	11196.4	16707	11972.2	12760.7	16851.5	19585.5	18980.3	14511.7	10853.9	15871.3	12245.5	10645	32824.1	26250.3	17549.9	9520.77	8698.84	18742.8	8839.63	7804.41	13996.2	11261.6	9130.16	13663.5	11424.3	9392.46	9379.93	38380.2	10873.5	14657.8	Filtered	23880.4	35274.8	19667.2	14830.8
P35916	Vascular endothelial growth factor receptor 3	VGFR3_HUMAN	6877.82	7626.2	3739.73	2470.6	6388.76	Filtered	5467.38	3596.97	3698.31	3489.09	3881.32	4388.3	8120.79	Filtered	2502.29	1428.03	3202.9	Filtered	3466.58	8112.22	Filtered	4203.09	2711.31	3681.24	Filtered	7190.93	5427.07	Filtered	1894.22	5188.15	2414.08	3581.68	6481.21	Filtered	8943.26	5080.21	2390.23	4798.33	Filtered	Filtered	Filtered	1612.73	Filtered	Filtered	11006.6	11408	9818.73
P08670	Vimentin	VIME_HUMAN	Filtered	Filtered	Filtered	Filtered	Filtered	Filtered	Filtered	Filtered	Filtered	Filtered	15199.8	409.162	Filtered	Filtered	Filtered	Filtered	Filtered	Filtered	Filtered	Filtered	Filtered	Filtered	Filtered	Filtered	Filtered	Filtered	Filtered	Filtered	Filtered	Filtered	Filtered	Filtered	Filtered	Filtered	Filtered	Filtered	Filtered	Filtered	Filtered	Filtered	Filtered	Filtered	Filtered	Filtered	Filtered	Filtered	Filtered
O95497	Pantetheinase	VNN1_HUMAN	13964.5	106815	17758.9	3897.38	2588.18	3745.17	29152.3	28058.6	22780.9	23555.6	22478.4	23286.6	27408.6	23504.3	46335	26598	27005	33472.9	52636.2	Filtered	43293.9	15910.7	13373.7	28722.6	123517	11616.3	84579.5	105185	47444.1	63986.2	133348	80845.1	28630.8	264473	28635.7	18951.7	17516.3	11125.1	Filtered	Filtered	16451.2	74496	490451	70362.8	49383.1	16488.4	107162
Q9Y279	V-set and immunoglobulin domain-containing protein 4	VSIG4_HUMAN	773.799	Filtered	Filtered	Filtered	Filtered	Filtered	Filtered	Filtered	Filtered	Filtered	Filtered	220.455	Filtered	Filtered	Filtered	Filtered	Filtered	Filtered	Filtered	Filtered	Filtered	Filtered	Filtered	Filtered	Filtered	2332.66	2851.36	4433.41	4758.2	8683.34	576.973	1877.57	Filtered	1157.6	618.323	Filtered	Filtered	Filtered	Filtered	Filtered	Filtered	2372.36	Filtered	5827.01	Filtered	Filtered	Filtered
P02774	Vitamin D-binding protein	VTDB_HUMAN	14702758	11804000	11214758	9029877	12126873	12292886	12535988	10443106	14205210	9998718	8994685	8984505	13181185	6.79958e+06	12143781	9512285	11276851	9458332	8236777	8342360	11189459	9246432	12299480	7514651	25023530	14554403	26971912	31237128	24256020	26801088	16060763	14412482	14080737	24053490	16179695	7.81204e+06	16655424	18226202	29006198	64193676	26599318	29889406	99339192	35665648	21761572	25424262	23857626
P04004	Vitronectin	VTNC_HUMAN	4277474	3.93095e+06	3522608	4.56079e+06	5.47409e+06	4592455	5015107	5916505	4.83267e+06	6.20438e+06	4.04349e+06	2.52233e+06	4.08249e+06	3.36891e+06	2183028	6016227	3980147	5868693	5.70167e+06	3.76738e+06	6.23952e+06	3.38727e+06	2.14321e+06	5700552	2.8174e+06	5269643	225423	435481	1.08195e+06	1.30694e+06	1.54449e+06	1.41565e+06	2.82936e+06	665873	1.48544e+06	2132517	1.1852e+06	1219974	403529	768466	708484	837728	513138	707342	1.26256e+06	1.56842e+06	1.21267e+06
P04275	von Willebrand factor	VWF_HUMAN	23136.4	18238.2	13815	12207.6	20458.2	8408.96	6903.68	12151.6	8736.63	16393.4	7558.15	9499.45	9644.79	54726.1	15217.5	12669.1	12462.5	10368.5	17522.1	5887.92	39309	8699.99	4417.62	5110.31	30687.1	14316	49855.2	12531.2	15934.8	20733.6	12381.9	12879.3	11166.1	15664.3	17189.2	30674	17439	5186.8	11952	926775	10049.1	18705.1	38596.7	61657.4	96228.1	6305.12	20673.6
O43895	Xaa-Pro aminopeptidase 2	XPP2_HUMAN	13676.6	Filtered	Filtered	2583.47	2398.01	Filtered	Filtered	2825.02	760.528	Filtered	4439	Filtered	5934.28	17168	4659.15	Filtered	4999.62	Filtered	Filtered	Filtered	Filtered	9258.61	Filtered	Filtered	Filtered	11073	8584.21	9628.57	10436.2	12522.4	11225.2	Filtered	3793.48	Filtered	17896.7	Filtered	8310.51	3890.14	18426.8	Filtered	7348.23	3919.73	Filtered	17080	Filtered	3280.41	Filtered
P25311	Zinc-alpha-2-glycoprotein	ZA2G_HUMAN	270522	226266	238936	220737	236149	223174	307617	271146	240977	205109	105875	275728	296859	167547	218055	309633	246022	268479	187693	261209	257213	218826	188064	127539	87400.2	179224	246841	113081	75806	61794.9	192685	188131	215781	374104	264220	53188.2	128811	174223	296029	141060	147218	146345	170879	256960	347339	298204	323668
Q9UK55	Protein Z-dependent protease inhibitor	ZPI_HUMAN	4483.08	6904.84	7921.68	11744.9	6107.71	3163.71	3901.53	5048.1	3255.94	12899.7	5714.77	10964.5	3996.1	9034.55	8706.48	4900.37	5364.03	7606.18	9489.04	2704.81	Filtered	1563.21	7056.91	8673.97	Filtered	3665.35	25321	1953.62	9635.87	10451.4	9957.66	9860.38	20265.5	9412.66	14508.2	7959.93	15780.2	16458.6	Filtered	11520.7	5224.11	4338.79	Filtered	18389.2	24164.7	54333.1	14011.3
Q15942	Zyxin	ZYX_HUMAN	4825.65	6155.21	10077.2	Filtered	6441.46	Filtered	9604.15	5223.79	8481.5	3933.54	7498.48	5900.55	5998.49	2315.89	9037.85	Filtered	Filtered	Filtered	Filtered	Filtered	Filtered	Filtered	Filtered	Filtered	14968.4	56445	4548.43	19875.7	34108.1	22843.9	33642.8	24384.4	8470.25	11311.4	69281.7	30351.1	113745	51190.6	32313.3	197476	53218.4	7520.92	15983.9	5325.77	5347.98	4189.62	11808.9
[truncated: 7 more columns]
