# Supplementary material for: Novel circulating protein biomarkers for thyroid cancer determined through data-independent acquisition mass spectrometry
Source: PeerJ. 2020 Jul 6;8:e9507. doi: 10.7717/peerj.9507 (PMC7346861; doi:10.7717/peerj.9507)
Supplement: Supplemental Information 2 [file peerj-08-9507-s002.xlsx]

## Sheet: DEPs
SAMPLENAME			1	2	3	4	5	6	7	8	9	10	11	12	13	14	15	16	17	18	19	20	21	22	23	24	25	33	34	35	36	37	38	39	40	41	42	43	44	45	46	47	48	49	50	51	52	53	54
PG.ProteinGroups	group	PG.ProteinDescriptions	TN	TN	TN	TN	TN	TN	TN	TN	TN	TN	TN	TN	TN	TN	TN	HC	HC	HC	HC	HC	HC	HC	HC	HC	HC	PTC	PTC	PTC	PTC	PTC	PTC	PTC	PTC	PTC	PTC	PTC	PTC	PTC	FC	FC	FC	FC	FC	FC	MC	MC	MC
A4_HUMAN	P05067	Amyloid beta A4 protein	2433.97	3181.64	3976.82	2818.78	4526.35	2829.72	3218.18	4117.95	3092.95	2587.25	3305.58	3090.12	2654.4	1768.65	2934.29	4040.7	3132.62	2147.86	4446.49	5839.19	1934.07	2879.76	3953.84	2820.86	3341.85	Filtered	Filtered	Filtered	340.804	Filtered	Filtered	842.982	935.147	Filtered	Filtered	Filtered	Filtered	Filtered	Filtered	Filtered	Filtered	372.147	Filtered	Filtered	Filtered	902.304	Filtered
AACT_HUMAN	P01011	Alpha-1-antichymotrypsin	16012331	8056074	12702610	8.25303e+06	7.54913e+06	8879794	11809263	11135249	21583650	7.40785e+06	6.64949e+06	8111030	14341307	8547589	9183415	6360450	9020755	8443458	8.37733e+06	8404453	8108592	8224272	7.14931e+06	5.36424e+06	20473408	16064989	34547228	24993990	22675406	23639694	34646624	30357660	25318924	36950180	17363496	18435866	23320294	33757692	21815654	42948688	39884328	63607924	58541312	64480400	23877934	27060398	33442600
AMPN_HUMAN	P15144	Aminopeptidase N	15733.1	14756.3	15920.4	29192.1	15565.3	12945.9	12792.4	8527.75	9449.7	20636.7	12321.8	13219.4	15157.2	11871.6	17382.8	12358.5	22519.2	15965.7	13815.2	9447.65	18261.6	18068.3	19905.1	12644.7	11047.7	21570.7	51437.1	75280.6	35583.4	40386.5	34884.1	38146.2	18824.9	66125.8	29540.4	26835	25418.1	34338.6	51352.8	31786.7	56997.6	49643.3	49496.1	39228.2	36921.8	27957.1	37734.7
APOA1_HUMAN	P02647	Apolipoprotein A-I	7.16489e+06	6274838	11942270	10823878	7.70434e+06	6643920	14112588	16744737	6543207	9714770	16768785	8437013	8414497	14901098	6466251	11070833	17372492	10086094	12545786	21825140	10905215	19869354	12442305	14783052	9020170	12562967	1.09259e+06	917096	2.00929e+06	2659018	4.44148e+06	1.96013e+06	5.7255e+06	1.2866e+06	3.13453e+06	2.52658e+06	2.22351e+06	1.35345e+06	860716	1.80921e+06	1.23527e+06	2.35521e+06	3.9639e+06	1.57467e+06	3.04925e+06	4701958	3416492
APOA2_HUMAN	P02652	Apolipoprotein A-II	936645	1059135	1.3249e+06	637232	554630	442845	1072476	1.55119e+06	809314	768870	1.92302e+06	816788	847701	1.06981e+06	474338	1.56005e+06	736281	1.15169e+06	428355	596695	631379	1483144	1420918	1.0068e+06	759904	739670	151389	296568	217254	363002	248723	215080	404780	91856	388826	441762	552009	250606	274540	320776	186523	429950	426553	209311	317207	341691	301497
APOA4_HUMAN	P06727	Apolipoprotein A-IV	6.2027e+06	3.94454e+06	4592611	3.5513e+06	4361746	4.49026e+06	5895390	7512830	1.32952e+06	4.08953e+06	3.96904e+06	3.10336e+06	3.94236e+06	4718812	2.93021e+06	5303237	5032156	3.75639e+06	2.79186e+06	4918070	5011111	3.07628e+06	3.7178e+06	3567475	7.94904e+06	8479080	106383	108279	122742	274076	167652	214875	320539	424170	390389	347008	270954	236603	403638	194682	84083.7	385239	293704	289009	580890	378383	381744
C4BPB_HUMAN	P20851	C4b-binding protein beta chain	148302	97425.9	99933.7	65555.9	89409.2	76614	103113	89424.6	132144	97018.2	123554	100183	111740	118780	119843	98148.5	78577	91838.6	116370	106559	91164.6	118777	135019	107001	210232	166678	43558	26441.2	32835.9	28270.7	33625.1	3312.73	26165.3	104159	25269.2	33493.3	14556.6	20756.3	Filtered	34361.8	30953.5	31146.6	77407.8	23724.2	49268.1	31371.5	38930.1
CD166_HUMAN	Q13740	CD166 antigen	9553.77	6880.65	3394.27	6158.99	9935.29	11531.4	8902.18	8484.99	11206.8	10339.1	4821.06	4113.54	10431.7	10758.3	7015.89	3004.24	11406.1	7490.71	2108.35	3807.88	12067.7	1278.82	7434.69	3152.72	28431.4	17752	21391.2	19546	15628.6	24419.5	14846.1	21270.4	19648.8	18591.5	24702.8	32624.1	32004	33133.2	32472.7	97323.1	32149.7	35840.8	88620.6	39993	29472.8	16012.5	36944.6
CFAI_HUMAN	P05156	Complement factor I	488314	575092	402408	455614	460614	496724	422528	274739	473582	525387	426510	357265	376239	469591	515695	576804	372945	278314	355062	385804	332005	346843	412306	481110	338158	303793	1.35116e+06	2.93029e+06	1.97266e+06	2735680	1.19443e+06	1.25561e+06	989172	2.04164e+06	711337	877997	326754	710158	518972	2820030	923404	2476610	10593915	1.28632e+06	1006393	774797	1.39604e+06
CNTN1_HUMAN	Q12860	Contactin-1	9954.41	6770.52	9414.11	9931.05	8680.46	14539.6	10074.4	15996.1	7899.67	8682.23	6203.02	8241.15	14631.1	9464.41	10053	9321.71	18291.6	11323.2	4577.11	10274.8	8086.2	13524.9	11630.4	10455	22748.5	31116.9	18811.4	29924	23659.1	29893	23488.3	20141	29335.1	22100	24192.7	24457	12937.1	34043.6	42825.6	18478.4	43041.1	28799.8	Filtered	30288.9	33874.7	23592	24555.3
FA10_HUMAN	P00742	Coagulation factor X	447998	472855	442683	305899	282317	402623	336167	329112	228829	312593	528678	458576	354494	344866	359970	426670	282779	310147	278589	244498	268918	408534	305817	373177	743795	494204	93106.3	44622.8	125080	248346	171709	215303	160042	15014.7	229978	161396	116396	91097.4	10294	78029.2	111991	115255	406183	58698.1	258346	259003	144098
FCG3A_HUMAN	P08637	Low affinity immunoglobulin gamma Fc region receptor III-A	13111.3	15231.5	24040.4	8218.48	17121.2	14507.5	16708.8	12196.2	17867.9	16591.8	8991.51	13159.1	11561.3	14733.8	15611.3	9177.47	12716.9	14853.1	10623.1	12971.8	9647.14	11922	14328.3	11234	18673	23424.1	48626.4	46031.8	24283.6	63239.7	29875.2	25128.9	42125.1	82850.6	17472.6	18902	58340.7	23531.7	41076.9	68447.8	91003.9	56028.4	77305.7	55535.3	25862.5	20445.3	35811
FHR1_HUMAN	Q03591	Complement factor H-related protein 1	97148.4	140569	44497.1	95776.3	135279	65306.2	116152	70778.2	130677	83462.5	117017	100931	89667.1	63220.5	89718.1	113398	55669.7	65857.1	30946.4	57909.8	86278.8	87971.4	112184	78819.1	155133	95887.5	1067048	1.46829e+06	94067.7	2.06048e+06	201452	168617	103587	1.20801e+06	365188	1.70311e+06	654204	1.3685e+06	914638	3.46001e+06	1.39074e+06	1.33493e+06	189864	288814	242055	133389	785209
FINC_HUMAN	P02751	Fibronectin	1.52108e+06	1.75128e+06	1.15903e+06	1.21037e+06	1.01299e+06	597103	828095	846547	499264	1.4729e+06	1.05246e+06	1.25841e+06	1.00262e+06	1.59479e+06	1.21256e+06	1.09807e+06	625240	465320	1.00016e+06	724394	742681	1.17867e+06	999046	1.89876e+06	2.8587e+06	786095	200827	102814	152161	361959	343255	227852	372701	161432	471994	618374	254040	153726	140965	244349	162890	179378	197808	155975	546184	249178	156611
GELS_HUMAN	P06396	Gelsolin	290500	399609	349593	483879	279953	153496	290710	334438	81736.8	416466	399743	815155	251432	458119	227180	302647	282378	488220	352688	251369	366752	336177	313940	365232	478434	362709	122828	50749.8	136138	114383	95142.7	96554.5	177689	73641.3	261015	238684	90665.1	46026	50353.3	65386.6	30996.4	52697.3	81017	50216.3	139177	270547	172658
GGH_HUMAN	Q92820	Gamma-glutamyl hydrolase	31459.9	14810.5	20117.8	10197.1	27735.7	17313.8	36739.8	16708.2	42567	18944.2	10707.8	17052.9	28056.2	20529.6	18336.1	16799.3	16579.6	11950.5	11697.1	11272.6	18117	12358.7	14073.9	8922.54	32976.6	29248.8	68107.8	108331	64171.8	308022	67794.5	44448.1	88765.3	55546	40274.2	80272.9	64190.1	75132.1	91787.1	115439	55407.1	178549	274287	134437	53235.1	29604.6	157981
VTNC_HUMAN	P04004	Vitronectin	4277474	3.93095e+06	3522608	4.56079e+06	5.47409e+06	4592455	5015107	5916505	4.83267e+06	6.20438e+06	4.04349e+06	2.52233e+06	4.08249e+06	3.36891e+06	2183028	6016227	3980147	5868693	5.70167e+06	3.76738e+06	6.23952e+06	3.38727e+06	2.14321e+06	5700552	2.8174e+06	5269643	225423	435481	1.08195e+06	1.30694e+06	1.54449e+06	1.41565e+06	2.82936e+06	665873	1.48544e+06	2132517	1.1852e+06	1219974	403529	768466	708484	837728	513138	707342	1.26256e+06	1.56842e+06	1.21267e+06
[truncated: 7 more columns]
