# Supplementary material for: Novel circulating protein biomarkers for thyroid cancer determined through data-independent acquisition mass spectrometry
Source: PeerJ. 2020 Jul 6;8:e9507. doi: 10.7717/peerj.9507 (PMC7346861; doi:10.7717/peerj.9507)
Supplement: Supplemental Information 3 [file peerj-08-9507-s003.xlsx]

## Sheet: Sheet1
PG.ProteinGroups	group	PG.ProteinDescriptions	up or down regulation	foldchange(cancer/control)	adjusted p-value (cancer/control): Benjamini Hochberg adjustment was used
A4_HUMAN	P05067	Amyloid beta A4 protein	down	0.179	2.81437e-08
APOA4_HUMAN	P06727	Apolipoprotein A-IV	down	0.134	5.80838e-12
APOA1_HUMAN	P02647	Apolipoprotein A-I	down	0.258	4.49481e-12
FINC_HUMAN	P02751	Fibronectin	down	0.259	1.13403e-10
VTNC_HUMAN	P04004	Vitronectin	down	0.298	1.21684e-12
APOA2_HUMAN	P02652	Apolipoprotein A-II	down	0.337	1.99586e-10
GELS_HUMAN	P06396	Gelsolin	down	0.356	2.64778e-09
C4BPB_HUMAN	P20851	C4b-binding protein beta chain	down	0.418	6.31885e-08
FA10_HUMAN	P00742	Coagulation factor X	down	0.435	1.18939e-08
CNTN1_HUMAN	Q12860	Contactin-1	up	2.458	4.72218e-12
AMPN_HUMAN	P15144	Aminopeptidase N	up	2.566	3.55998e-10
AACT_HUMAN	P01011	Alpha-1-antichymotrypsin	up	3.188	2.25235e-09
FCG3A_HUMAN	P08637	Low affinity immunoglobulin gamma Fc region receptor III-A	up	3.194	2.00261e-06
CD166_HUMAN	Q13740	CD166 antigen	up	3.62	2.05027e-06
CFAI_HUMAN	P05156	Complement factor I	up	3.814	0.00245095
GGH_HUMAN	Q92820	Gamma-glutamyl hydrolase	up	4.66	2.56654e-06
FHR1_HUMAN	Q03591	Complement factor H-related protein 1	up	7.799	0.00026406
