# Supplementary material for: Novel circulating protein biomarkers for thyroid cancer determined through data-independent acquisition mass spectrometry
Source: PeerJ. 2020 Jul 6;8:e9507. doi: 10.7717/peerj.9507 (PMC7346861; doi:10.7717/peerj.9507)
Supplement: Supplemental Information 4 [file peerj-08-9507-s004.xlsx]

## Sheet: total validation data
code	group	gender	age(year)	ID	sample collection date	CFHR1 concentration（(ng/ml)）	metastasis	stage	TNM	CT	TG
1	1	1	32	42177577	2017.7	0.635
2	1	2	36	41261058	2017.7	0.568
3	1	1	36	40878769	2017.7	0.572
4	1	1	59	41947213	2017.7	1.005
5	1	2	50	C598960	2017.7	0.683
6	1	1	41	XH1120573	2017.7	0.607
7	1	2	60	28104957	2017.7	0.69
8	1	2	42	41361533	2017.7	0.611
9	1	2	57	18564543	2017.7	0.563
10	1	2	48	40658795	2017.7	0.716
11	1	2	40	1405150186	2017.7	0.604
12	1	2	43	C867989	2017.7	0.661
13	1	2	43	18656745	2017.7	0.604
14	1	2	35	26762435	2017.7	0.654
15	1	2	35	41558274	2017.7	0.635
80	1	2	23	44654164	2018.09.26	0.6397
81	1	1	24	44402416	2018.09.26	0.6327
82	1	1	27	42519927	2018.09.26	0.857
83	1	1	27	44417298	2018.09.26	0.6297
84	1	1	28	44807809	2018.09.26	0.57
85	1	1	28	42638689	2018.09.26	0.6347
86	1	1	28	44470491	2018.09.26	0.6613
87	1	1	28	42821397	2018.09.26	0.6468
88	1	1	29	42016612	2018.09.26	0.6307
89	1	2	30	43287107	2018.09.26	0.6407
90	1	2	30	43444678	2018.09.26	0.6377
91	1	1	31	42873350	2018.09.26	0.6337
92	1	1	32	42843277	2018.09.26	0.6317
93	1	2	32	41073147	2018.09.26	0.6468
94	1	1	32	41883956	2018.09.26	0.6327
95	1	2	33	43496138	2018.09.26	0.6387
96	1	1	34	40436576	2018.09.26	0.6287
97	1	1	34	41884341	2018.09.26	0.6418
98	1	1	35	40326025	2018.09.26	0.6397
99	1	2	35	42271727	2018.09.26	0.6428
100	1	1	35	43763287	2018.09.26	0.6267
101	1	1	36	42451653	2018.09.26	0.6327
102	1	2	36	43496131	2018.09.26	0.6317
103	1	2	36	43690586	2018.09.26	0.6327
104	1	1	37	42127854	2018.09.26	0.6257
105	1	2	37	1543557	2018.09.26	0.6347
106	1	1	37	42987194	2018.09.26	0.7225
107	1	1	37	41063662	2018.09.26	0.6428
108	1	1	37	44402442	2018.09.26	0.6218
109	1	1	37	44313537	2018.09.26	0.6297
110	1	1	38	42480225	2018.09.26	0.6277
111	1	2	38	42224163	2018.09.26	0.6317
112	1	2	39	18049596	2018.09.26	0.6247
113	1	1	39	19223045	2018.09.26	0.6238
114	1	1	42	44470319	2018.09.26	0.654
115	1	1	46	16960169	2018.09.26	0.6458
116	1	2	51	41139480	2018.09.26	0.6297
117	1	1	51	44442619	2018.09.26	0.6428
118	1	1	56	XH1079961	2018.09.26	0.6337
119	1	1	61	42961683	2018.09.26	0.6367
120	1	2	32	40200575	2018.09.27	0.6267
121	1	2	24	43444683	2018.09.27	0.6297
122	1	1	31	44714827	2018.09.27	0.6327
123	1	2	44	44438694	2018.09.27	0.6247
124	1	1	37	44806819	2018.09.27	0.6317
125	1	2	28	40123941	2018.09.27	0.6347
126	1	2	44	17487613	2018.09.27	0.6347
128	1	2	37	41359838	2018.09.27	0.9044
129	1	2	30	40219647	2018.09.27	0.6131
130	1	1	26	44402636	2018.09.27	0.7332
131	1	2	38	41268963	2018.09.27	0.6798
132	1	2	29	17969979	2018.09.27	0.5808
133	1	1	31	44284998	2018.09.27	0.6851
134	1	1	35	43390290	2018.09.27	0.5926
135	1	1	27	44804952	2018.09.27	0.6226
136	1	2	48	44470890	2018.09.27	0.7395
137	1	2	50	18196100	2018.09.27	0.7463
138	1	2	39	41264907	2018.09.27	0.7625
139	1	1	26	41574393	2018.09.27	0.8018
140	1	2	49	1518596	2018.09.27	0.7502
141	1	2	27	43964508	2018.09.27	0.7006
142	1	1	35	42223706	2018.09.27	0.7548
143	1	2	36	42982666	2018.09.27	0.9028
144	1	1	28	44470520	2018.09.27	0.9678
145	1	2	45	40813384	2018.09.27	0.7775
146	1	1	33	40203894	2018.09.27	0.7815
147	1	1	32	C354319	2018.09.27	0.702
148	1	1	23	44470715	2018.09.27	0.702
149	1	2	38	16691224	2018.09.27	0.6349
151	1	1	25	43766566	2018.09.27	0.5323
152	1	2	31	41193660	2018.09.27	0.5729
153	1	1	32	41884685	2018.09.27	0.6175
154	1	2	33	44765231	2018.09.27	0.5429
155	1	1	30	42129051	2018.09.27	0.6159
156	1	1	27	43670650	2018.09.27	0.5393
157	1	1	39	29120433	2018.09.27	1.3606
158	1	1	35	18289307	2018.09.27	0.6241
159	1	1	31	42795088	2018.09.27	0.62
160	1	2	40	40363425	2018.09.27	0.5422
161	1	1	34	43690476	2018.09.27	0.6015
162	1	1	27	42706467	2018.09.27	0.6442
163	1	1	31	42703802	2018.09.27	0.5575
164	1	2	30	42824119	2018.09.28	0.5677
165	1	1	30	42821393	2018.09.28	0.5443
166	1	2	30	42555460	2018.09.28	0.5559
167	1	1	28	43690539	2018.09.28	0.5372
168	1	1	43	18870918	2018.09.28	0.5529
169	1	1	51	XH1417376	2018.09.28	0.5393
170	1	1	62	40078422	2018.09.28	0.4865
171	1	1	32	44313543	2018.09.28	0.4439
172	1	2	48	42200123	2018.09.28	0.6054
173	1	1	61	XH1392430	2018.09.28	1.134
174	1	1	71	41463973	2018.09.28	0.4703
175	1	1	31	44823001	2018.09.29	2.1154
176	1	1	31	42915600	2018.09.29	1.4092
177	1	1	32	41676555	2018.09.29	1.017
178	1	1	32	C793011	2018.09.29	2.87
179	1	1	32	41231067	2018.09.29	1.0628
180	1	2	33	42131873	2018.09.29	0.6588
181	1	1	33	40091356	2018.09.29	0.454
182	1	2	34	17063916	2018.09.29	0.4451
183	1	1	34	41043098	2018.09.29	0.4291
184	1	1	34	44846866	2018.09.29	2.8063
185	1	1	34	44848464	2018.09.29	1.8975
186	1	1	34	41376737	2018.09.29	0.4285
187	1	2	35	44333606	2018.09.29	0.4148
188	1	1	35	41376738	2018.09.29	0.4913
189	1	1	35	44385520	2018.09.29	0.469
190	1	2	38	19249374	2018.09.29	0.4457
191	1	1	38	XH1365368	2018.09.29	0.5438
192	1	2	39	41142167	2018.09.29	0.7848
193	1	1	39	41756340	2018.09.29	0.4533
194	1	1	40	41147274	2018.09.29	0.8872
195	1	1	41	44654148	2018.09.29	0.467
196	1	1	41	40169974	2018.09.29	0.5523
214	1	2	30	17304016	2018.09.30	0.5529
215	1	1	30	44357077	2018.09.30	0.5393
216	1	2	30	41361517	2018.09.30	0.5737
217	1	1	30	43455366	2018.09.30	0.533
218	1	1	31	42127879	2018.09.30	0.5999
219	1	1	31	41267072	2018.09.30	0.5625
220	1	2	31	43194318	2018.09.30	0.5662
221	1	1	31	40748811	2018.09.30	0.561
222	1	1	31	41260845	2018.09.30	0.5493
223	1	2	32	43670677	2018.09.30	0.6103
224	1	1	33	42223826	2018.09.30	0.5706
225	1	1	33	42843313	2018.09.30	0.579
226	1	2	34	43390202	2018.09.30	0.5706
227	1	2	34	42262290	2018.09.30	0.6382
228	1	2	34	41366830	2018.09.30	0.5415
229	1	1	34	41361681	2018.09.30	0.5358
230	1	1	34	44068036	2018.09.30	0.5559
231	1	2	35	43374601	2018.09.30	0.6702
232	1	2	35	41486654	2018.09.30	0.5479
233	1	1	35	17559149	2018.09.30	0.5566
234	1	1	35	42127862	2018.09.30	0.5443
235	1	2	36	17289226	2018.09.30	0.7563
236	1	1	36	42223677	2018.09.30	0.7513
237	1	2	36	18920466	2018.09.30	0.7133
238	1	2	37	17967246	2018.09.30	0.5729
239	1	1	37	18363279	2018.09.30	0.5782
240	1	2	37	41261058	2018.09.30	0.596
241	1	1	37	42131824	2018.09.30	0.6349
242	1	2	37	16572476	2018.09.30	0.5782
243	1	2	39	17026295	2018.09.30	0.5677
244	1	1	40	28746835	2018.09.30	0.5515
245	1	1	40	27330640	2018.09.30	0.5625
246	1	2	41	XH1089912	2018.09.30	0.5479
247	1	1	41	42079085	2018.09.30	0.6765
248	1	1	41	18122588	2018.09.30	0.5677
249	1	1	41	17230051	2018.09.30	0.6536
250	1	1	42	42128996	2018.09.30	0.5309
251	1	1	42	42915590	2018.09.30	0.5379
252	1	1	44	42127816	2018.09.30	0.6103
253	1	1	46	41048507	2018.09.30	0.6119
254	1	1	46	41267085	2018.09.30	0.5302
255	1	1	47	41774720	2018.09.30	0.5393
256	1	1	48	42821447	2018.09.30	0.9762
257	1	1	48	XH1391434	2018.09.30	0.5714
258	1	1	49	41261137	2018.09.30	1.0988
259	1	1	50	41048465	2018.09.30	0.6241
2	2	1	57	43219282	2017.02.10	0.727
31	2	2	51	18368715	2017.02.14	1.911
34	2	2	39	26043744	2017.02.10	1.49
43	2	2	45	43263789	2017.02.10	0.67
47	2	2	43	43169719	2017.02.10	0.795
48	2	2	42	19061582	2017.02.10	0.82
54	2	2	59	43125481	2017.02.16	1.3					0.52
65	2	2	43	18560930	2017.02.14	0.661					4.32
68	2	2	49	43237318	2017.02.20	0.663
96	2	1	44	42914923	2017.02.16	1.423					2.23
97	2	2	56	43200512	2017.02.24	1.468
50	2	1	28	42326835	2017.04.01	0.91
87	2	1	67	43065511	2017.02.16	0.691					7.65
101	2	2	59	43181312	2017.03.20	0.72					4.88
102	2	2	62	42753310	2017.03.20	1.377
23	2	1	67	43998946	2017.11.15	0.653
33	2	2	55	43423259	2017.11.16	0.686
45	2	1	41	43413142	2017.11.16	0.703					9.04
46	2	1	56	43978108	2017.11.16	1.179					7.34
122	2	2	54	41444238	2017.12.25	0.6438					1.33
133	2	2	54	44087355	2017.12.26	0.6956					>500.0
169	2	2	48	44270060	2018.04.23	0.6347					20.46
174	2	2	68	44323072	2018.04.24	0.6337
189	2	2	54	43200786	2018.04.26	0.6267
201	2	2	32	44403667	2018.04.27	0.6267					12.15
270	2	2	59	44399894	2018.05.14	0.6179
283	2	2	50	40012693	2018.05.15	0.6277					9.08
287	2	1	47	XH1340557	2018.05.15	0.6858
289	2	1	49	43389626	2018.05.15	0.6188
298	2	1	64	44078909	2018.05.21	0.6149
325	2	2	49	40174287	2018.05.28	0.6247					24.57
331	2	2	35	44457446	2018.05.28	0.6551					1.23
31	2	2	60	41098630	2014.06.04	0.6942
32	2	2	43	41091419	2014.06.04	0.6963
33	2	2	41	17297899	2014.06.04	0.735					1.9
36	2	2	54	41110818	2014.06.04	0.6984
37	2	2	31	40505994	2014.06.04	0.6935
38	2	2	56	40857909	2014.06.04	0.6963
39	2	2	45	XH1039547	2014.06.04	0.697
40	2	2	32	18032009	2014.06.04	0.6949
103	2	2	35	16687061	2014.06.11	0.7594
106	2	2	61	C624463	2014.06.11	0.8101
107	2	2	53	41130148	2014.06.11	0.738				1.04	7
108	2	2	56	41126136	2014.06.11	0.8372
114	2	1	48	41126848	2014.06.11	0.7179
116	2	1	50	41147875	2014.06.11	0.9668
122	2	2	54	41444238	2017.12.25	0.8118
239	2	1	35	44269656	2018.05.08	0.5457
265	2	2	65	43532044		0.5323
26	2	2	53	XH1387346	2017.02.10	0.5365
45	2	2	15	XH1299862	2017.02.13	0.4476
50	2	1	28	42326835	2017.02.14	0.6626
67	2	2	51	18368715	2017.02.15	1.3114
68	2	2	49	43237318	2017.02.20	0.713
69	2	2	60	C579945		2.2415
76	2	2	46	43186671	2017.02.23	0.4643
78	2	2	45	42930727	2017.02.15	0.4604
86	2	2	39	42954039	2017.02.16	0.705					0.7
91	2	1	43	43292437	2017.02.17	3.3743
92	2	2	59	42460118	2017.02.18	0.4948
94	2	2	60	43267519		2.3121
96	2	1	44	42914923	2017.02.16	1.9966
101	2	2	59	43181312	2017.03.20	0.5004
102	2	2	62	42753310	2017.03.20	0.9588
389	2	2	51	44922112		0.6526
429	2	2	41	43919020		0.5557					16.10
434	2	1	29	45042681		0.5424					6.65
437	2	2	49	44974424		0.5416					10.64
438	2	2	51	45029932		0.651
4	3	2	36	17080278	2017.02.08	2.553	1	Ⅰ	T1N1M0	1308	<0.040
5	3	1	42	43243805	2017.02.09	2.067	1	Ⅰ	T1N1M0	1.26	8.4
29	3	2	56	41450377	2017.02.10	0.672	0	Ⅰ	T1N0M0	0.5	<0.040
30	3	1	38	W161376	2017.02.10	1.138	1	Ⅰ	T1N1M0	1.59	0.06
14	3	2	52	18849332	2017.02.08	0.943	0	Ⅰ	T1N0M0	0.576	500
70	3	2	36	41044964	2017.02.16	2.917	0	Ⅰ	T1N0M0	0.5	13.98
7	3	2	40	43260331	2017.02.07	0.945	0	Ⅰ	T1N0M0	0.5	0.23
19	3	2	43	43073786	2017.02.10	1.872	0	Ⅰ	T1N0M0	0.669	0.37
36	3	2	30	43083910	2017.02.10	0.874	0	Ⅰ	T1N0M0	0.5
63	3	2	49	43278435	2017.03.17	0.759	0	Ⅰ	T1N0M0	0.5
77	3	1	44	18369107	2017.02.20	0.828	0	Ⅰ	T1N0M0	0.5	14.07
84	3	1	30	40718910	2017.02.15	0.899	0	Ⅰ	T1N0M0	4.57	4.02
93	3	2	37	18890312	2017.02.17	3.216	1	Ⅰ	T4aN1aM0	0.5	18.92
100	3	2	38	43317261	2017.03.20	2.957	0	Ⅰ	T1N0M0	0.5	1.46
105	3	2	44	43362023	2017.03.21	0.801	0	Ⅰ	T1N0M0	0.5	25.57
2	3	2	45	43891794	2017.11.21	1.87	1	ⅣA	T4aN1aM0	1.01	29.29
6	3	2	55	43981100	2017.11.19	1.51	0	Ⅰ	T1N0M0	1.35	3.76
9	3	2	46	C528884	2017.11.16	1.92	0	Ⅰ	T1N0M0	0.5	0.08
11	3	2	43	43965602	2017.11.16	1.49	1	Ⅰ	T1N1M0	0.5	2.78
13	3	2	27	42599510	2017.11.16	1.79	0	Ⅰ	T1N0M0	0.5	5.71
16	3	2	52	43803164	2017.11.16	0.9	0	Ⅰ	T1N0M0	0.5	15.96
21	3	2	54	26207281	2017.11.16	1.44	0	Ⅰ	T1N0M0	0.5	4.46
22	3	2	34	18477131	2017.11.17	1.56	0	Ⅰ	T1N0M0	0.5	3.26
25	3	1	24	43937421	2017.11.20	1.87	0	Ⅰ	T1N0M0	0.838	17.23
29	3	2	55	41121873	2017.11.17	1.9	0	Ⅰ	T1N0M0	0.5	23.39
30	3	1	42	43949372	2017.11.20	1.27	0	Ⅰ	T1N0M0	2.17
32	3	2	31	43906559	2017.11.17	1.36	0	Ⅰ	T1N0M0	0.5	40.90
39	3	2	55	43395569	2017.11.20	1.5	0	Ⅰ	T1N0M0	55.37	1.92
40	3	1	31	43709381	2017.11.17	1.6	0	Ⅰ	T1N0M0	2.34	17.5
43	3	2	37	41869579	2017.11.20	1.98	0	Ⅰ	T1N0M0	0.5	12.74
48	3	1	35	40048332	2017.11.17	2.08	0	Ⅰ	T1N0M0	2.21	18.26
4	3	2	52	43455934	2017-11-15	0.899	0	Ⅰ	T1N0M0	0.5	17.18
29	3	2	55	41121873	2017.11.17	3.216	0	Ⅰ	T1N0M0
30	3	1	42	43949372	2017.11.20	2.957	0	Ⅰ	T1N0M0
14	3	1	51	43224628	2017.11.17	0.801	1	ⅣA	T4aN1aM0	0.5	25
70	3	2	28	17457660	2017.11.29	0.817	0	Ⅰ	T1N0M0		2.45
63	3	2	42	43884846	2017.11.30	0.77	1	Ⅰ	T1N1M0
77	3	2	35	43513078	2017.11.27	0.788	1	Ⅰ	T1N1M0
84	3	1	28	43351408	2017.12.06	0.956	1	Ⅰ	T1N1M0
93	3	2	58	42737463	2017.12.25	0.867	0	Ⅰ	T1N0M0
100	3	2	63	XH1171360		0.737	1	ⅣA	T4aN1aM0
171	3	1	40	44384002	2018.04.26	0.817	0	Ⅰ	T1N0M0	2.59	24.76
172	3	2	37	XH1338782	2018.04.26	0.77	1	Ⅰ	T1N1M0	0.5	0.04
175	3	2	48	44393909	2018.04.26	0.788	0	Ⅰ	T1N0M0	0.5	6.17
176	3	2	44	44357992	2018.04.26	0.956	0	Ⅰ	T1N0M0	0.5	500
177	3	2	33	44326366	2018.04.25	0.867	1	Ⅰ	T1N1M0	0.5	18.28
178	3	1	54	44400068	2018.04.25	0.737	1	Ⅰ	T1N1M0	2.55	33
179	3	2	30	44331289	2018.04.26	0.899	1	Ⅰ	T1N1M0	0.526	19.78
180	3	2	41	42475678	2018.04	1.539	0	Ⅰ	T1N0M0	0.593	8.65
181	3	1	54	41705820	2018.04.26	0.79	1	ⅣA	T4aN1aM0	0.5	0.52
182	3	1	26	44261126	2018.04.26	0.787	1	Ⅱ	T1N1M0	0.772	500
183	3	2	31	44405289	2018.05.10	0.789	1	Ⅰ	T1N1M0	0.5	125.4
184	3	2	48	44403470	2018.05.11	0.816	0	Ⅰ	T1N0M0	0.759	53.62
185	3	2	35	17233435	2018.04.27	0.8247	1	Ⅰ	T1N1M0	0.67	16.21
186	3	2	53	44385914	2018.04.27	0.8397	0	Ⅰ	T1N0M0
187	3	2	40	44115085	2018.04.27	0.8377	0	Ⅰ	T1N0M0	0.535	65.18
188	3	2	45	44345922	2018.04.28	0.8267	1	ⅣA	T4aN1aM0	2.21	2.20
190	3	2	59	44294770	2018.04.28	0.8347	0	Ⅰ	T1N0M0	0.5	15.91
191	3	1	51	44014291	2018.04.28	0.8287	0	Ⅰ	T1N0M0	1.84	7.12
192	3	2	39	44384739	2018.04.27	0.8277	1	Ⅰ	T4aN1aM0	0.5	15.86
193	3	2	37	44233635	2018.04.28	0.8307	0	Ⅰ	T1N0M0	0.5	11.83
194	3	2	53	41866834	2018.05.02	0.8307	0	Ⅰ	T1N0M0	0.5	258.90
199	3	2	45	41109946	2018.04.28	0.9945	0	Ⅰ	T1N0M0	0.5	42.39
204	3	2	32	26058051	2018.04.28	0.8159	0	Ⅰ	T1N0M0	0.643	1.12
205	3	2	32	43675874	2017.09.01	0.8118	1	Ⅰ	T1N1M0	0.616	37.82
206	3	2	38	44398786	2018.04.27	0.7751	0	Ⅰ	T1N0M0	0.5	26.76
208	3	1	35	44079846	2018.05.02	0.7896	0	Ⅰ	T1N0M0	0.5	38.37
209	3	2	51	44406332	2018.05.04	0.768	0	Ⅰ	T1N0M0	1.59	0.95
210	3	2	31	44383461	2018.04.28	0.7755	0	Ⅰ	T1N0M0	0.5	17.97
211	3	2	69	43938500	2018.05.18	0.7668	0	Ⅰ	T1N0M0	1.2	3.46
212	3	1	29	44412287	2018.05.02	0.6471	0	Ⅰ	T1N0M0	0.5	15.59
216	3	2	24	43686086	2018.05.04	0.7728	0	Ⅰ	T1N0M0	0.5	1.34
217	3	2	66	41445704	2018.05.04	0.6798	0	Ⅰ	T1N0M0	0.5	317.9
218	3	2	47	41991912	2018.05.07	0.6112	0	Ⅰ	T1N0M0	0.5	11.87
219	3	2	35	44171744	2018.05.04	0.7791	0	Ⅰ	T1N0M0	0.5	54.61
220	3	2	40	18901385	2018.05.11	0.6663	0	Ⅰ	T1N0M0	0.5	1.95
221	3	1	54	44124124	2018.05.04	0.7641	0	Ⅰ	T1N0M0	1.45	8.29
222	3	2	43	41997256	2018.05.04	0.7859	0	Ⅰ	T1N0M0	0.5	24.04
223	3	1	44	44422972	2018.05.07	0.7896	0	Ⅰ	T1N0M0	1.21	95.46
225	3	2	63	16412517	2018.05.04	0.6777	0	Ⅰ	T1N0M0	0.5	>500.0
230	3	1	58	44421424	2018.05.04	0.7693	0	Ⅰ	T1N0M0	6.83	2.88
231	3	2	33	44303115	2018.05.10	0.7055	1	Ⅰ	T1N1M0	0.5	15.6
232	3	2	30	44398217	2018.05.07	0.7908	0	Ⅰ	T1N0M0	0.5	4.67
268	3	1	47	44263868	2018.05.15	0.6441	0	Ⅰ	T1N0M0	0.5	10.55
269	3	2	35	44361973	2018.05.17	0.614	0	Ⅰ	T1N0M0	0.5	179.7
272	3	2	53	40975167	2018.05.17	0.7458	0	Ⅰ	T1N0M0	0.5	0.07
273	3	1	39	44408849	2018.05.15	0.6372	0	Ⅰ	T1N0M0	0.5	3.9
275	3	2	50	44432539	2018.05.15	0.7899	0	Ⅰ	T1N0M0	0.5	23.45
277	3	1	24	44348317	2018.05.16	0.8244	0	Ⅰ	T1N0M0	0.515	1.57
278	3	1	49	16911772	2017.01.10	0.7693	0	Ⅰ	T1N0M0	0.941	1.05
280	3	1	40	44442314	2018.05.18	0.7881	0	Ⅰ	T1N0M0	0.5	2.16
281	3	1	43	42841709	2018.05.17	0.7817	0	Ⅰ	T1N0M0	0.5	1.80
282	3	1	33	44436517	2018.05.17	0.8093	1	Ⅰ	T1N1M0	0.5	214.4
284	3	2	41	18223220	2018.05.18	0.7435	0	Ⅰ	T1N0M0	2.01	2.24
286	3	2	38	43002948	2018.05.23	0.7957	0	Ⅰ	T1N0M0	0.5	<0.040
288	3	1	62	41062431	2018.05.17	0.7263	0	Ⅰ	T1N0M0	0.5	0.26
290	3	2	44	1548253	2018.05.16	0.6979	0	Ⅰ	T1N0M0	0.5	1.13
291	3	1	45	41180875	2018.05.17	0.7693	0	Ⅰ	T1N0M0	1.14	16.25
293	3	2	52	44426049	2018.05.16	0.917	0	Ⅰ	T1N0M0	0.5	2.76
294	3	2	46	42000555	2018.05.16	0.8303	0	Ⅰ	T1N0M0	0.5	9.56
295	3	2	38	44140873	2018.05.23	0.7935	0	Ⅰ	T1N0M0	0.5	10.93
296	3	2	41	44465800	2018.05.22	0.7287	0	Ⅰ	T1N1M0	0.5	7.19
297	3	2	47	44351685	2018.05.24	0.8031	0	ⅣA	T1N1bMO	0.5	8.60
300	3	2	50	43619800	2018.06.11	0.7763	0	Ⅲ	T1N1aMO	1.34	29.98
301	3	2	33	44399592	2018.05.22	0.7908	0	Ⅰ	T1N1bMO	0.605	11.39
302	3	2	44	17061897	2018.05.22	0.6947	0	Ⅰ	T1N1bMO	0.5	6.59
303	3	1	35	40150466	2018.05.28	0.7737	0	Ⅰ	T1N1bMO	0.5	3.56
304	3	1	36	44406033	2018.05.24	0.8933	0	Ⅰ	T1N1aMO	0.939	0.22
305	3	1	52	44422716	2018.05.24	0.8347	0	Ⅲ	T1N1aMO	2.66	0.52
306	3	2	43	44425488	2018.05.24	0.9085	0	Ⅰ	T1N1aMO	0.5	7.11
307	3	1	41	44387397	2018.05.24	0.7658	0	Ⅰ	T1N1aMO	0.5	9.18
308	3	1	40	28932355	2018.05.24	0.7862	0	Ⅰ	T1N1bMO	0.879	1.78
309	3	2	58	40225293	2018.05.25	0.7492	0	ⅣA	T1N1bMO	0.5	40.55
310	3	1	41	44463992	2018.05.28	0.7844	0	Ⅰ	T1N1aMO	1.12	15.05
314	3	2	51	44389477	2018.05.28	0.7844	1	ⅣC	T1N1bM1	1.58	>500.0
316	3	1	57	42759600	2018.05.24-2018.06.02	0.7746	0	ⅣA	T1N1bMO	0.724	1.91
339	3	2	50	44494887	2018.06.01	0.7684	0	ⅣA	T1N1bMO	0.5	6.1
340	3	1	51	40985110	2018.05.31	0.7746	0	ⅣA	T1N1bMO	0.5	10.45
341	3	1	39	44459224	2018.06.20	0.8936	0	Ⅰ	T1N1aMO	2.45	7.88
343	3	2	55	40208216	2018.06.20	0.7355	0	Ⅲ	T1N1aMO	0.5	5.25
344	3	1	32	44523683	2018.06.15	0.8232	0	Ⅰ	T1N0MO	0.645	86.67
345	3	1	44	44449695	2018.06.28	0.8542	0	Ⅰ	T1N1bMO	1.3	7.42
346	3	2	37	44225219	2018.06.15	0.6736	0	Ⅰ	T1N1aMO	0.867	9.57
347	3	2	45	17072857	2018.06.15	0.5667	1	ⅣC	T1N M1	0.5	5.15
348	3	2	53	43434707	2018.07.02	0.7022	0	ⅣA	T1N1bMO	0.698	0.13
350	3	2	52	44406059	2018.06.20	0.7209	0	ⅣA	T1N1bMO	0.5	6.73
351	3	1	34	44566017	2018.06.27	0.7321	1	Ⅱ	T1N1bM1	4.11	20.29
352	3	2	39	44548249	2018.06.25	0.5623	0	Ⅱ	T1N1aMO	0.5	3.28
353	3	2	42	44564796	2018.06.25	0.7691	0	Ⅰ	T1N1bMO	0.5	3.33
354	3	1	44	44558615	2018.06.25	0.7691	0	Ⅰ	T1N1bMO	3.53	7.03
357	3	2	46	44544604	2018.06.27	0.8066	1	ⅣC	T1N1aM1	1.07	0.53
359	3	2	28	44322387	2018.06.27	0.6009	0	Ⅱ	T1N1bMO	0.5	113.3
360	3	1	36	43886514	2018.06.26	0.7412	0	Ⅰ	T1N1bMO	3.08	7.76
235	3	1	43	44416596	2018.05.07		0	Ⅰ	T1N1aMO	0.5	4.31
236	3	2	28	44428115	2018.05.07		1	Ⅱ	T1N1aM1	1.69	6.06
237	3	1	28	44408936	2018.05.07		0	Ⅰ	T1N1bMO	1.49	20.32
238	3	2	34	40904452	2018.05.08		1	Ⅱ	T1N1bM1	5.23	2.65
240	3	1	62	44282474	2018.05.10		0	ⅣA	T1N1bM0	0.5	10.5
242	3	2	27	44418676	2018.05.10		0	Ⅰ	T1N1bM0	0.5	8.02
243	3	1	49	44422400	2018.05.07-2018.05.14		0	Ⅲ	T1N1aM0	0.5	0.40
244	3	2	46	44407754	2018.05.10		0	ⅣA	T1N1bM0	0.5	6.33
245	3	1	40	44409180	2018.05.10		0	Ⅰ	T1N1aM0	2.1	12.75
246	3	1	26	43036975	2018.05.13		0	Ⅰ	T1N0M0	1.95	37.14
247	3	2	46	44378957	2018.05.09		0	Ⅰ	T1N0M0	0.5	5.71
248	3	1	55	41631881	2018.05.14		0	ⅣA	T1N1bM0	0.5	10.07
249	3	2	53	44344737	2018.05.11		0	ⅣA	T1N1bM0	1.64	7.38
250	3	2	52	44251753	2018.05.10		0	Ⅲ	T1N1aM0	0.5	1.86
252	3	2	56	40773285	2018.05.10		0	Ⅲ	T1N1aM0	0.593	10.54
253	3	2	51	40979084	2018.05.15		0	Ⅰ	T1N0M0	2.32	22.97
254	3	1	28	44441263	2018.05.14		0	Ⅰ	T1N1bM0	2.16	20.23
255	3	2	56	44432194	2018.05.24		0	ⅣA	T1N1bM0	0.5	0.74
256	3	1	42	44393782	2018.05.31		0	Ⅰ	T1N1bM0	3。35	0.95
257	3	2	33	44384755	2018.05.24		0	Ⅰ	T1N1bM0		1.50
259	3	2	31	44377845	2018.05.11		0	Ⅰ	T1N1aM0	0.5	52.4
260	3	2	60	44391232	2018.05.11		0	ⅣA	T1N1bM0	0.5	3.00
262	3	2	52	42616508	2018.05.18		0	ⅣA	T1N1aM0	0.5	16.65
264	3	1	38	44296597	2018.05.10		0	Ⅰ	T1N1bM0	0.5	18.51
266	3	2	45	44436487	2018.05.17		0	ⅣA	T1N1bM0	0.5	94.14
267	3	2	49	18265853	2018.05.15		0	ⅣA	T1N1bM0	0.5	7.07
317	3	2	40	44485204	2018.06.04	0.5372	0	Ⅰ	T1N1bM0	0.5	18.39
318	3	2	45	44455146	2018.05.28	0.533	0	Ⅲ	T1N1aM0	0.5	8.51
319	3	2	37	44283438	2018.05.25	0.5529	1	Ⅱ	T1N1bM1	4.57	0.84
321	3	2	56	44480993	2018.05.25	0.5365	0	ⅣA	T1N1bM0	0.5	46.94
324	3	1	52	44483339	2018.05.31	0.5358	0	ⅣA	T1N1bM0	0.54	6.06
327	3	2	38	41775133	2018.05.30	0.5443	0	Ⅰ	T1N1bM0	0.5	18.26
328	3	2	33	43954068	2018.05.31	0.5566	0	Ⅰ	T1N1bM0	0.5	57.31
329	3	2	51	44461810	2018.06.01	0.5805	0	Ⅲ	T1N1aM0	1.35	2.07
330	3	2	59	44464642	2018.05.31	0.5486	0	ⅣA	T1N1bM0	0.5	11.17
334	3	2	34	43548810	2018.05.31	0.561	0	Ⅰ	T1N1bM0	0.5	21.02
335	3	2	41	44502887	2018.06.08	0.5365	0	Ⅰ	T1N1bM0	0.5	0.15
336	3	1	44	44487454	2018.05.31	0.5261	0	Ⅰ	T1N1aM0	0.5	8.26
46	3	2	30	43061878		0.4729				0.5	50.29
60	3	2	39	43200879	2017.02.13	0.4783	1	Ⅱ	T1N M1	0.5	26
64	3	2	58	43270125		1.5016				0.5	0.162
66	3	1	38	43116013		0.6157	1	Ⅱ	T1N M1	1.01	17.9
71	3	2	52	42241578	2017.02.16	0.591	1	ⅣC	T1N M1	0.5	2.91
72	3	2	35	42791678	2017.02.14	0.577	0	Ⅰ	T1N M0	1.05	12.67
77	3	1	44	18369107	2017.02.20	4.4356	1	Ⅱ	T1N M1
82	3	1	25	43284705	2017.02.17	2.6479	1	Ⅱ	T1N M1	1.69	107.5
86	3	2	39	42954039	2017.02.16	0.591	0	Ⅰ	T1N M0
88	3	2	50	43176368	2017.02.16	0.5265	1	ⅣC	T1N M1	55.37	5.83
89	3	2	36	18156044	2017.02.20	0.454	1	Ⅱ	T1N M1	2.34	3.95
90	3	1	45	43293186	2017.02.17	0.702	0			0.5	9.84
95	3	1	51	28409596	2017.02.17	3.5752	0			0.5	7.27
98	3	2	33	43260418		0.4407	0	Ⅰ	T1N M0	0.5	17.99
100	3	2	38	43317261	2017.03.20	1.7757	1	Ⅱ	T1N M1	1.13	2.33
104	3	2	56	43367737		0.4464	1	ⅣC	T1N M1	0.5	15.04
105	3	2	44	43362023		0.4508
106	3	2	33	42292264		0.4495
107	3	2	44	42397339		0.6551
109	3	2	40	18497882		0.4617	0	Ⅰ	T1N M0
112	3	1	40	43360203		0.4303				0.5	4.06
113	3	2	47	40475813		0.4611
114	3	2	56	43152960		0.4291
115	3	2	54	17602932		0.4676
116	3	2	38	42427090	2017.03.23	0.4476	0	Ⅰ	T1N M0	2.21	55.24
117	3	2	38	40480262		0.4457	0	Ⅰ	T1N M0
118	3	1	42	17894691	2017.03.23	0.4407	0	Ⅰ	T1N M0	0.5	0.709
119	3	2	60	43387150		0.4617	0	Ⅰ	T1N0M0
120	3	1	36	42767441	2017.03.27	0.4457	1	Ⅱ	T1N M1		8.65
121	3	1	58	43351516	2017.03.24	0.701	1	ⅣC	T1N M1	0.5	0.064
122	3	1	49	42021089		0.4783
123	3	2	54	16386432		0.5431	1	ⅣC	T1N M1
126	3	1	43	43369452	2017.03.24	0.465	1	Ⅱ	T1N M1	0.5	12.66
376	3	1	35	44739200		0.8268	1	Ⅰ	T4aN1aM0	2.62	12.04
377	3	2	50	44499894		0.6884	0	Ⅰ	T1N0M0	0。604	14.35
378	3	2	50	45042162		0.8425	0	Ⅰ	T1N0M0	0.5	6.74
379	3	2	47	44964389		0.7159	0	Ⅰ	T1N0M0
380	3	2	37	XH1205951		0.8159	0	Ⅰ	T1N0M0
381	3	1	43	44478566		0.7629	0	Ⅰ	T1N0M0
382	3	2	44	45044003		0.8337	1	Ⅰ	T1N1M0
383	3	2	34	40746030		0.6573	0	Ⅰ	T1N0M0	0.5	8.63
384	3	2	28	45046287		0.7283	0	Ⅰ	T1N0M0	1.69	25.35
385	3	1	52	45052940		0.7729	0	Ⅰ	T1N0M0
386	3	2	35	43340620		0.9185	0	Ⅰ	T1N0M0
388	3	2	28	44739186		0.7914	1	Ⅰ	T1N1M0
390	3	2	43	26898671		0.7532	1	Ⅰ	T1N1M0	0.5	0.25
391	3	2	32	41783655		0.6792	0	Ⅰ	T1N0M0
392	3	1	31	45011402		0.7107	0	Ⅰ	T1N0M0	1.44	2.99
395	3	2	49	C674426		0.6534	0	Ⅰ	T1N0M0	0.5	6.29
396	3	1	54	45040454		0.8101	1	Ⅰ	T1N1M0
397	3	2	44	44734512		0.5727	0	Ⅰ	T1N0M0	1.55	21.85
398	3	2	48	45048170		0.6011	1	Ⅳ	T4aN1aM0
399	3	2	33	44956990		0.6973	1	Ⅰ	T4aN1aM0	0.5	10.24
400	3	1	37	44914326		0.7104	1	Ⅰ	T4aN1aM0	0.5	7.96
401	3	2	51	45026314		0.7206	1	Ⅳ	T4aN1aM0
406	3	2	44	45022435		0.5432	1	Ⅰ	T4aN1aM0	0.5	12.09
407	3	2	56	W109630		0.6393	0	Ⅰ	T1N0M0
408	3	1	35	45019371		0.7221	0	Ⅰ	T1N0M0
409	3	2	60	44696303		0.634	1	Ⅳ	T4aN1aM0
410	3	1	29	45061096		0.7419	0	Ⅰ	T1N0M0	1.26	8.94
411	3	2	62	45045096		0.7274	0	Ⅰ	T1N0M0
413	3	1	38	45046656		0.6355	0	Ⅰ	T1N0M0
415	3	2	24	43833005		0.6542	0	Ⅰ	T1N0M0
416	3	2	49	44307027		0.6317	0	Ⅰ	T1N0M0
417	3	1	34	44873669		0.6463	1	Ⅰ	T4aN1aM0	3.78	0.89
418	3	2	36	42886653		0.6455	0	Ⅰ	T1N0M0	0.5	6.78
419	3	2	39	XH1427564		0.6645	1	Ⅰ	T4aN1aM0	0.5	3.06
420	3	1	32	44514494		0.6909	0	Ⅰ	T1N0M0	1.04	43.28
421	3	2	57	42677335		0.6463	0	Ⅰ	T1N0M0
422	3	2	32	45015900		0.6494	0	Ⅰ	T1N0M0
423	3	1	52	45024179		0.6332	0	Ⅰ	T1N0M0	1.43	11.34
424	3	2	46	45067423		0.6355	0	Ⅰ	T1N0M0	0.5	14.84
425	3	1	47	45067920		0.6424	0	Ⅰ	T1N0M0
426	3	2	32	45069994		0.6355	0	Ⅰ	T1N0M0
427	3	2	36	41558278		0.6409	0	Ⅰ	T1N0M0
428	3	2	45	44965169		0.6718	0	Ⅰ	T1N0M0
430	3	2	55	17646355		0.6826	0	Ⅰ	T1N0M0	7.74	20.74
431	3	2	37	45050040		0.6332	0	Ⅰ	T1N0M0
433	3	2	48	41277980		0.6309	0	Ⅰ	T1N0M0
435	3	1	33	45033860		0.6401	0	Ⅰ	T1N0M0	1.96	1.30
436	3	2	35	18048707		0.6294	0	Ⅰ	T1N0M0
439	3	2	37	45054025		0.6686	0	Ⅰ		1.9	0.28
440	3	2	32	44401615		0.6432	0	Ⅰ	T1N0M0
442	3	1	46	45057646		0.9893	0	Ⅰ	T1N0M0
443	3	1	37	42177542		0.6401	0	Ⅰ	T1N0M0
444	3	2	37	45037102		0.6792	0	Ⅰ	T1N0M0
445	3	2	30	43499981		0.6386	0	Ⅰ	T1N0M0	0.5	2.17
446	3	2	51	44548190		0.6401	0	Ⅰ	T1N0M0
448	3	2	37	45047725		0.6332	0	Ⅰ	T1N0M0
451	3	2	48	45058888		0.6621	0	Ⅰ	T1N0M0
452	3	1	43	45059053		0.6743	1	Ⅰ	T4aN1aM0	2.81	7.22
453	3	2	55	42391563		0.6463	0	Ⅰ	T1N0M0
455	3	1	45	45077704		0.7738
456	3	2	42	45005532		0.6613	0	Ⅰ	T1N0M0
457	3	1	52	45059701		0.6727	0	Ⅰ	T1N0M0
458	3	2	51	45008065		0.6416	0	Ⅰ	T1N0M0	0.5	10.75
459	3	2	44	44355169		0.696	0	Ⅰ	T1N0M0	1.31	1.01
460	3	2	46	44974187		0.7884	1	Ⅳ	T4aN1aM0	0.5	5.65
461	3	1	34	45032276		0.65	0	Ⅰ	T1N0M0	1.29	29.23
463	3	1	29	45045064		0.696	1	Ⅰ	T1N0M0	1.48	16.25
464	3	2	57	44976362		0.634	0	Ⅰ	T1N0M0
466	3	2	34	44992317		0.6432	0	Ⅰ	T1N0M0
467	3	2	44	44141597		0.6526	0	Ⅰ	T1N0M0	27.05	0.04
1	4	1	63	367775	2017-07-31	3.257	1	IVa	T1N1bM0	83.98	2.09
3	4	2	29	368917	2017-08-15	1.662	0	II	T2N0M0	91.9	31.96
4	4	2	53	369037	2017-08-16	1.443	0	IVa	T1N1bM0	0.5	10.37
5	4	2	69	369433	2017-08-14	1.518	1	ⅣC	T1N M1	0.5	2.93
6	4	2	70	369670	2017-08-22	1.254	0	II	T2N0M0	22.96	500
7	4	2	49	369933	2017-08-23	1.111	1	IV	T1N1bM0	0.502	23.91
8	4	1	48	359771	2017-04-25	4.955	1	III	pT1N1M0	129.8	32.94
9	4	1	41	363425	2017-06-05	2.623	1	IV	T1N1bM0	1913	0.318
10	4	2	53	365511	2017-07-05	1.205	0	II	T2N0M0	480.8	0.567
11	4	1	66	366022	2017-07-11	3.215	1	ⅣC	T1N1M1	2000	19.66
1	4	2	33	239485		2.737	1	IVa	pT3N1bM0	0.5	3.45
2	4	2	50	351614		3.3186	1	IVa	cT4aN1aM0	0.841	1.85
3	4	1	49	355080		1.2817	1	IVa	T4aN1aM1	0.5	41.57
4	4	2	47	364167		1.1475	0	III	T3N0M0	0.5	0.04
5	4	2	49	380787		1.517	1	I	T4aN1bM0	0.5	3.96
6	4	1	42	313339		1.8094	1	III	cT3N1M0	0.5	79.46
7	4	1	46			1.5923	1	ⅣC	cT3N1bM1	0.5	0.16
8	4	2	49	273495		4.2119	0	I	T1N0M0	0.5	160.4
13	4	1	44	1059629		3.2322	1	IVa	T2N1bM0
14	4	1	39	380678		1.8646				58.67	2.04
61	4	1	51	287782	2015.04.19	2.0143				0.5	2.55
62	4	2	53	265545	2015.04.19	1.2449				0.5	5.51
63	4	1	56	261753	2015.04.19	1.5682				0.5	5.38
64	4	2	50	252215	2015.04.19	1.0136				0.5	26.65
65	4	2	46		2015.04.19	1.2842				0.5	25.35
66	4	1	51	298719	2015.04.19	1.3609				0.5	12.91
67	4	1	41	254533	2015.04.19	2.1889				0.5	71.76
68	4	1	56	261753	2015.04.19	1.5832				1.42	0.574
69	4	1	56	300149	2015.04.19	1.3609				0.5	23.34
70	4	2	53	249875	2015.04.19	1.1018				0.5	4.06
71	4	1	51	287782	2015.04.19	1.5482				0.5	60.44
72	4	1	41	252794	2015.04.19	1.4123				0.5	21.24
73	4	1	56	300149	2015.04.19	2.7098				0.5	500
74	4	1	56	246950	2015.04.19	1.3976				0.5	5.83
75	4	1	45			0.9999				0.5	4.4
76	4	1	54			1.092				0.5	16.28
77	4	2	54			0.942				0.5	0.324
78	4	1	42			1.1193				1.18	107.8
1	5	1	65	367213	2017-07-28	3.088	1	ⅣC	cT3N1bM1	0.5	500
2	5	2	72	366415	2017-07-19	7.89	0	ⅣC	pT2N0M1	1.34	500
3	5	2	60	368685	2017-08-09	5.659	0	II	T2N0M0	0.5	30.42
5	5	2	53	369037	2017-08-16	4.274	0	II	T2N0M0	1326	5.87
6	5	2	30	370259	2017-08-25	3.24	0	I	T2N0M0	0.5	500
7	5	2	81	370528	2017-08-30	2.826	0	II	T2N0M0	0.5	500
	group	gender					metastasis
	1:HC	1:male					0：no
	2:TN	2:female					1：yes
	3:PTC
	4:MTC
	5:FTC
